# Supplementary material for: Multi-redox indenofluorene chromophores incorporating dithiafulvene donor and ene/enediyne acceptor units
Source: publisher site journal article supplement (doi:10.3762/bjoc.20.8), 2024-01-15
Supplement: Additional file 1 [file 1860-5397-20-8-S1.pdf]

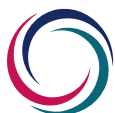

## Supporting Information

for

### **Multi-redox indenofluorene chromophores incorporating dithiafulvene donor and ene/enediyne acceptor units**

Christina Schöttler, Kasper Lund-Rasmussen, Line Brolø, Philip Vinterberg, Ema Bazikova, Viktor B. R. Pedersen and Mogens Brøndsted Nielsen

*Beilstein J. Org. Chem.* **2024**, *20*, 59–73. [doi:10.3762/bjoc.20.8](https://doi.org/10.3762/bjoc.20.8)

**Synthetic protocols, UV–vis and NMR spectra, differential pulse voltammograms, and X-ray crystallographic data**

## Table of Contents

|                                                                             |        |
|-----------------------------------------------------------------------------|--------|
| Synthetic protocols .....                                                   | p. S2  |
| UV-vis absorption studies of compounds 10 and 11 (different solvents) ..... | p. S16 |
| UV-vis absorption studies of 20 (degradation studies) .....                 | p. S16 |
| $^1\text{H}$ and $^{13}\text{C}$ NMR spectra .....                          | p. S18 |
| Electrochemistry .....                                                      | p. S39 |
| X-ray crystallographic data .....                                           | p. S42 |
| References .....                                                            | p. S84 |

## Synthetic protocols

**General methods.** Anhydrous MeOH was obtained by distillation from activated Mg and stored over 3 Å molecular sieves, or by drying over 3 Å molecular sieves. All remaining anhydrous solvents were obtained from a solvent drying tower (IT model PS-MD-05). HPLC grade solvents were used unless otherwise specified. Purification by chromatography was performed using silica gel (flash: 40–63 μm, Sepacore® Flash Systems X10/X50: 40–63 μm). TLC was performed using aluminum sheets covered with silica gel coated with fluorescent indicator. NMR spectra were recorded on Bruker instrument at 500 MHz and 126 MHz for  $^1\text{H}$  and  $^{13}\text{C}$  NMR, respectively. Deuterated chloroform ( $\text{CDCl}_3$ ,  $^1\text{H}$  = 7.26 ppm,  $^{13}\text{C}$  = 77.16 ppm), deuterated  $\text{CH}_2\text{Cl}_2$  ( $\text{CD}_2\text{Cl}_2$ ,  $^1\text{H}$  = 5.32 ppm,  $^{13}\text{C}$  = 54.00 ppm), deuterated DMSO ( $(\text{CD}_3)_2\text{SO}$ ,  $^1\text{H}$  = 2.50 ppm,  $^{13}\text{C}$  = 39.53 ppm), deuterated acetone ( $(\text{CD}_3)_2\text{CO}$ ,  $^1\text{H}$  = 2.05 ppm,  $^{13}\text{C}$  = 29.84 ppm), or deuterated benzene ( $\text{C}_6\text{D}_6$ ,  $^1\text{H}$  = 7.16 ppm,  $^{13}\text{C}$  = 128.39 ppm) were used as solvents and internal references. Chemical shift values are referenced to the ppm scale and coupling constants are expressed in Hertz (Hz). HRMS analysis was performed on a Bruker SolariX XR MALDI-FT-ICR instrument with dithranol as matrix. Melting points are not corrected.

Synthetic protocols for **9**, **13**, **16**, **18**, **19**, **23**, and **29** are included in the main article.

## Compound 7

4,5-Bis(bromomethyl)-1,3-dithiole-2-thione (1.31 g, 4.09 mmol) was dissolved in a mixture of anhydrous MeCN (100 mL) and anhydrous THF (50 mL). Hexylamine (0.850 mL, 6.22 mmol) and cesium carbonate (5.42 g, 16.6 mmol) were added to the stirring mixture, which was then heated to reflux for 1 h. The reaction mixture was then cooled to rt before it was filtered, and the filtrate was concentrated under reduced pressure. The residue was dissolved in CH<sub>2</sub>Cl<sub>2</sub> (150 mL), washed with water (4 × 50 mL), dried over MgSO<sub>4</sub>, and concentrated under reduced pressure resulting in a brown oil that was purified by flash column chromatography (SiO<sub>2</sub>, 20% EtOAc/heptane), yielding compound **7** (811 mg, 77%) as a yellow oil, which solidified upon cooling. *R*<sub>f</sub> = 0.32 (20% EtOAc/heptane). M.p.: 40-42 °C. <sup>1</sup>H NMR (500 MHz, CDCl<sub>3</sub>) δ 3.84 (s, 4H), 2.74 (t, *J* = 7.4 Hz, 2H), 1.50 (p, 7.7 Hz, 2H), 1.42 – 1.17 (m, 6H), 0.89 (t, *J* = 6.9 Hz, 3H). <sup>13</sup>C NMR (126 MHz, CDCl<sub>3</sub>) δ 217.7, 138.7, 57.6, 56.5, 31.8, 28.9, 27.0, 22.7, 14.2 ppm. HRMS (MALDI<sup>+</sup>, FT-ICR, dithranol) *m/z* = 260.0595 [M + H<sup>+</sup>], calcd for (C<sub>11</sub>H<sub>18</sub>NS<sub>3</sub><sup>+</sup>) = 260.0596.

## Compound 8

A mixture of compound **7** (311 mg, 1.20 mmol) and DDQ (599 mg, 2.64 mmol) in anhydrous PhMe (15 mL) was heated to reflux for 2 hours. The reaction mixture was then cooled to rt and filtered. The filtrate was washed with 10% aqueous NaOH (3 × 10 mL), dried over MgSO<sub>4</sub>, and filtered. The organic phase was then filtered through a silica plug (SiO<sub>2</sub>, PhMe) and concentrated under reduced pressure. The residue was purified by flash column chromatography (SiO<sub>2</sub>, 10% EtOAc/heptane), yielding compound **8** (220 mg, 71%) as a brown oil. *R*<sub>f</sub> = 0.33 (20% EtOAc/heptane). <sup>1</sup>H NMR (500 MHz, (CD<sub>3</sub>)<sub>2</sub>SO) δ 7.15 (s, 2H), 4.02 (t, *J* = 7.1 Hz, 2H), 1.71 (p, *J* = 7.1 Hz, 2H), 1.46 – 1.04 (m, 6H), 0.84 (t, *J* = 7.9 Hz, 3H) ppm. <sup>13</sup>C NMR (126 MHz, (CD<sub>3</sub>)<sub>2</sub>SO) δ 219.5, 121.0, 113.3, 50.3, 30.9, 30.7, 25.6, 22.0,

13.8 ppm. HRMS (MALDI<sup>+</sup>, FT-ICR, dithranol)  $m/z = 258.0439$  [M + H<sup>+</sup>], calcd for (C<sub>11</sub>H<sub>16</sub>NS<sub>3</sub><sup>+</sup>) = 258.0439.

### Compound 10

A solution of **1** (85 mg, 223  $\mu$ mol) and **7** (92 mg, 354  $\mu$ mol) in anhydrous toluene (5 mL) and P(OEt)<sub>3</sub> (10 mL) was heated to reflux for 5 h, resulting in a color change from red to dark red. The reaction mixture was then allowed to cool to rt before it was concentrated under reduced pressure. The resulting dark red solid was purified by flash column chromatography using Sepacore<sup>®</sup> Flash Systems X10/X50 (SiO<sub>2</sub>, 1%–10% EtOAc/heptane), and recrystallization from CH<sub>2</sub>Cl<sub>2</sub>/MeOH followed by centrifugation yielded **10** (54 mg, 40%) as a dark red solid.  $R_f = 0.32$  (20% EtOAc/heptane). M.p.: 180-182 °C. <sup>1</sup>H NMR (500 MHz, CD<sub>2</sub>Cl<sub>2</sub>)  $\delta$  8.02 (d,  $J = 0.8$  Hz, 1H), 7.94 (d,  $J = 0.8$  Hz, 1H), 7.87 (d,  $J = 1.6$  Hz, 1H), 7.78 (d,  $J = 8.0$  Hz, 1H), 7.68 (dd,  $J = 1.7, 0.9$  Hz, 1H), 7.59 – 7.51 (m, 2H), 7.42 (dd,  $J = 8.0, 1.6$  Hz, 1H), 3.91 (s, 4H), 2.80 (t,  $J = 7.4$  Hz, 2H), 1.53 (s, 9H), 1.45 (s, 9H), 1.59 – 1.54 (m, 2H), 1.42 – 1.33 (m, 6H), 0.92 (t,  $J = 7.1$ , 3H) ppm. <sup>13</sup>C NMR (126 MHz, CD<sub>2</sub>Cl<sub>2</sub>)  $\delta$  193.9, 152.8, 151.2, 143.5, 142.7, 142.6, 138.4, 137.7, 135.9, 134.9, 132.6, 132.3, 131.9, 131.7, 123.6, 121.8, 121.5, 120.2, 119.9, 119.7, 115.7, 114.7, 57.5, 57.4, 57.0, 35.5, 35.4, 32.2, 31.9, 31.4, 29.2, 27.3, 23.1, 14.3 ppm; one sp<sup>3</sup>-C signal and four sp<sup>2</sup>-C signals missing, presumably due to overlap. HRMS (MALDI<sup>+</sup>, FT-ICR, dithranol)  $m/z = 606.2866$  [M + H<sup>+</sup>], calcd for (C<sub>39</sub>H<sub>44</sub>NOS<sub>2</sub><sup>+</sup>) = 606.2859.

### Compound 11

#### *Method 1 – from IF dione 1*

A solution of **1** (89 mg, 226  $\mu$ mol) and **8** (95 mg, 350  $\mu$ mol) in anhydrous toluene (5 mL) and P(OEt)<sub>3</sub> (10 mL) was heated to reflux for 5 h, resulting in a color change from orange to dark red. The reaction mixture was then allowed to cool to rt before it was concentrated under

reduced pressure. The resulting dark red solid was purified by flash column chromatography (SiO<sub>2</sub>, 20% EtOAc/heptane), and recrystallization from CH<sub>2</sub>Cl<sub>2</sub>/MeOH followed by centrifugation yielded **11** (74 mg, 59%) as a red solid.

*Method 2 – from 10*

To a solution of **10** (50 mg, 83 μmol) in PhCl (10 mL) was added DDQ (49 mg, 216 μmol), before it was heated to reflux for 4 h. The reaction mixture was then allowed to cool to rt before it was filtered through a silica plug (SiO<sub>2</sub>, CH<sub>2</sub>Cl<sub>2</sub>) and concentrated under reduced pressure. The residue was purified by flash column chromatography (SiO<sub>2</sub>, 10% EtOAc/heptane), and recrystallization from CH<sub>2</sub>Cl<sub>2</sub>/MeOH followed by centrifugation yielded **11** (29 mg, 58%) as a red solid.

*Method 3 – from 12*

A solution of **12** (22.0 mg, 42.3 μmol) in anhydrous DMF (4 mL) was degassed with Ar for 15 min before NaH (60% in mineral oil suspension, 19.3 mg, 483 μmol) was added, and the reaction mixture was stirred at rt for 15 min resulting in a color change from dark red to dark blue. Then, 1-bromohexane (0.06 mL, 42 μmol) was added, and the reaction mixture was stirred at rt for 2 h, resulting in a color change to dark red. Brine (40 mL) was added dropwise under stirring, and the reaction mixture was extracted with CH<sub>2</sub>Cl<sub>2</sub> (80 mL, then 2 × 50 mL). The combined organic phases were washed with brine (3 × 100 mL), dried over MgSO<sub>4</sub>, filtered, and concentrated under reduced pressure. The residue was purified by flash column chromatography (SiO<sub>2</sub>, 10% EtOAc/heptane), yielding **11** (20.6 mg, 91%) as a red solid. *R*<sub>f</sub> = 0.28 (20% EtOAc/heptane). M.p.: 224-225 °C. <sup>1</sup>H NMR (500 MHz, (CD<sub>3</sub>)<sub>2</sub>SO) δ 8.21 (s, 1H), 8.20 (s, 1H), 8.03 (d, *J* = 8.0 Hz, 1H), 8.02 (d, *J* = 1.6 Hz, 1H), 7.83 (d, *J* = 8.0 Hz, 1H), 7.66 (dd, *J* = 8.0, 1.9 Hz, 1H), 7.61 (d, *J* = 1.9 Hz, 1H), 7.45 (dd, *J* = 8.0, 1.6 Hz, 1H), 7.26 (d, *J* = 2.1 Hz, 1H), 7.24 (d, *J* = 2.1, 1H), 4.04 (t, *J* = 7.1 Hz, 2H), 1.76 – 1.69 (m, 2H), 1.43 (s, 9H), 1.34 (s, 9H), 1.30 – 1.25 (m, 6H), 0.87 (t, *J* = 7.1 Hz, 3H) ppm. <sup>13</sup>C NMR

(126 MHz, (CD<sub>3</sub>)<sub>2</sub>SO)  $\delta$  192.7, 155.12, 152.1, 150.3, 142.5, 141.8, 141.8, 137.4, 136.9, 134.6, 133.8, 131.8, 130.6, 123.0, 120.5, 120.4, 120.0, 119.7, 119.3, 116.8, 116.6, 115.8, 114.4, 114.1, 113.8, 50.3, 39.5, 34.9, 34.8, 31.5, 31.0, 30.9, 30.8, 25.6, 22.0, 13.9 ppm; five sp<sup>2</sup>-C signals missing, presumably due to overlap. HRMS (MALDI<sup>+</sup>, FT-ICR, dithranol)  $m/z$  = 604.2723 [M + H<sup>+</sup>], calcd for (C<sub>35</sub>H<sub>41</sub>NOS<sub>2</sub><sup>+</sup>) = 604.2702.

## Compound 12

A solution of NaOMe was prepared from Na (182 mg, 7.92 mmol) and MeOH (3 mL) and stirred for 0.5 h. It was then added dropwise to a solution of **4** (251 mg, 0.372 mmol) in anhydrous THF (35 mL) and anhydrous MeOH (35 mL), resulting in a color change from orange to dark red. The reaction mixture was stirred for 1.5 h at rt before H<sub>2</sub>O (50 mL) followed by aqueous HCl (1 M, 8 mL) were added. The resulting suspension was extracted with CH<sub>2</sub>Cl<sub>2</sub> (200 mL), and the organic phase was washed with H<sub>2</sub>O (3 × 120 mL), dried over MgSO<sub>4</sub>, filtered, and concentrated under reduced pressure. The residue was filtered through a silica plug (SiO<sub>2</sub>, CH<sub>2</sub>Cl<sub>2</sub>) and concentrated under reduced pressure, yielding **12** (168 mg, 87%) as golden dark red crystals.  $R_f$  = 0.32 (30% EtOAc/heptane). M.p.: 240 °C (decomp.). The compound decomposes in CDCl<sub>3</sub>. <sup>1</sup>H NMR (500 MHz, (CD<sub>3</sub>)<sub>2</sub>SO)  $\delta$  11.68 (t,  $J$  = 2.8 Hz, 1H), 8.22 (s, 1H), 8.20 (s, 1H), 8.05 – 8.02 (m, 2H), 7.83 (d,  $J$  = 7.8 Hz, 1H), 7.65 (dd,  $J$  = 7.8, 2.0 Hz, 1H), 7.61 (d,  $J$  = 2.0 Hz, 1H), 7.45 (dd,  $J$  = 8.2, 1.7 Hz, 1H), 7.25 (dd,  $J$  = 2.8, 1.9 Hz, 1H), 7.21 (dd,  $J$  = 2.8, 1.9 Hz, 1H), 1.43 (s, 9H), 1.34 (s, 9H) ppm. <sup>13</sup>C NMR (126 MHz, (CD<sub>3</sub>)<sub>2</sub>SO)  $\delta$  192.7, 155.9, 152.1, 150.3, 142.5, 141.9, 141.8, 137.4, 136.9, 134.7, 133.8, 131.8, 130.6, 123.0, 120.4, 120.0, 119.9, 119.5, 117.2, 117.3, 115.8, 114.5, 111.2, 111.0, 34.9, 34.8, 31.5, 30.9 ppm; five sp<sup>2</sup>-C signals missing, presumably due to overlap. HRMS (MALDI<sup>+</sup>, FT-ICR, dithranol)  $m/z$  = 520.1760 [M + H<sup>+</sup>], calcd for (C<sub>33</sub>H<sub>30</sub>NOS<sub>2</sub><sup>+</sup>) = 520.1763.

## Compound 14

A solution of **11** (100 mg, 0.166 mmol) in anhydrous toluene (6 mL) was added dropwise to an Ar-degassed solution of CBr<sub>4</sub> (264 mg, 0.796 mmol) and PPh<sub>3</sub> (406 mg, 1.55 mmol) in anhydrous toluene (10 mL). The reaction mixture was degassed with Ar for another 10 min before it was heated to reflux for 5 h, resulting in a color change from dark red to orange. Additional CBr<sub>4</sub> (221 mg, 0.666 mmol) and PPh<sub>3</sub> (402 mg, 1.53 mmol) were added, and the reaction mixture was heated to reflux for another 19 h before it was allowed to cool to rt and filtered. The filtrate was concentrated under reduced pressure, and the resulting orange/yellow solid was purified by flash column chromatography (SiO<sub>2</sub>, 15% EtOAc/heptane). The resulting solid was triturated with heptane (4 × 2 mL) yielding **14** (72 mg, 57%) as an orange solid. The combined supernatants were concentrated under reduced pressure and the obtained orange oil solidified upon cooling in the freezer overnight. The solid was triturated with heptane (3 × 2 mL), yielding additional **14** (9 mg) as an orange solid (total yield: 81 mg, 64%). *R*<sub>f</sub> = 0.30 (15% EtOAc/heptane). M.p.: 158 °C (decomp.). <sup>1</sup>H NMR (500 MHz, CDCl<sub>3</sub>) δ 9.01 (s, 1H), 8.71 (d, *J* = 1.7 Hz, 1H), 8.27 (d, *J* = 1.3 Hz, 1H), 8.06 (s, 1H), 7.78 (d, *J* = 8.0 Hz, 1H), 7.75 (d, *J* = 7.9 Hz, 1H), 7.48 (dd, *J* = 8.0, 1.7 Hz, 1H), 7.38 (dd, *J* = 7.9, 1.3 Hz, 1H), 6.75 (s, 2H), 3.96 (t, *J* = 7.3 Hz, 2H), 1.82 (q, *J* = 7.1 Hz, 2H), 1.47 (s, 9H), 1.40 (s, 9H), 1.36 – 1.31 (m, 6H), 0.90 (t, *J* = 7.1, 3H) ppm. <sup>13</sup>C NMR (126 MHz, CDCl<sub>3</sub>) δ 150.3, 150.3, 149.2, 139.9, 139.5, 138.9, 138.8, 138.1, 137.3, 135.8, 126.6, 123.2, 122.9, 122.2, 120.6, 118.9, 118.9, 118.8, 118.6, 117.2, 114.3, 112.4, 112.3, 88.7, 51.3, 35.3, 35.3, 31.9, 31.7, 31.5, 26.5, 22.7, 14.2, 1.2 ppm; six sp<sup>2</sup>-C signals missing, presumably due to overlap. HRMS (MALDI<sup>+</sup>, FT-ICR, dithranol) *m/z* = 759.1092 [*M*<sup>+</sup>], calcd for (C<sub>40</sub>H<sub>41</sub>Br<sub>2</sub>NS<sub>2</sub><sup>+</sup>) = 759.1021.



## Compound 15

To a solution of **11** (80 mg, 0.132 mmol) in anhydrous toluene (20 mL) was added  $\text{TiCl}_4$  (0.2 mL, 1.82 mmol) dropwise, resulting in a color change from dark red to black. Dropwise addition of diethyl malonate (0.2 mL, 1.32 mmol) and pyridine (0.3 mL, 3.72 mmol) resulted in another color change to dark red. The reaction mixture was stirred at rt for 20 h before additional  $\text{TiCl}_4$  (0.2 mL, 1.82 mmol) and diethyl malonate (0.2 mL, 1.32 mmol) were added dropwise, and the reaction mixture was stirred for another 16 h and then filtered. The filtrate was diluted with toluene (150 mL), washed with brine (3 × 100 mL), dried over  $\text{MgSO}_4$ , filtered, and concentrated under reduced pressure. The resulting dark red oil was purified by flash column chromatography ( $\text{SiO}_2$  neutralized with  $\text{Et}_3\text{N}$ , 35% EtOAc/heptane), yielding **15** (22 mg, 22%) as a deep red thin film after freeze-drying for five days. Minor impure fractions were combined and concentrated under reduced pressure. The obtained film was triturated with pentane (4 × 1 mL) to yield additional **15** (10 mg) as a deep red thin film (total yield: 32 mg, 32%).  $R_f = 0.30$  (20% EtOAc/heptane).  $^1\text{H}$  NMR (500 MHz,  $(\text{CD}_3)_2\text{CO}$ )  $\delta$  8.34 (s, 1H), 8.31 (s, 1H), 8.10 (d,  $J = 1.6$  Hz, 1H), 7.95 (d,  $J = 1.7$  Hz, 1H), 7.82 (d,  $J = 8.0$  Hz, 1H), 7.79 (d,  $J = 8.0$  Hz, 1H), 7.57 (dd,  $J = 8.0, 1.7$  Hz, 1H), 7.46 (dd,  $J = 8.0, 1.6$  Hz, 1H), 7.14 (s, 2H), 4.55 (q,  $J = 7.2$  Hz, 2H), 4.48 (q,  $J = 7.2$  Hz, 2H), 4.10 (t,  $J = 7.1$  Hz, 2H), 1.85 (quin,  $J = 7.1$  Hz, 2H), 1.46 (s, 9H), 1.44 – 1.38 (m, 6H), 1.37 (s, 9H), 1.36 – 1.25 (m, 6H), 0.88 (t,  $J = 5.0$  Hz, 3H) ppm.  $^{13}\text{C}$  NMR (126 MHz,  $(\text{CD}_3)_2\text{CO}$ )  $\delta$  166.4, 166.2, 152.8, 151.5, 151.2, 144.5, 141.4, 140.8, 140.5, 138.7, 138.0, 137.2, 135.8, 133.5, 129.2, 123.9, 123.2, 121.8, 121.1, 120.1, 119.7, 118.6, 118.4, 118.1, 115.0, 114.3, 114.1, 62.8, 62.7, 51.6, 35.8, 35.7, 32.3, 32.1, 32.1, 31.8, 29.8, 31.7, 27.0, 23.2, 14.4, 14.3 ppm; 5  $\text{sp}^2$  carbon signals missing, presumably due to overlap. HRMS (MALDI<sup>+</sup>, FT-ICR, dithranol)  $m/z = 745.3493$  [ $\text{M}^+$ ], calcd for  $(\text{C}_{46}\text{H}_{51}\text{NO}_4\text{S}_2^+)$  = 745.3254.

## Compound 17

To a flame-dried vial equipped with a magnetic stirrer bar were added **3** (70 mg, 212  $\mu\text{mol}$ ), **5** (24 mg, 135  $\mu\text{mol}$ ), and Lawesson's reagent (63 mg, 155  $\mu\text{mol}$ ). Dry toluene (5 mL) degassed with  $\text{N}_2$  for 15 min was added, and the solution was heated to 105  $^\circ\text{C}$  for 18.5 h. The reaction mixture was then allowed to cool to rt, diluted with toluene (10 mL), and washed with 1 M NaOH (3  $\times$  20 mL), and then with  $\text{H}_2\text{O}$  (20 mL). The organic phase was dried over  $\text{MgSO}_4$  and concentrated under reduced pressure. The residue was purified by flash column chromatography twice ( $\text{SiO}_2$ , 1) 1% EtOAc/heptane, 2) 50%  $\text{CH}_2\text{Cl}_2$ /heptane), yielding **17** (8.6 mg, 18  $\mu\text{mol}$ , 14%) as a yellow solid.  $R_f = 0.18$  (50%  $\text{CH}_2\text{Cl}_2$ /heptane). M.p.: 255  $^\circ\text{C}$  (decomp.).  $^1\text{H}$  NMR (500 MHz,  $\text{CDCl}_3$ )  $\delta$  7.95 (d,  $J = 8.0$  Hz, 2H), 7.80 (d,  $J = 7.2$  Hz, 2H), 7.80 (d,  $J = 8.0$  Hz, 2H), 7.40 (t,  $J = 7.7$  Hz, 2H), 7.34 (t,  $J = 7.2$ , 2H), 7.33 (d,  $J = 7.7$  Hz, 2H), 7.15 (s, 2H), 2.42 (s, 2H) ppm.  $^{13}\text{C}$  NMR (126 MHz,  $\text{CDCl}_3$ )  $\delta$  148.2, 146.0 138.8, 137.5, 136.8, 135.6, 130.6, 127.4, 127.4, 126.5, 126.4, 123.9, 120.0, 111.5, 22.0 ppm. HRMS (MALDI $^+$ , FT-ICR, dithranol)  $m/z = 459.0421$  [ $\text{M}^+$ ], calcd for ( $\text{C}_{25}\text{H}_{17}\text{NO}_2\text{S}_3^+$ ) = 459.0416.

## Compound 20

To a solution of 1-phenyl-2-trimethylsilylacetylene (0.10 mL, 0.517 mmol) in anhydrous THF (25 mL) and MeOH (25 mL) was added  $\text{K}_2\text{CO}_3$  (0.286 g, 2.07 mmol). The reaction mixture was stirred at rt for 1 h until TLC analysis showed full conversion. It was then filtered through a plug of  $\text{SiO}_2$  ( $\text{CH}_2\text{Cl}_2$  as eluent) and concentrated under reduced pressure until the total volume was approx. 5 mL.  $\text{Et}_3\text{N}$  (10 mL) was added to the solution, and it was concentrated under reduced pressure until the total volume was approx. 5 mL ( $\text{Et}_3\text{N}$ ). The freshly prepared phenylacetylene in  $\text{Et}_3\text{N}$  (approx. 5 mL) was then added to a flask along with **18** (108 mg, 0.124 mmol), anhydrous THF (18 mL), and  $\text{Et}_3\text{N}$  (7 mL), and the solution was degassed with Ar.  $\text{P}(t\text{-Bu})_3$  (0.14 mL, 1.0 M in toluene),  $\text{Pd}_2\text{dba}_3$  (17 mg, 19  $\mu\text{mol}$ ), and  $\text{CuI}$  (4 mg, 19  $\mu\text{mol}$ ) were added, and the reaction mixture was stirred at rt overnight under an

Ar atmosphere. The dark brown/red reaction mixture was filtered through a plug of SiO<sub>2</sub> (CH<sub>2</sub>Cl<sub>2</sub> as eluent) and purified by flash column chromatography (SiO<sub>2</sub> deactivated by 1% Et<sub>3</sub>N, 10% CH<sub>2</sub>Cl<sub>2</sub>/heptane), yielding **20** as a red solid (44 mg, 0.048 mmol, 39%). *R*<sub>f</sub> = 0.55 (50% CH<sub>2</sub>Cl<sub>2</sub>/heptane). <sup>1</sup>H NMR (500 MHz, CD<sub>2</sub>Cl<sub>2</sub>) δ 9.10 (d, *J* = 0.8 Hz, 1H), 8.82 (d, *J* = 1.7 Hz, 1H), 7.96 (d, *J* = 0.8 Hz, 1H), 7.81 – 7.78 (m, 2H), 7.77 (d, *J* = 1.5 Hz, 1H), 7.73 – 7.69 (m, 3H), 7.60 (d, *J* = 7.9 Hz, 1H), 7.56 – 7.51 (m, 3H), 7.47 – 7.44 (m, 4H), 7.33 (dd, *J* = 8.0, 1.6 Hz, 1H), 3.05 – 2.97 (m, 4H), 1.79 – 1.72 (m, 4H), 1.50 – 1.46 (m, 4H), 1.44 (s, 9H), 1.36 (s, 9H), 1.35 – 1.31 (m, 8H), 0.92 – 0.88 (m, 6H) ppm. *Another <sup>1</sup>H NMR spectrum measured in C<sub>6</sub>D<sub>6</sub> to disrupt π-stacking:* <sup>1</sup>H NMR (500 MHz, C<sub>6</sub>D<sub>6</sub>) δ 9.59 (s, 1H), 9.20 (d, *J* = 1.7 Hz, 1H), 8.32 (s, 1H), 8.06 (d, *J* = 1.6 Hz, 1H), 7.82 (d, *J* = 7.9 Hz, 1H), 7.65 – 7.59 (m, 4H), 7.34 (dd, *J* = 7.9, 1.8 Hz, 1H), 7.28 (dd, *J* = 8.0, 1.6 Hz, 1H), 7.09 – 6.99 (m, 7H), 2.75 – 2.69 (m, 4H), 1.61 – 1.54 (m, 4H), 1.42 (s, 9H), 1.32 (s, 9H), 1.29 – 1.19 (m, 8H), 1.17 – 1.11 (m, 4H), 0.88 – 0.82 (m, 6H) ppm. <sup>13</sup>C NMR (126 MHz, CD<sub>2</sub>Cl<sub>2</sub>) δ 151.2, 150.6, 146.2, 139.8, 139.2, 138.9, 138.5, 138.5, 137.8, 137.6, 135.9, 135.6, 132.2, 132.2, 129.8, 129.6, 129.5, 129.2, 129.0, 128.8, 127.3, 123.6, 123.4, 123.1, 122.9, 121.6, 120.3, 119.2, 117.3, 114.3, 99.9, 98.6, 98.2, 90.0, 89.2, 37.1, 37.0, 35.4, 35.4, 31.9, 31.8, 31.8, 31.8, 30.4, 30.3, 28.7, 23.0, 23.0, 14.2, 14.2 ppm; one sp<sup>2</sup>-C signal and one sp<sup>3</sup>-C signal missing, presumably due to overlap. *Another <sup>13</sup>C NMR spectrum measured in C<sub>6</sub>D<sub>6</sub> to disrupt π-stacking could not be obtained due to low concentration of the measured sample.* HRMS (MALDI<sup>+</sup>, FT-ICR, dithranol) *m/z* = 910.3749 [M<sup>+</sup>], calcd for (C<sub>60</sub>H<sub>62</sub>S<sub>4</sub><sup>+</sup>) = 910.3729.

## Compound 21

To a solution of 4-[(trimethylsilyl)ethynyl]benzotrile (0.319 g, 1.6 mmol) in anhydrous THF (25 mL) and MeOH (25 mL) was added K<sub>2</sub>CO<sub>3</sub> (0.885 g, 6.4 mmol). The reaction mixture was stirred at rt for 2 h until TLC analysis showed full conversion. It was then filtered through a plug of SiO<sub>2</sub> (CH<sub>2</sub>Cl<sub>2</sub> as eluent) and concentrated under reduced pressure until the total

volume was approx. 5 mL. Et<sub>3</sub>N (10 mL) was added to the solution, and it was concentrated under reduced pressure until the total volume was approx. 5 mL (Et<sub>3</sub>N). The freshly prepared 4-ethynylbenzonitrile in Et<sub>3</sub>N (approx. 5 mL) was then added to a flask along with **18** (185 mg, 0.21 mmol) and anhydrous THF (15 mL), and the solution was degassed vigorously with Ar. Pd(PPh<sub>3</sub>)<sub>2</sub>Cl<sub>2</sub> (7 mg, 0.01 mmol) and Cul (2 mg, 0.01 mmol) were added, and the reaction mixture was stirred at 45–50 °C overnight under a N<sub>2</sub> atmosphere. The dark brown/red reaction mixture was filtered through a plug of SiO<sub>2</sub> (CH<sub>2</sub>Cl<sub>2</sub> as eluent) and purified by flash column chromatography (SiO<sub>2</sub>, 50% CH<sub>2</sub>Cl<sub>2</sub>/heptane), yielding **21** as a dark red solid (45 mg, 0.05 mmol, 22%). *R*<sub>f</sub> = 0.29 (100% toluene). <sup>1</sup>H NMR (500 MHz, CDCl<sub>3</sub>) δ 8.87 (s, 1H), 8.60 (d, *J* = 1.7 Hz, 1H), 7.87 (s, 1H), 7.78 – 7.63 (m, 9H), 7.61 (d, *J* = 8.0 Hz, 1H), 7.43 (d, *J* = 8.0 Hz, 1H), 7.38 (dd, *J* = 7.9, 1.8 Hz, 1H), 7.27 (dd, *J* = 8.0, 1.6 Hz, 1H), 2.96 – 2.89 (m, 4H), 1.72 – 1.65 (m, 4H), 1.44 – 1.41 (m, 3H), 1.38 (s, 9H), 1.35 – 1.27 (m, 9H), 1.27 (s, 9H), 0.86 – 0.81 (m, 6H) ppm. A <sup>13</sup>C NMR spectrum could not be obtained due to low concentration of the measured sample. HRMS (MALDI<sup>+</sup>, FT-ICR, dithranol) *m/z* = 960.3652 [*M*<sup>+</sup>], calcd for (C<sub>62</sub>H<sub>60</sub>N<sub>2</sub>S<sub>4</sub><sup>+</sup>) = 960.3634.

## Compound 22

In a manner similar to [1], K<sub>2</sub>CO<sub>3</sub> (180 mg, 1.30 mmol) was added to a solution of triisopropyl((2-((trimethylsilyl)ethynyl)phenyl)ethynyl)silane (220 mg, 0.620 mmol) in THF (10 mL) and MeOH (10 mL), and the suspension was stirred at rt for 1 h before it was filtered through a plug of SiO<sub>2</sub> (CH<sub>2</sub>Cl<sub>2</sub> as eluent) and concentrated in vacuum to a volume of approx. 10 mL. Et<sub>3</sub>N (10 mL) was added, and the solution was further concentrated to a volume of approx. 2 mL. Additional Et<sub>3</sub>N (10 mL), anhydrous THF (10 mL), and **18** (102 mg, 0.144 mmol) were added, and the combined solution was thoroughly degassed with Ar prior to addition of Pd(PPh<sub>3</sub>)<sub>2</sub>Cl<sub>2</sub> (20 mg, 0.028 mmol) and Cul (5.0 mg, 0.026 mmol). The resulting reaction mixture was stirred at rt under an Ar atmosphere for 14 h before it was

filtered through a plug of SiO<sub>2</sub> (CH<sub>2</sub>Cl<sub>2</sub> as eluent) and concentrated under reduced pressure. Flash column chromatography (SiO<sub>2</sub>, 10% CH<sub>2</sub>Cl<sub>2</sub>/heptane) yielded **22** (65 mg, 44%) as a red oil. *R<sub>f</sub>* = 0.35 (20% CH<sub>2</sub>Cl<sub>2</sub>/heptane). <sup>1</sup>H NMR (500 MHz, CDCl<sub>3</sub>) δ 9.12 (s, 1H), 8.80 (d, *J* = 1.7 Hz, 1H), 7.95 (s, 1H), 7.75 – 7.71 (m, 2H), 7.68 (d, *J* = 8.0 Hz, 1H), 7.66 – 7.60 (m, 2H), 7.58 – 7.54 (m, 1H), 7.53 (d, *J* = 8.0 Hz, 1H), 7.43 – 7.38 (m, 3H), 7.35 – 7.30 (m, 2H), 7.26 – 7.21 (m, 1H), 3.02 – 2.97 (m, 4H), 1.86 – 1.68 (m, 4H), 1.58 – 1.44 (m, 4H), 1.43 (s, 9H), 1.37 – 1.31 (m, 8H), 1.24 (s, 9H), 0.98 (s, 18H), 0.95 (s, 18H), 0.93 – 0.87 (m, 6H) ppm. <sup>13</sup>C NMR (126 MHz, CDCl<sub>3</sub>) δ 150.6, 150.0, 147.2, 139.6, 138.5, 138.5, 138.3, 137.6, 137.5, 137.3, 136.1, 135.8, 133.3, 133.0, 132.8, 132.3, 129.3, 128.6, 128.4, 128.2, 127.9, 126.8, 126.7, 126.3, 125.9, 123.3, 123.1, 122.0, 120.0, 119.4, 118.7, 117.5, 113.9, 105.1, 105.0, 100.1, 96.5, 96.5, 96.3, 96.1, 92.9, 92.2, 77.4, 36.9, 36.8, 35.2, 35.1, 31.9, 31.6, 31.5, 31.5, 30.1, 30.0, 28.5, 28.5, 22.7, 22.7, 18.7, 18.7, 14.2, 14.2, 11.4 ppm; one signal missing in the aromatic region and one signal missing in the aliphatic region, presumably due to overlap. HRMS (MALDI<sup>+</sup>, FT-ICR, dithranol) *m/z* = 1270.6417 [M<sup>+</sup>], calcd for (C<sub>82</sub>H<sub>102</sub>S<sub>4</sub>Si<sub>2</sub><sup>+</sup>) = 1270.6397.

### Compound 24

To a N<sub>2</sub>-degassed solution of **1** (56 mg, 0.14 mmol) in anhydrous toluene (20 mL) was added CBr<sub>4</sub> (191 mg, 0.576 mmol) and PPh<sub>3</sub> (300 mg, 1.14 mmol). The suspension was heated to reflux and stirred under a N<sub>2</sub> atmosphere for 4 h before it was cooled to rt, filtered through a plug of SiO<sub>2</sub> (CH<sub>2</sub>Cl<sub>2</sub> as eluent), and concentrated under reduced pressure. Flash column chromatography (10% CH<sub>2</sub>Cl<sub>2</sub>/heptane) yielded **24** (29 mg, 37%) as an orange solid. *R<sub>f</sub>* = 0.29 (20% CH<sub>2</sub>Cl<sub>2</sub>/heptane). <sup>1</sup>H NMR (500 MHz, CDCl<sub>3</sub>) δ 8.72 (d, *J* = 0.7 Hz, 1H), 8.69 (d, *J* = 1.7 Hz, 1H), 7.88 (d, *J* = 0.7 Hz, 1H), 7.72 (d, *J* = 1.7 Hz, 1H), 7.61 (d, *J* = 8.0 Hz, 1H), 7.53 – 7.49 (m, 2H), 7.46 (d, *J* = 8.0 Hz, 1H), 1.39 (s, 9H), 1.36 (s, 9H) ppm. <sup>13</sup>C NMR (126

MHz, CDCl<sub>3</sub>) δ 194.0, 152.9, 151.4, 144.0, 143.6, 142.2, 141.6, 139.6, 138.2, 137.1, 135.5, 134.9, 131.9, 127.2, 123.2, 121.8, 119.9, 119.4, 117.7, 115.2, 93.3, 35.4, 35.2, 31.7, 31.4 ppm. HRMS (MALDI<sup>+</sup>, FT-ICR, dithranol)  $m/z = 550.0371$  [M<sup>+</sup>], calcd for (C<sub>29</sub>H<sub>26</sub>Br<sub>2</sub>O<sup>+</sup>) = 550.0325.

### Compound 25

To a N<sub>2</sub>-degassed solution of **1** (250 mg, 0.633 mmol) in anhydrous toluene (50 mL) were added CBr<sub>4</sub> (900 mg, 2.71 mmol) and PPh<sub>3</sub> (1.40 mg, 5.34 mmol). The suspension was heated to reflux and stirred under a N<sub>2</sub> atmosphere for 2 h before it was cooled to rt, filtered through a plug of SiO<sub>2</sub> (CH<sub>2</sub>Cl<sub>2</sub> as eluent) and concentrated under reduced pressure. The crude material was re-dissolved in a minimum of CH<sub>2</sub>Cl<sub>2</sub> (approx. 5 mL) before addition of MeOH (20 mL) led to precipitation of a yellow solid. Trituration of the solids with MeOH (3 × 10 mL) yielded **25** (314 mg, 70%) as a yellow solid.  $R_f = 0.21$  (10% CH<sub>2</sub>Cl<sub>2</sub>/heptane). <sup>1</sup>H NMR (500 MHz, CDCl<sub>3</sub>) δ 8.83 (s, 2H), 8.69 (s, 2H), 7.61 (d,  $J = 7.9$  Hz, 2H), 7.47 (d,  $J = 7.9$  Hz, 2H), 1.39 (s, 18H) ppm. <sup>13</sup>C NMR (126 MHz, CDCl<sub>3</sub>) δ 150.8, 139.8, 139.6, 139.4, 138.4, 138.1, 126.8, 123.2, 119.0, 117.0, 91.0, 35.3, 31.7 ppm. HRMS (MALDI<sup>+</sup>, FT-ICR, dithranol)  $m/z = 705.8756$  [M<sup>+</sup>], calcd for (C<sub>30</sub>H<sub>26</sub>Br<sub>4</sub><sup>+</sup>) = 705.8722.

### Compound 26

To a N<sub>2</sub>-degassed solution of **25** (208 mg, 0.295 mmol) in THF (13 mL) and Et<sub>3</sub>N (13 mL) were added Ar-degassed triisopropylsilylacetylene (1.85 mL, 1.50 g, 8.26 mmol), Pd(PPh<sub>3</sub>)Cl<sub>2</sub> (0.0586 g, 0.0835 mmol), and CuI (0.0161 g, 0.0845 mmol). The reaction mixture was stirred for 25 h at rt under a N<sub>2</sub> atmosphere before it was filtered through a plug of SiO<sub>2</sub> (CH<sub>2</sub>Cl<sub>2</sub> as eluent) and concentrated under reduced pressure. The orange residue was purified by flash column chromatography (SiO<sub>2</sub>, 10% CH<sub>2</sub>Cl<sub>2</sub>/heptane), yielding **26** as red crystals (229 mg, 0.206 mmol, 70%).  $R_f = 0.58$  (10% CH<sub>2</sub>Cl<sub>2</sub>/heptane). <sup>1</sup>H NMR (500

MHz, CDCl<sub>3</sub>)  $\delta$  8.91 (m, 2H), 8.77 (m, 2H), 7.55 – 7.53 (d,  $J$  = 8 Hz, 2H), 7.34 – 7.32 (d,  $J$  = 8 Hz, 2H), 1.38 (s, 18H) ppm. <sup>13</sup>C NMR (126 MHz, CDCl<sub>3</sub>)  $\delta$  150.7, 145.6, 139.9, 139.5, 138.2, 138.1, 126.5, 123.1, 118.9, 116.9, 106.6, 106.5, 103.5, 102.7, 101.4, 35.2, 31.8, 19.0, 11.7 ppm. HRMS (MALDI<sup>+</sup>, FT-ICR, dithranol)  $m/z$  = 1111.7786 [M + H<sup>+</sup>], calcd for (C<sub>74</sub>H<sub>111</sub>Si<sub>4</sub><sup>+</sup>) = 1111.7757. Elemental analysis: C: 79.90%, H: 10.30%; calcd for C<sub>74</sub>H<sub>110</sub>Si<sub>4</sub>: C: 79.93%, H: 9.97%.

### Compound 27

In a manner similar to [1], K<sub>2</sub>CO<sub>3</sub> (300 mg, 2.17 mmol) was added to a solution of triisopropyl((2-((trimethylsilyl)ethynyl)phenyl)ethynyl)silane (376 mg, 1.06 mmol) in THF (10 mL) and MeOH (10 mL). The suspension was stirred at rt for 45 min before it was filtered through a plug of SiO<sub>2</sub> (CH<sub>2</sub>Cl<sub>2</sub> as eluent) and concentrated under reduced pressure to a volume of approx. 10 mL. Et<sub>3</sub>N (10 mL) was added, and the solution was further concentrated to a volume of approx. 2 mL. Additional Et<sub>3</sub>N (10 mL), anhydrous THF (10 mL), and **25** (150 mg, 0.212 mmol) were added, and the combined solution was thoroughly degassed with Ar before addition of Pd(PPh<sub>3</sub>)<sub>2</sub>Cl<sub>2</sub> (30 mg, 0.043 mmol) and CuI (8.0 mg, 0.042 mmol). The resulting reaction mixture was stirred at rt under an Ar atmosphere for 22 h before it was filtered through a plug of SiO<sub>2</sub> (CH<sub>2</sub>Cl<sub>2</sub> as eluent) and concentrated under reduced pressure. Flash column chromatography (10% CH<sub>2</sub>Cl<sub>2</sub>/heptane) yielded **27** (75 mg, 23%) as an orange solid.  $R_f$  = 0.31 (20% CH<sub>2</sub>Cl<sub>2</sub>/heptane). <sup>1</sup>H NMR (500 MHz, CDCl<sub>3</sub>)  $\delta$  8.96 (s, 2H), 8.74 (d,  $J$  = 1.7 Hz, 2H), 7.74 – 7.67 (m, 2H), 7.65 – 7.58 (m, 4H), 7.57 – 7.52 (m, 2H), 7.43 – 7.38 (m, 4H), 7.36 (d,  $J$  = 8.0 Hz, 2H), 7.34 – 7.30 (m, 4H), 7.24 (dd,  $J$  = 8.0, 1.7 Hz, 2H), 1.20 (s, 18H), 0.98 (s, 36H), 0.97 (s, 36H) ppm. <sup>13</sup>C NMR (126 MHz, CDCl<sub>3</sub>)  $\delta$  150.5, 147.0, 139.9, 139.2, 138.1, 138.1, 133.3, 132.9, 132.8, 132.3, 128.7, 128.5, 128.2, 127.9, 127.0, 126.6, 126.3, 125.8, 125.8, 122.9, 119.0, 117.0, 105.0, 105.0, 101.1, 96.9,

96.9, 96.4, 96.2, 92.6, 92.0, 35.1, 31.5, 18.7, 18.7, 11.4, 11.4 ppm. HRMS (MALDI<sup>+</sup>, FT-ICR, dithranol)  $m/z = 1512.9086$  [ $M^+$ ], calcd for ( $C_{106}H_{127}Si_4^+$ ) = 1512.9043.



## UV-vis absorption studies of compounds **10** and **11** (different solvents)

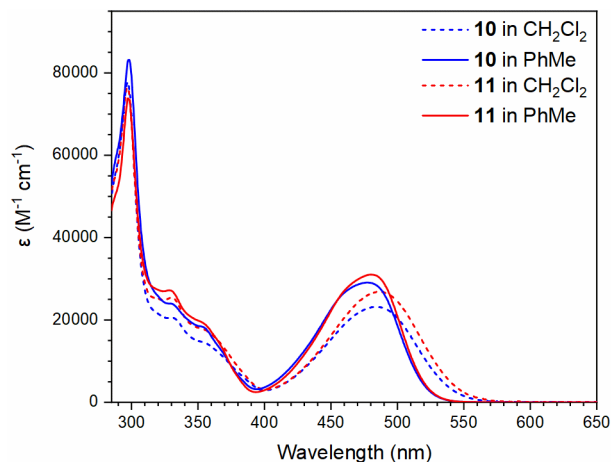

**Figure S1:** UV-vis absorption spectra of compounds **10** and **11** in PhMe and CH<sub>2</sub>Cl<sub>2</sub> at 25 °C. The redshift of the longest-wavelength absorption when changing the solvent to CH<sub>2</sub>Cl<sub>2</sub> indicates some charge-transfer character of this absorption.

## UV-vis absorption studies of **20** (degradation studies)

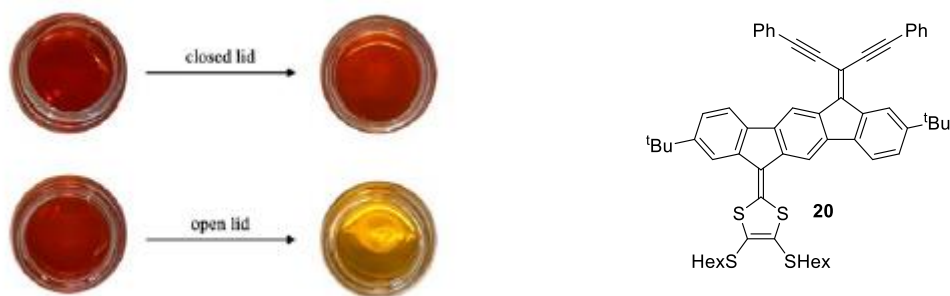

**Figure S2:** Visual experiment of compound **20** dissolved in CH<sub>2</sub>Cl<sub>2</sub> in two vials, one with closed lid (top) and one with open lid (bottom), to observe the impact of the presence of oxygen. The solutions were not shielded from light.

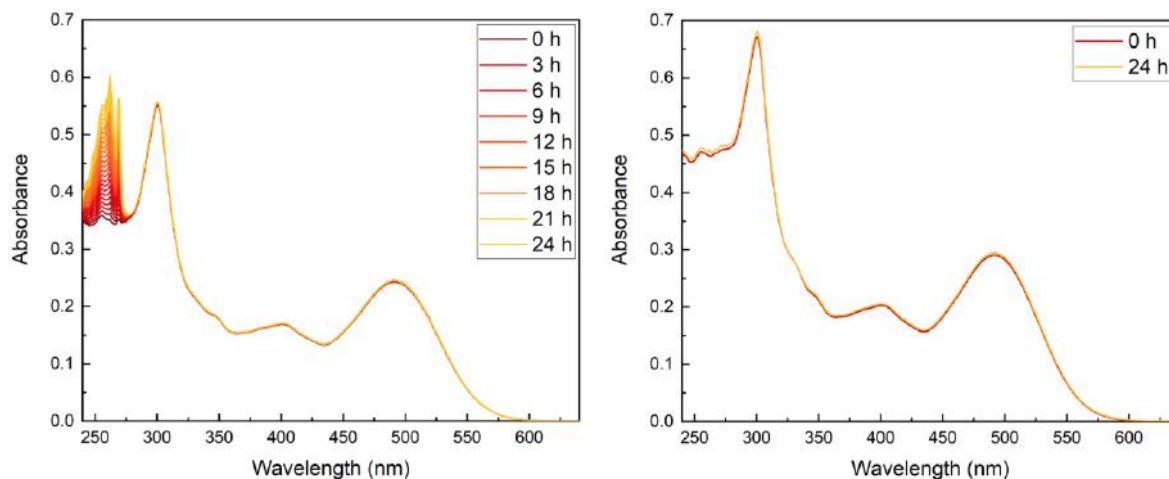

**Figure S3:** UV-vis absorption spectra of **20** in  $\text{CH}_2\text{Cl}_2$  at 25 °C. Left: Recorded for 0–24 h in the presence of oxygen and absence of light; the absorption from 280 nm to 600 nm remains unchanged; however, an increase was observed in the absorption between 240 nm and 280 nm. Right: Recorded at 0 h and 24 h in the absence of both oxygen (sample degassed with argon) and light; no changes in the absorption were observed, indicating that the sample was stable in the absence of oxygen and light.

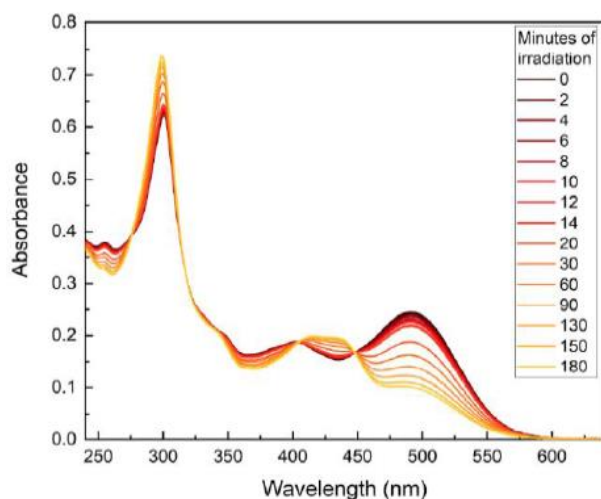

**Figure S4:** UV-vis absorption spectra of **20** in  $\text{CH}_2\text{Cl}_2$  at 25 °C irradiated at 565 nm for 0–180 min in the presence of oxygen; a decrease in the absorption was observed between 475 nm and 575 nm, while an increase in the absorption was observed between 400 nm and 450 nm. These changes in absorption might explain the change in color observed for the samples in Figure S2.

# $^1\text{H}$ and $^{13}\text{C}$ NMR spectra

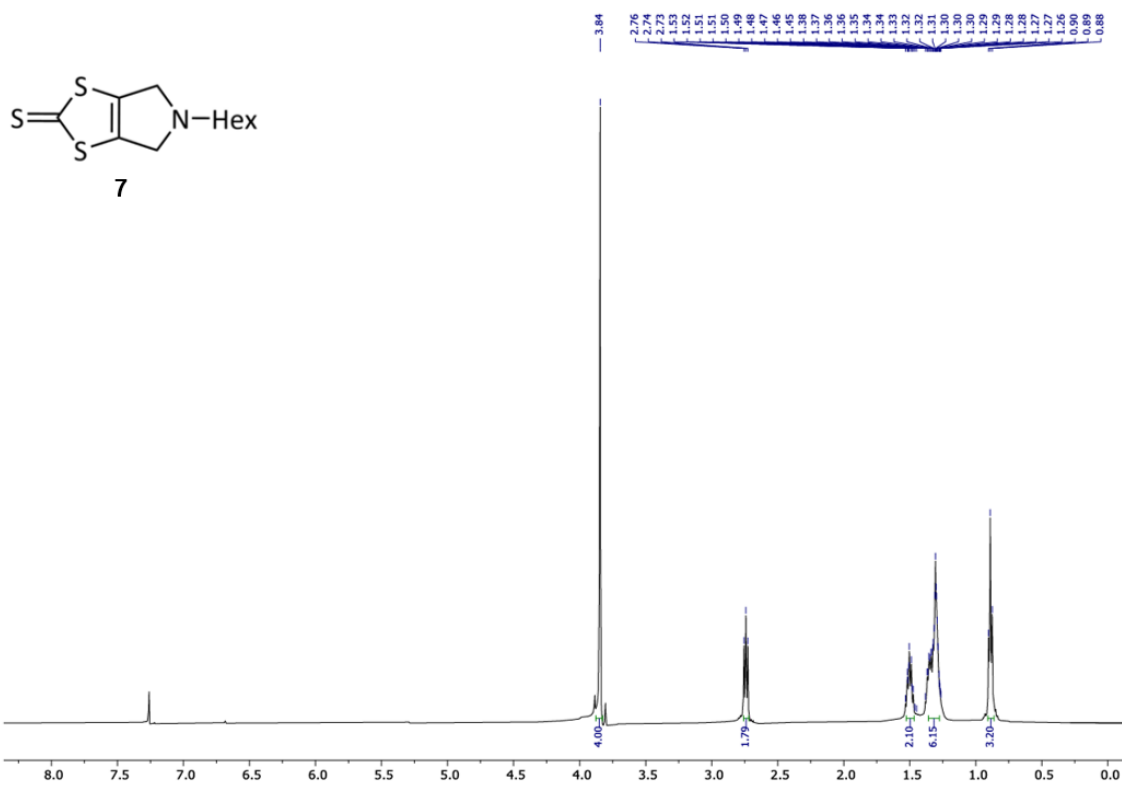

$^1\text{H}$  NMR spectrum (500 MHz,  $\text{CDCl}_3$ ) of **7**.

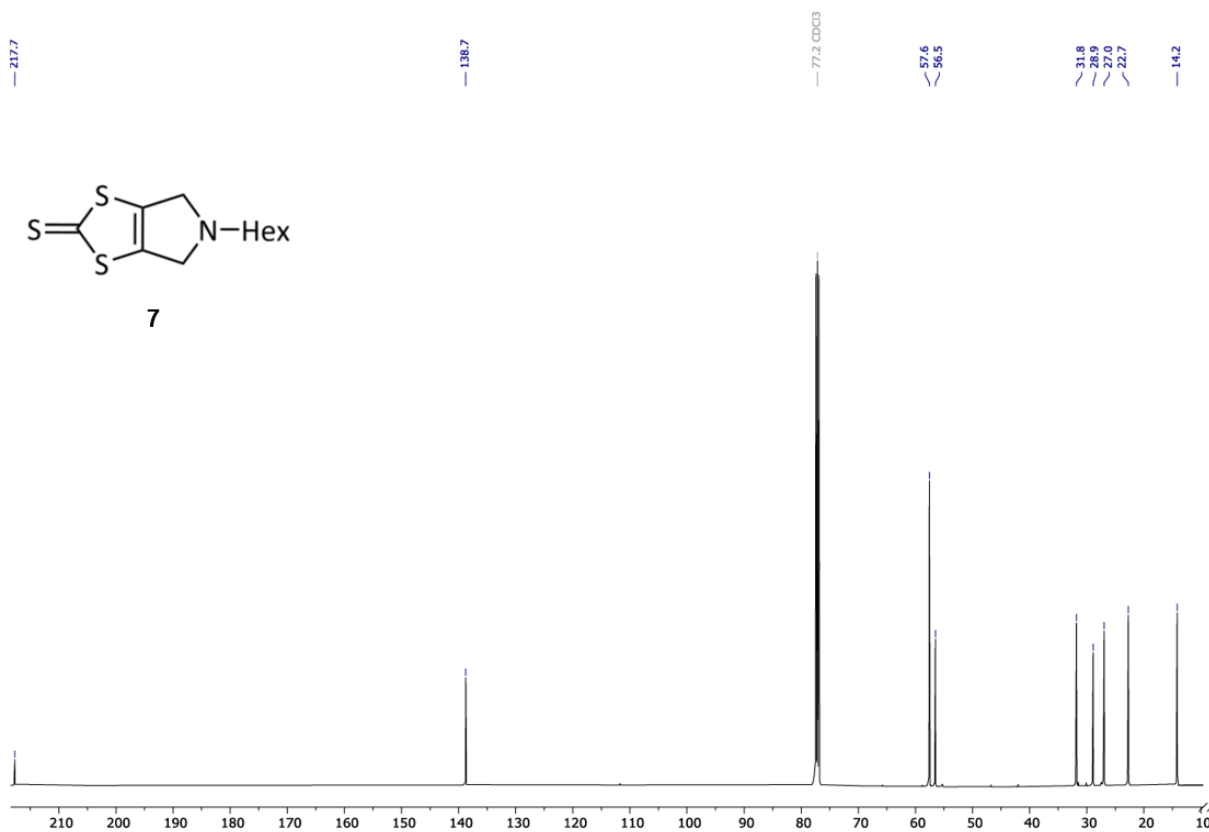

$^{13}\text{C}$  NMR spectrum (126 MHz,  $\text{CDCl}_3$ ) of **7**.

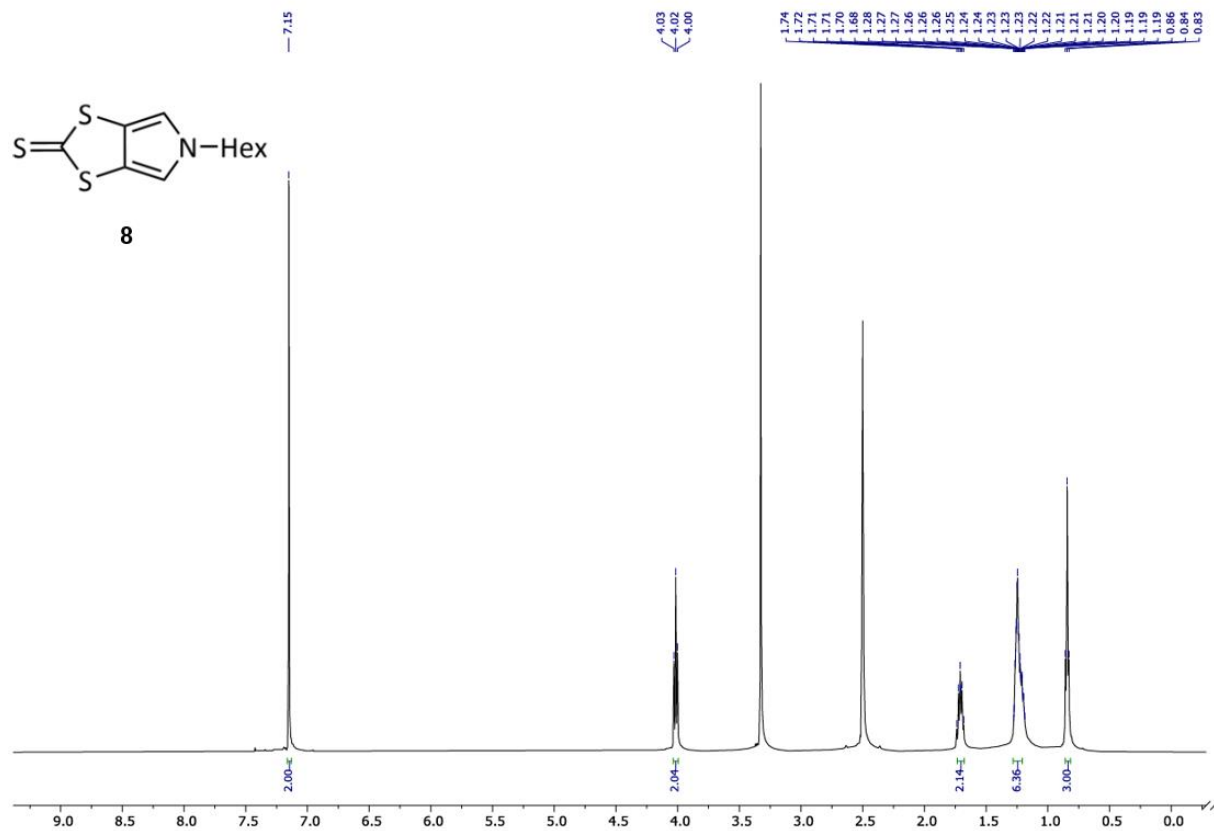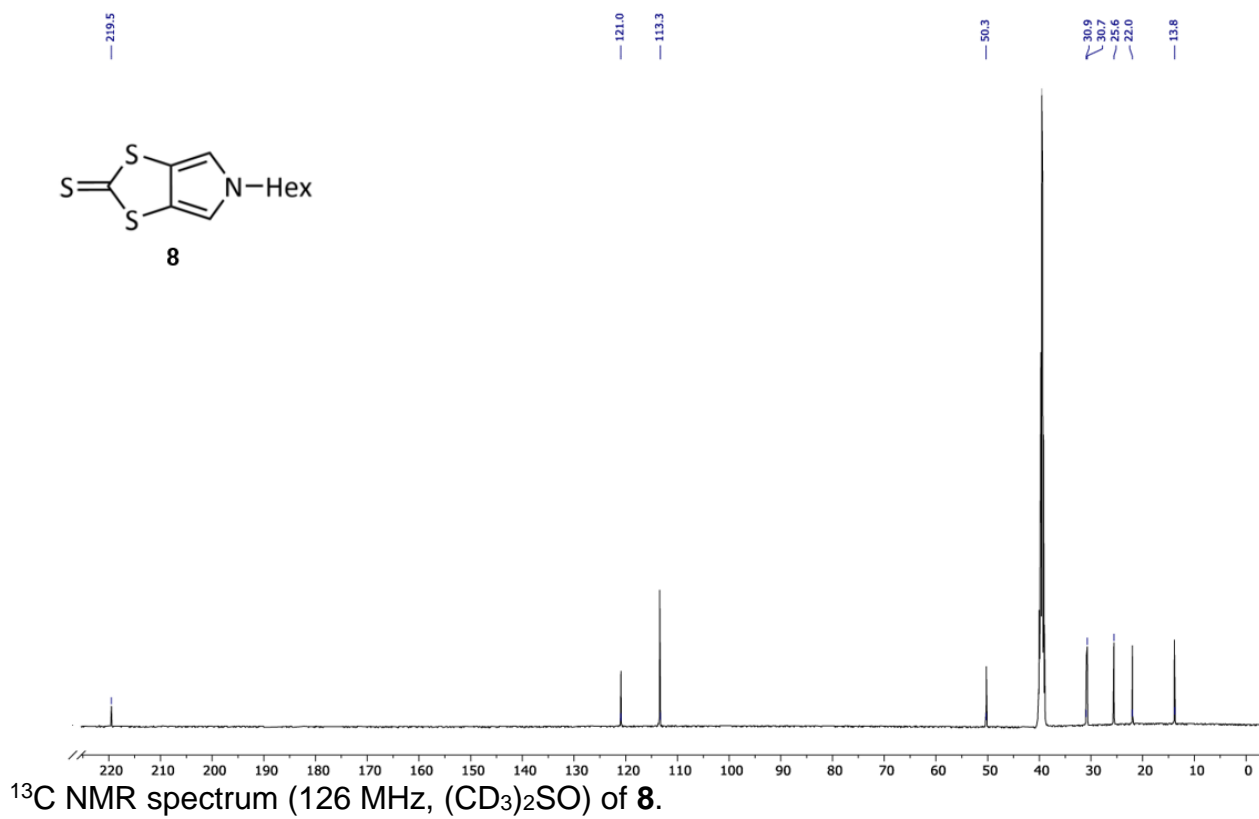

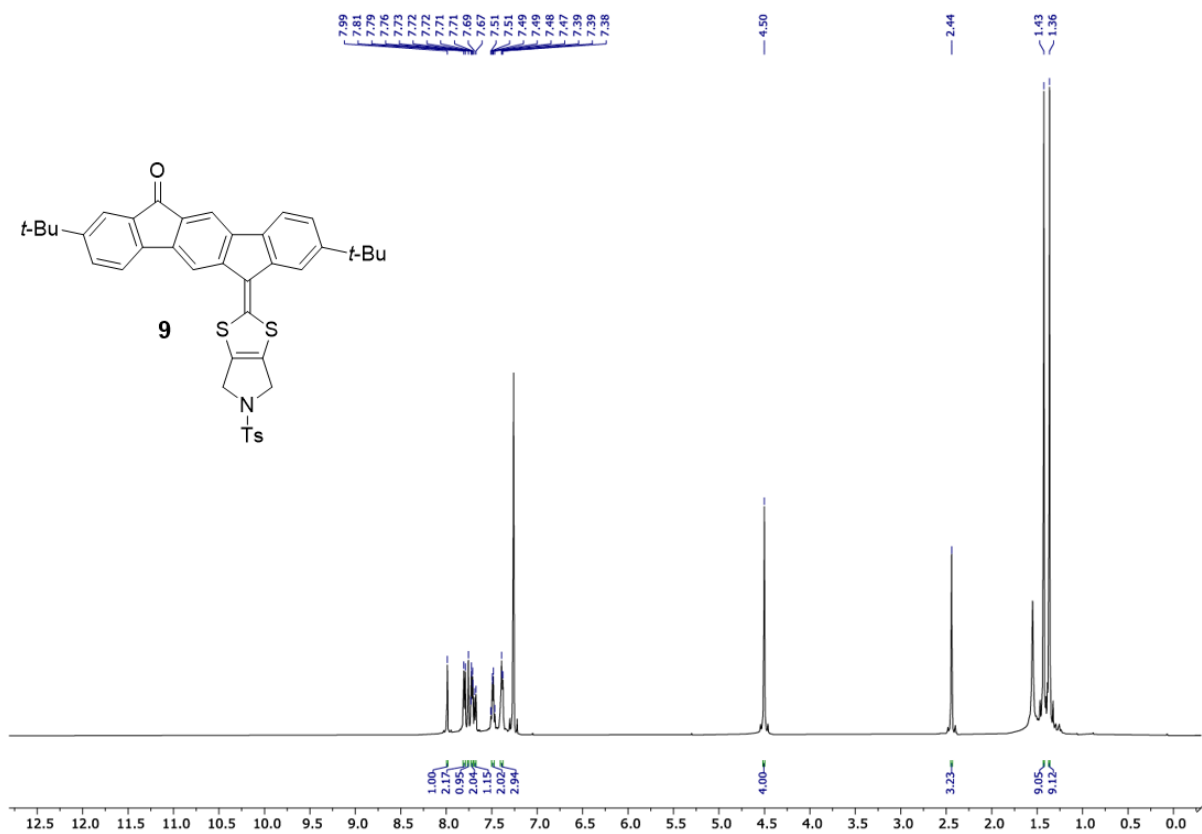

<sup>1</sup>H NMR spectrum (500 MHz, CDCl<sub>3</sub>) of **9**.

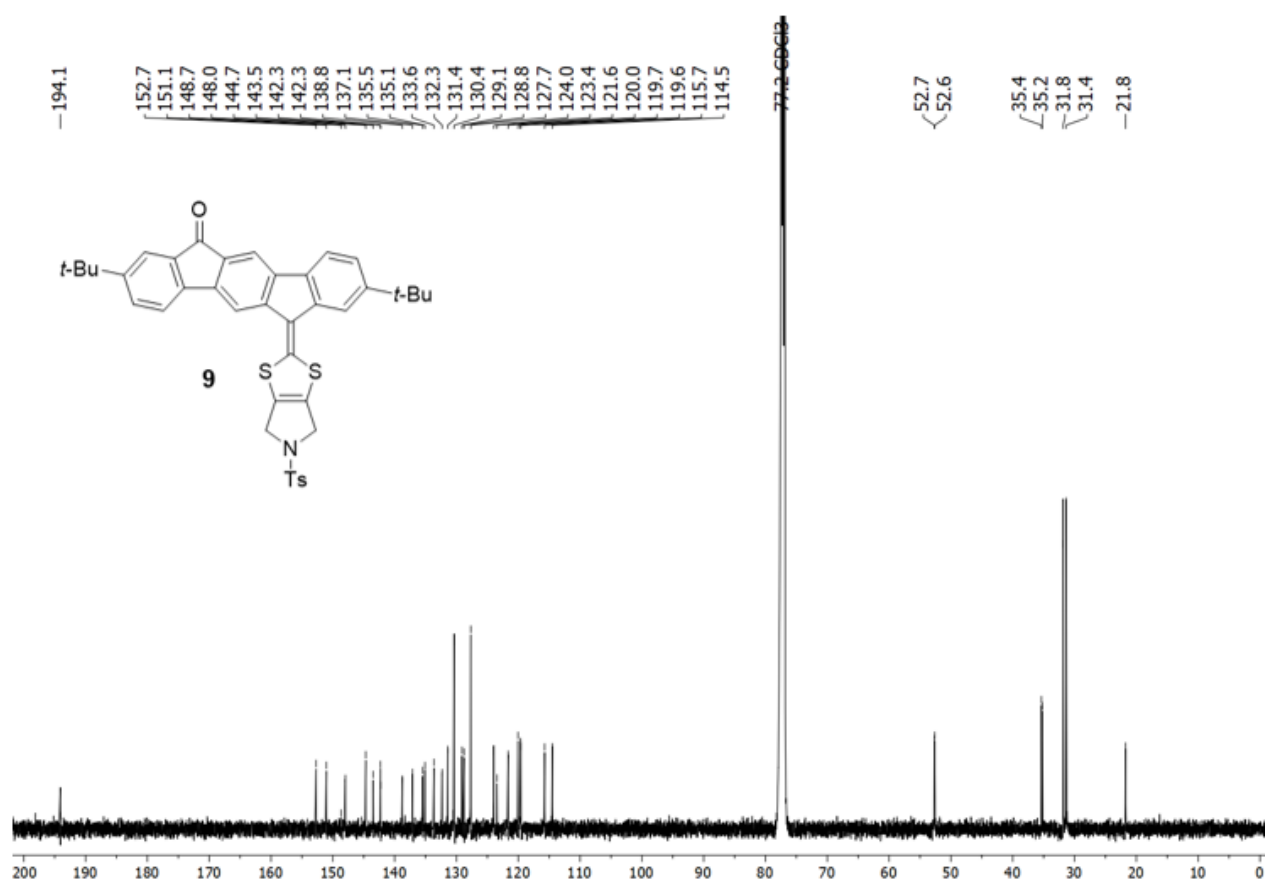

<sup>13</sup>C NMR spectrum (126 MHz, CDCl<sub>3</sub>) of **9**.

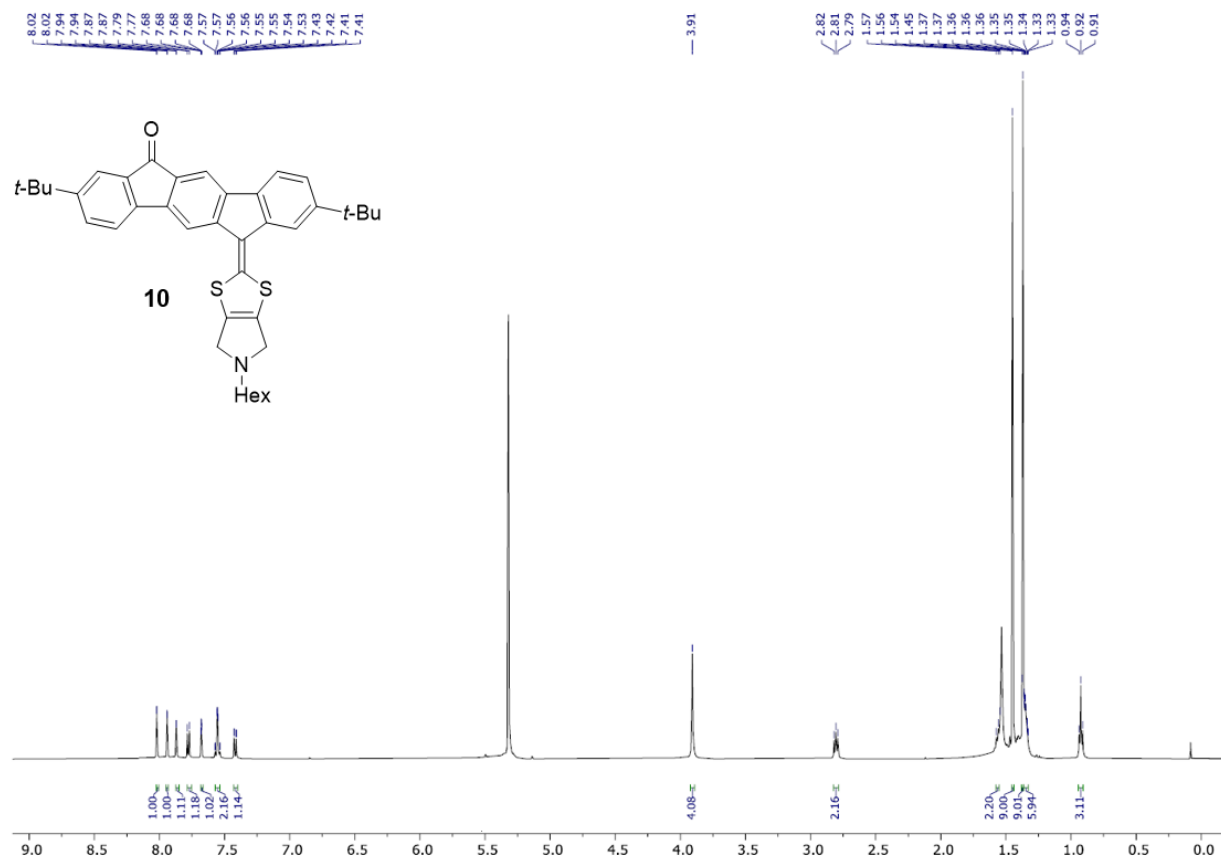

<sup>1</sup>H NMR spectrum (500 MHz, CD<sub>2</sub>Cl<sub>2</sub>) of 10.

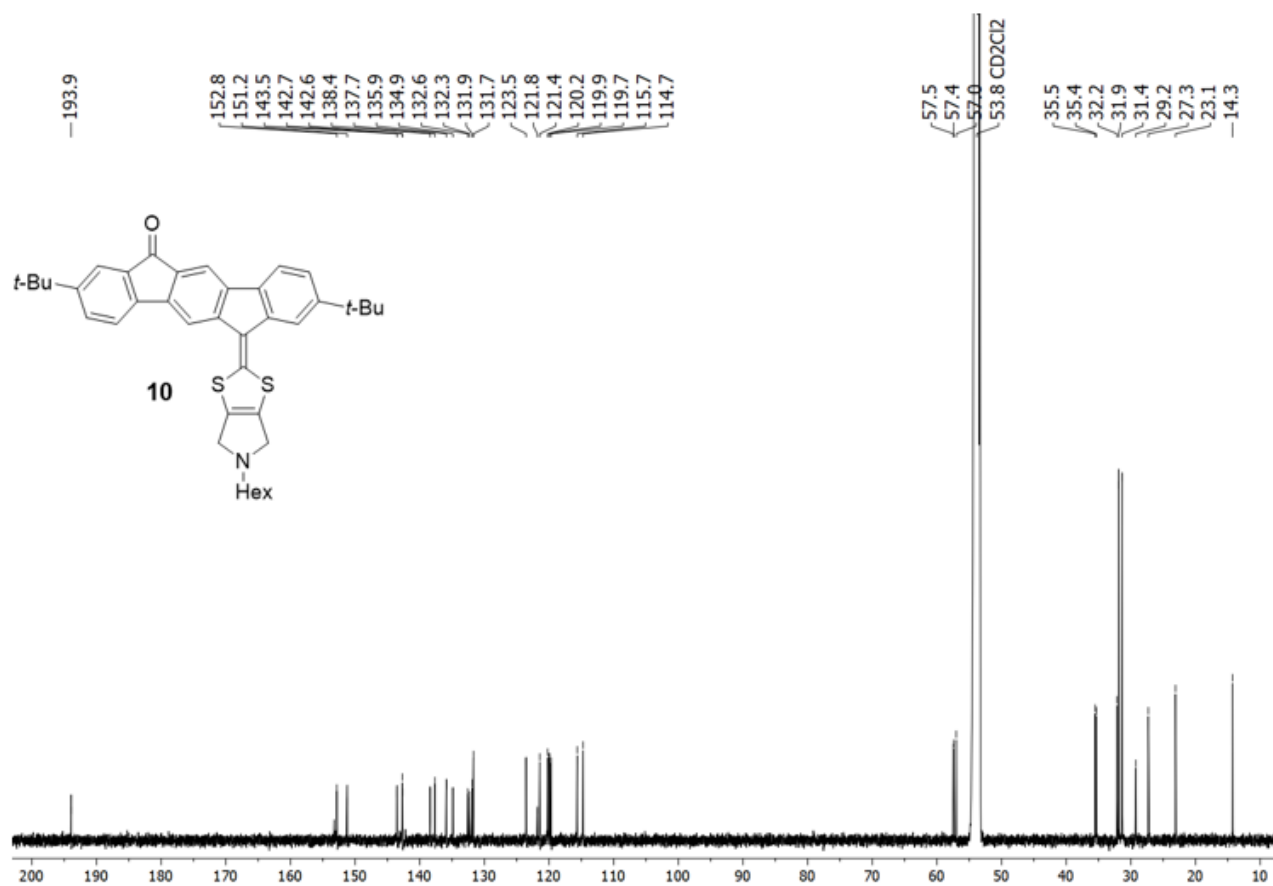

<sup>13</sup>C NMR spectrum (126 MHz, CD<sub>2</sub>Cl<sub>2</sub>) of 10.

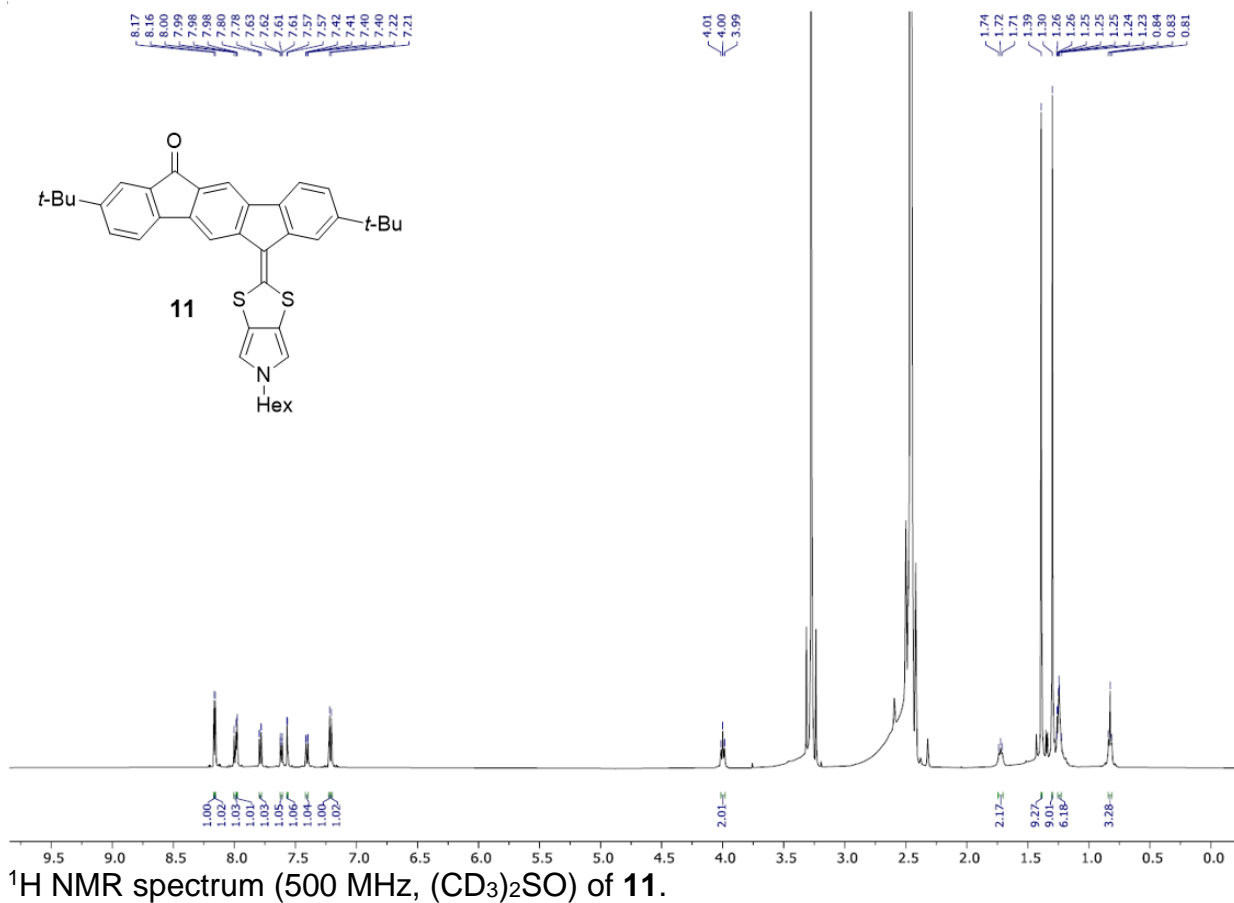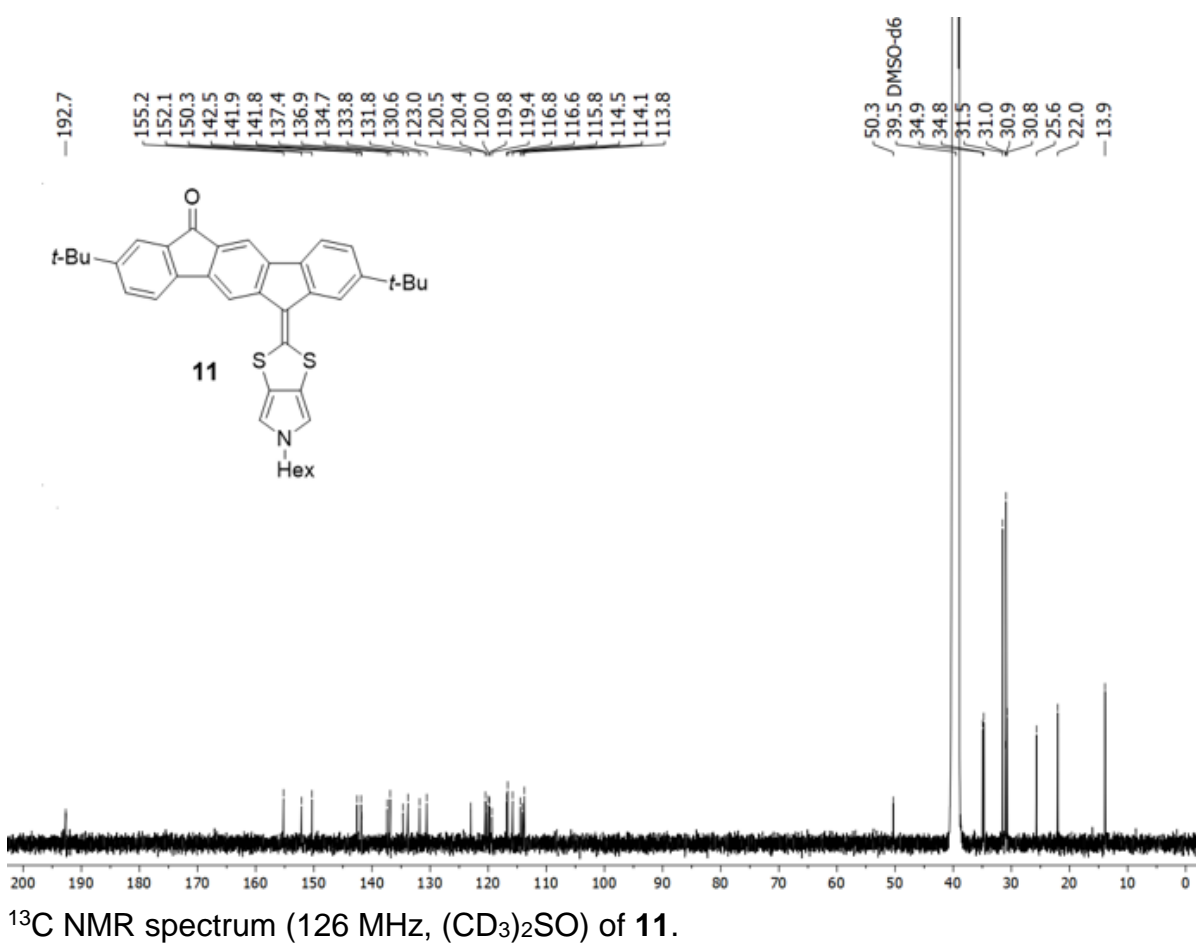

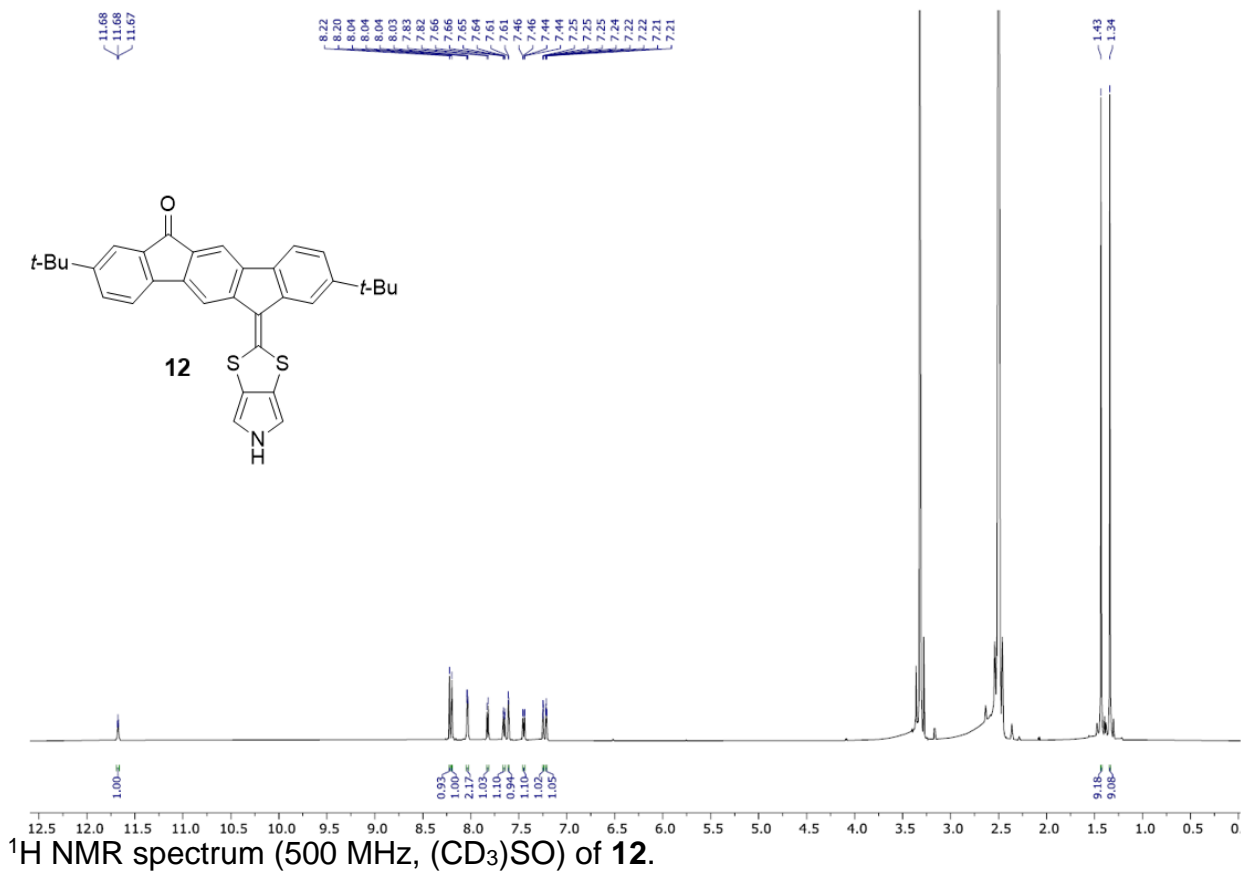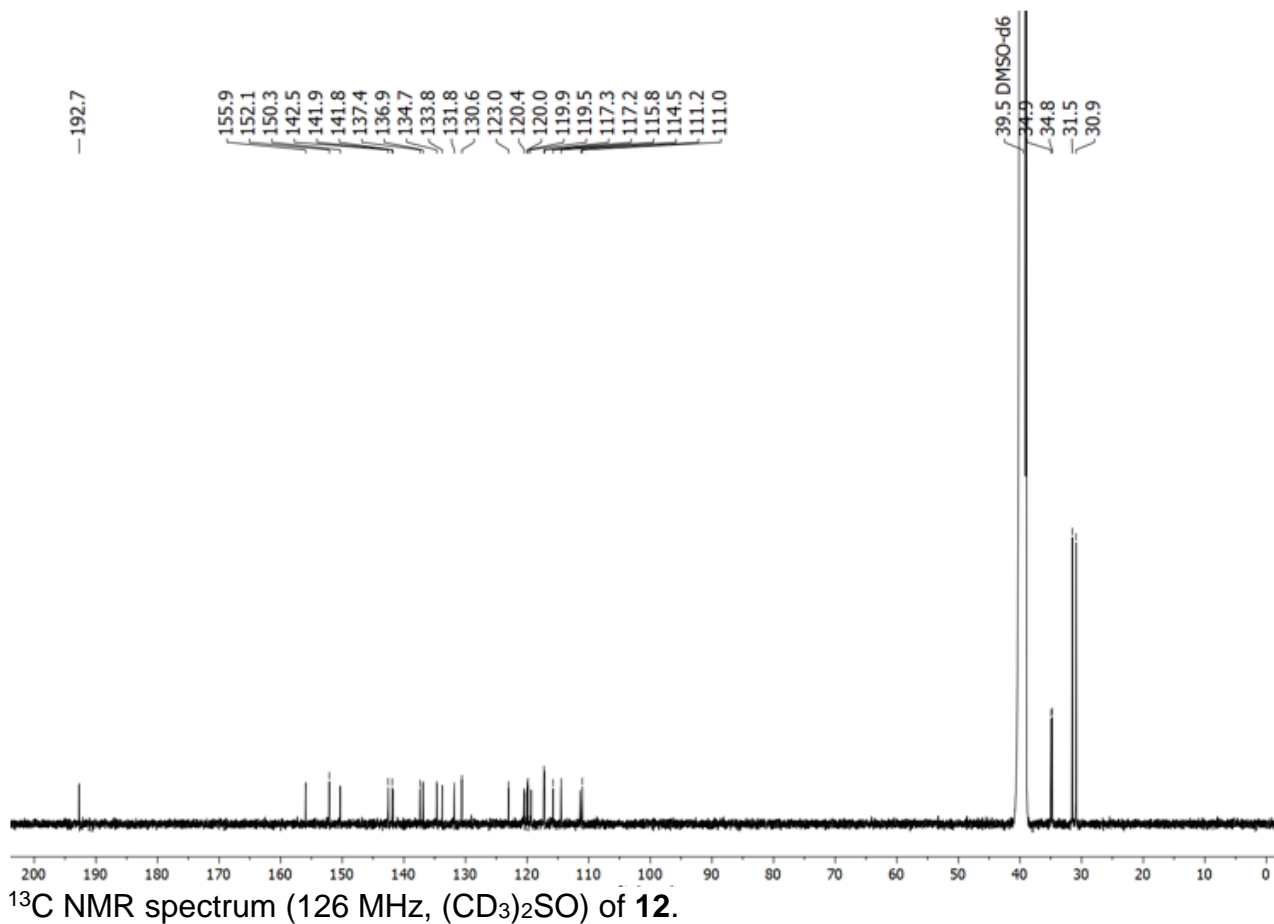



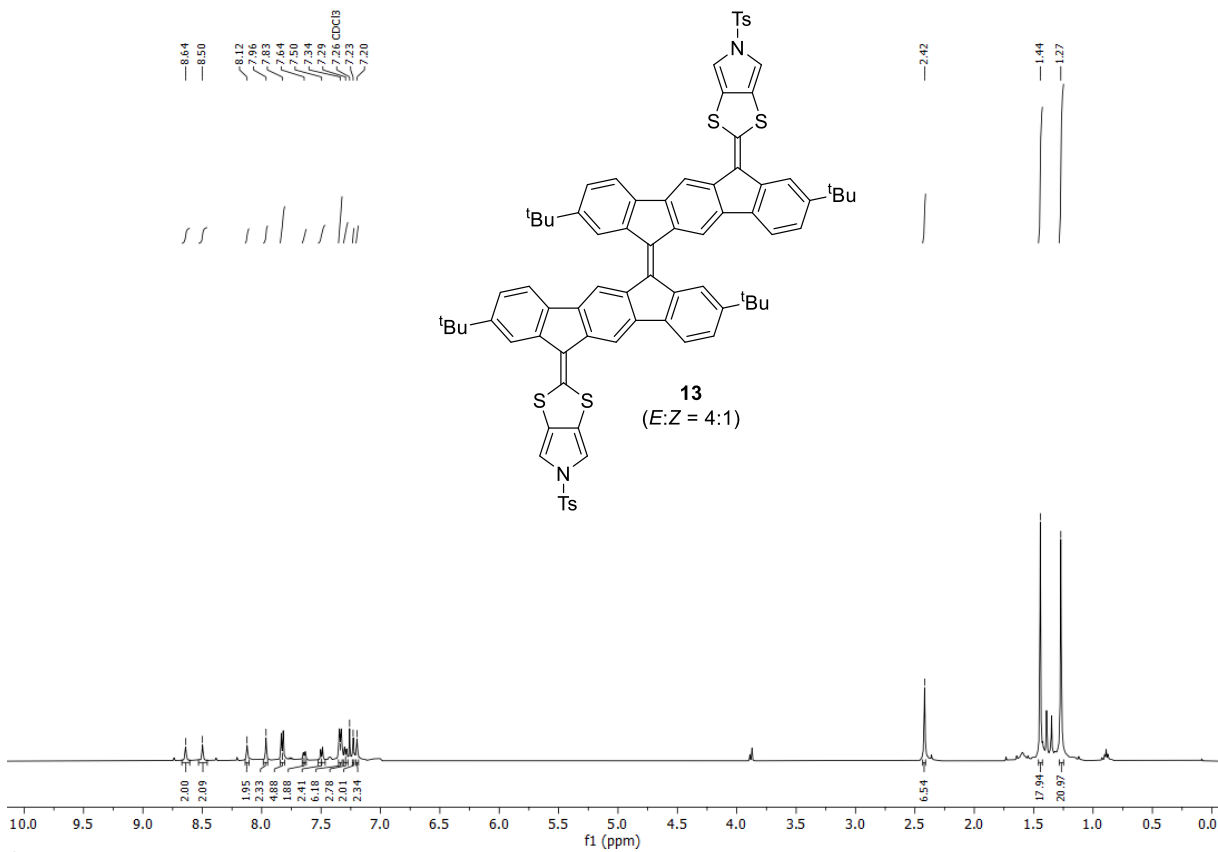

<sup>1</sup>H NMR spectrum (500 MHz, CDCl<sub>3</sub>) of **13**.

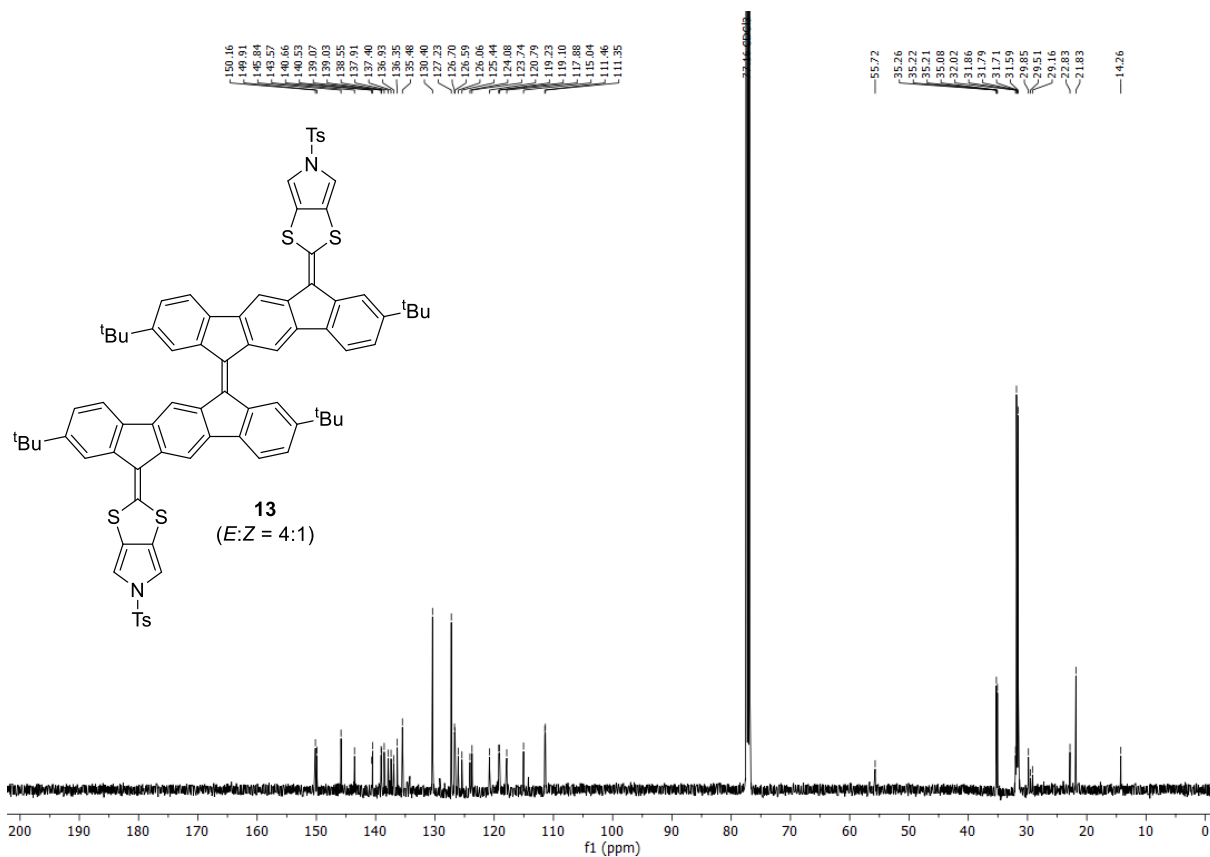

<sup>13</sup>C NMR spectrum (126 MHz, CDCl<sub>3</sub>) of **13**.

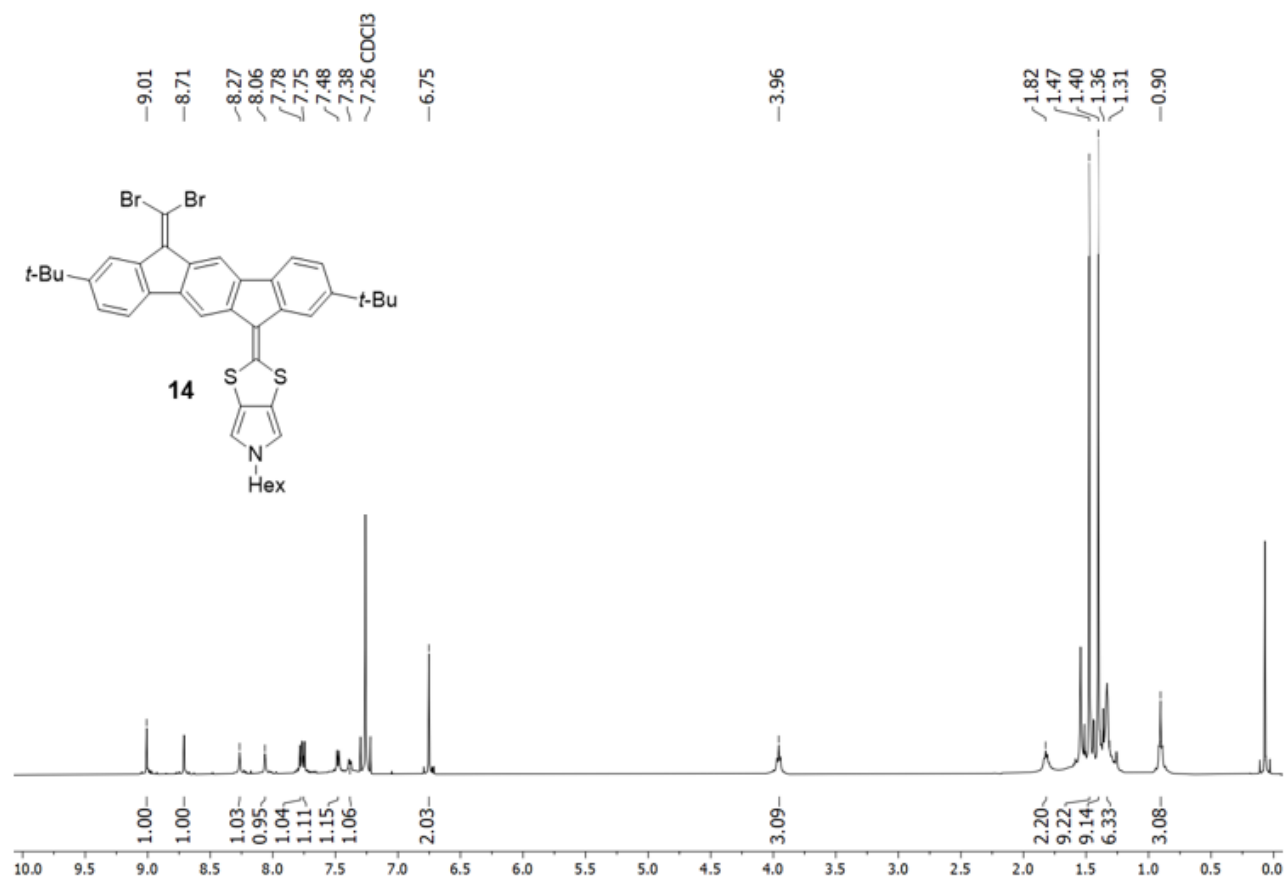

<sup>1</sup>H NMR spectrum (500 MHz, CDCl<sub>3</sub>) of 14.

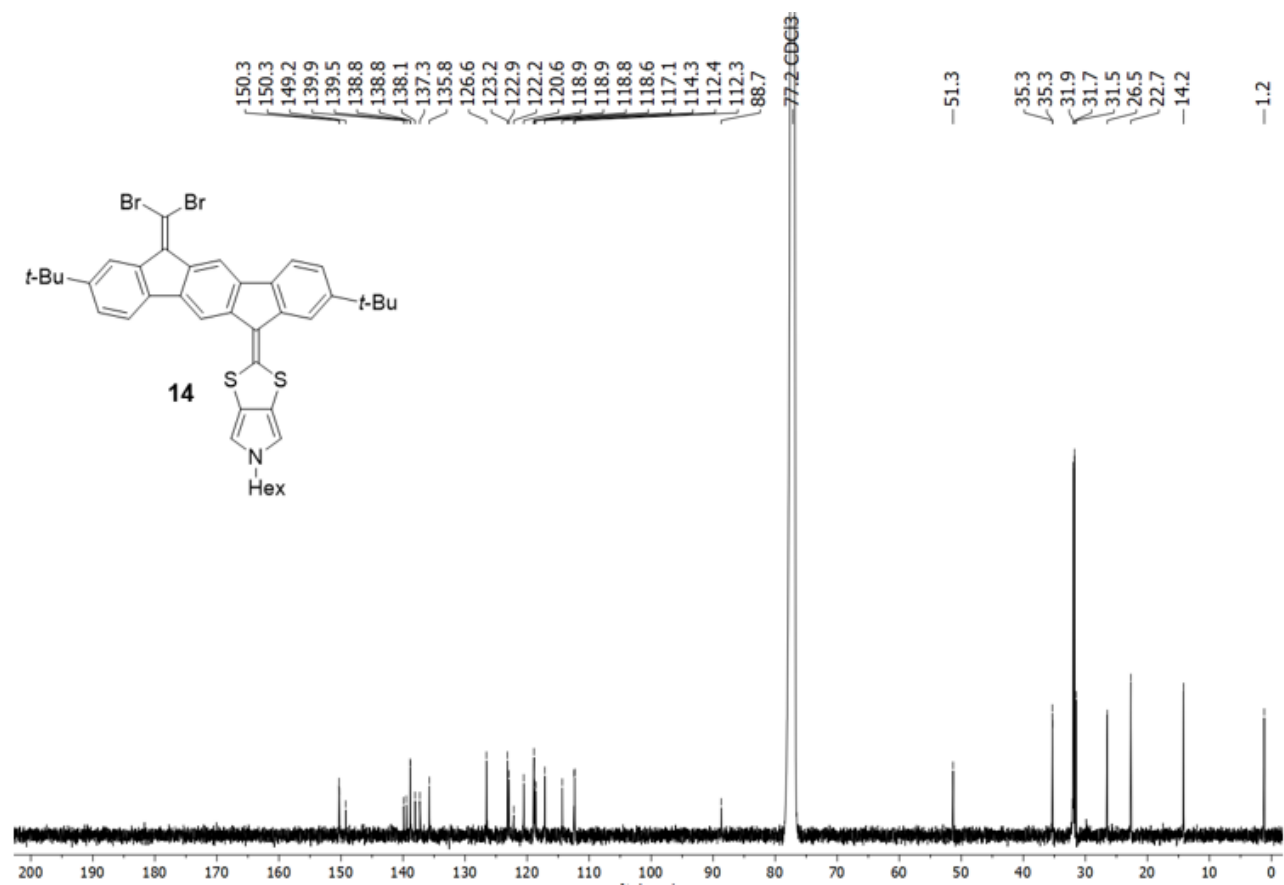

<sup>13</sup>C NMR spectrum (126 MHz, CDCl<sub>3</sub>) of 14.

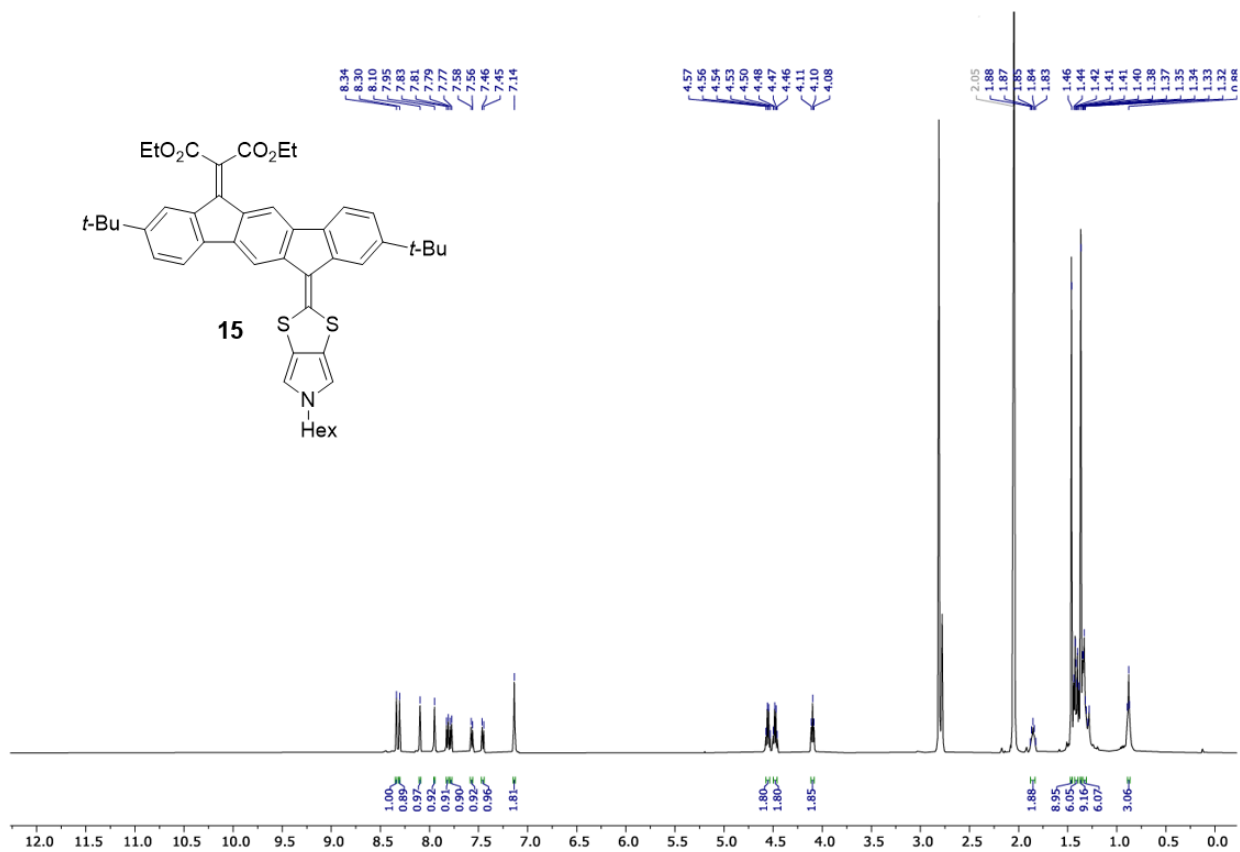

**<sup>1</sup>H NMR spectrum (500 MHz, (CD<sub>3</sub>)<sub>2</sub>CO) of **15**.**

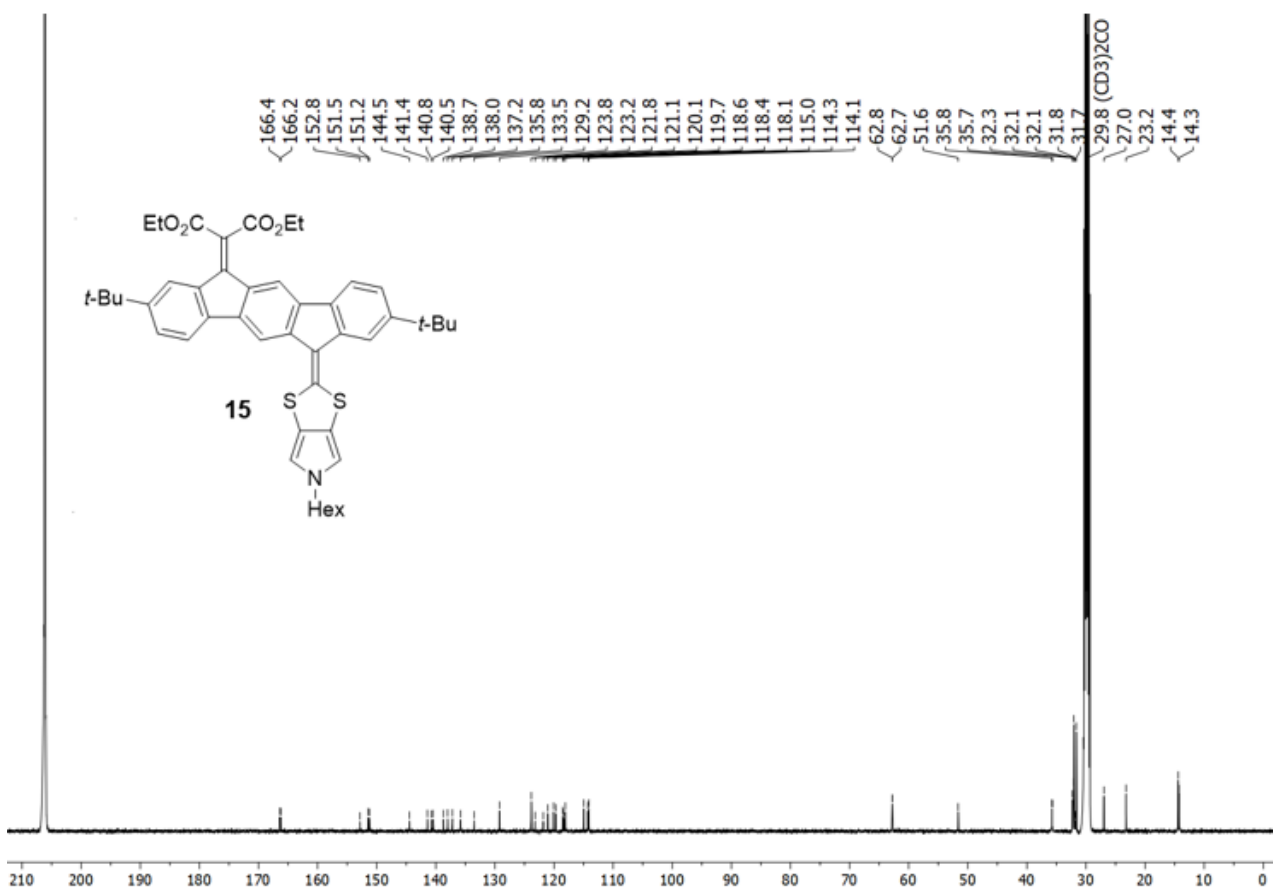

**<sup>13</sup>C NMR spectrum (126 MHz, (CD<sub>3</sub>)<sub>2</sub>CO) of **15**.**

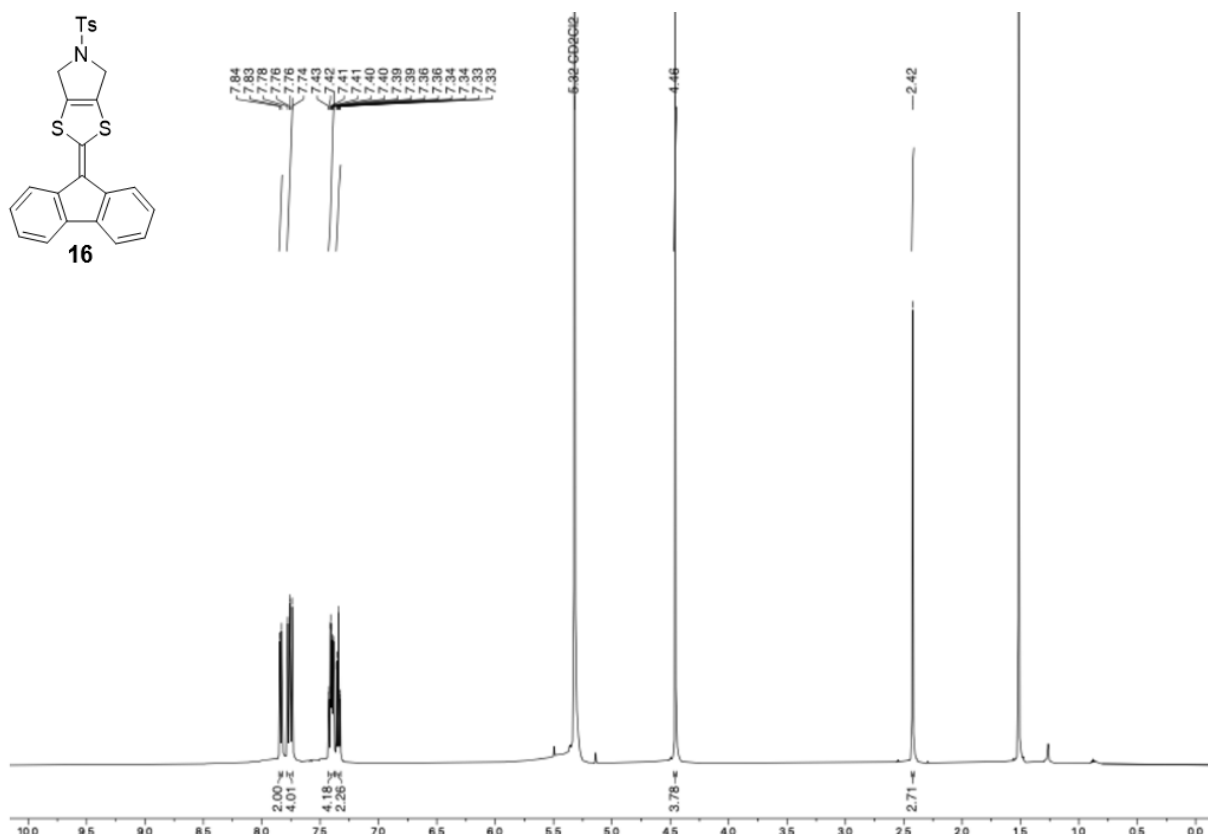

<sup>1</sup>H NMR spectrum (500 MHz, CD<sub>2</sub>Cl<sub>2</sub>) of **16**.

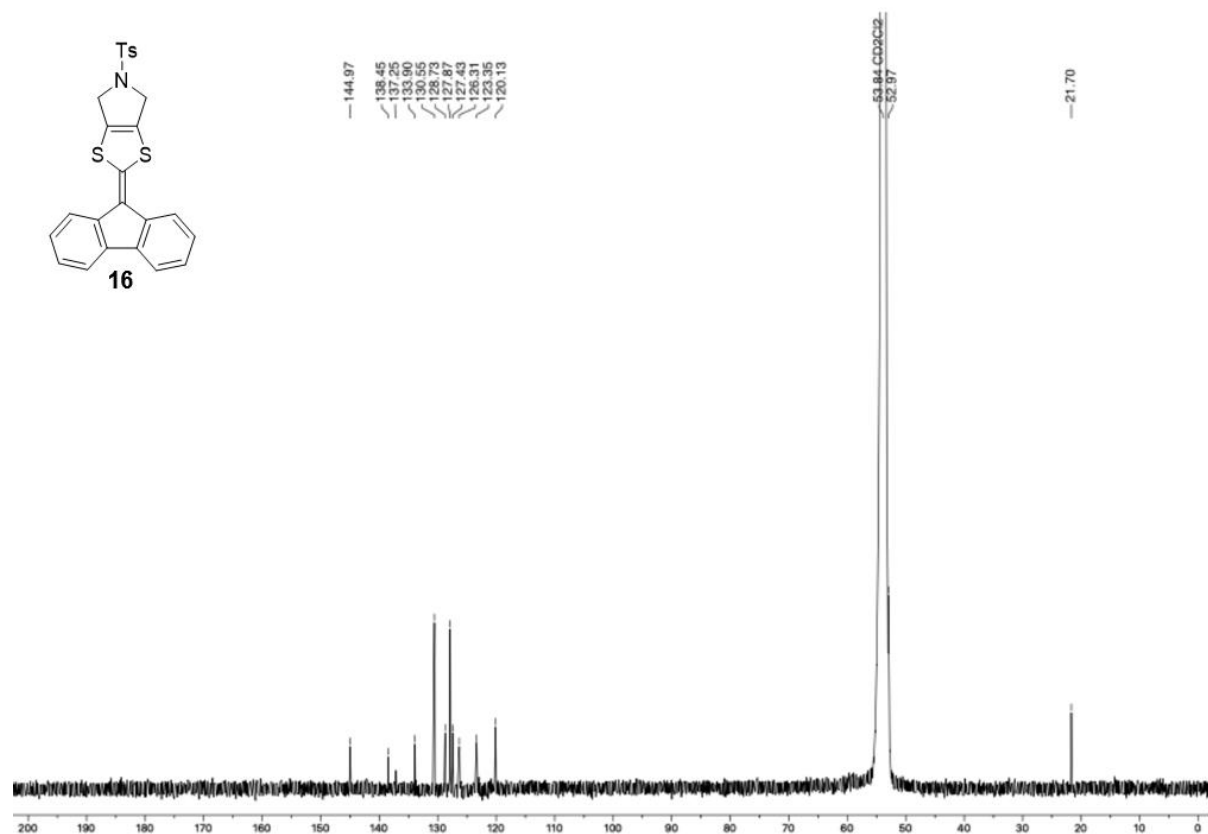

<sup>13</sup>C NMR spectrum (126 MHz, CD<sub>2</sub>Cl<sub>2</sub>) of **16**.

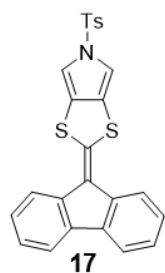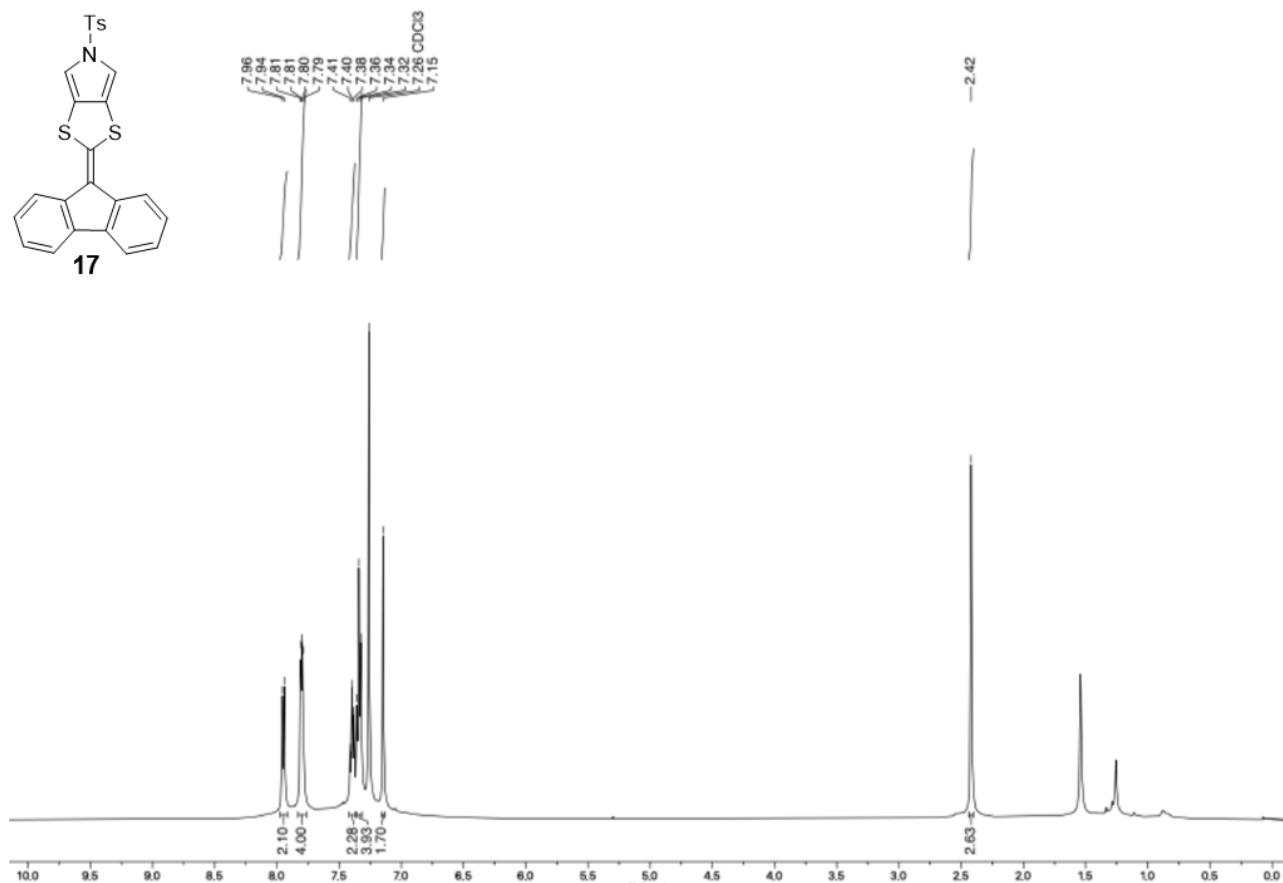

$^1\text{H}$  NMR spectrum (500 MHz,  $\text{CDCl}_3$ ) of **17**.

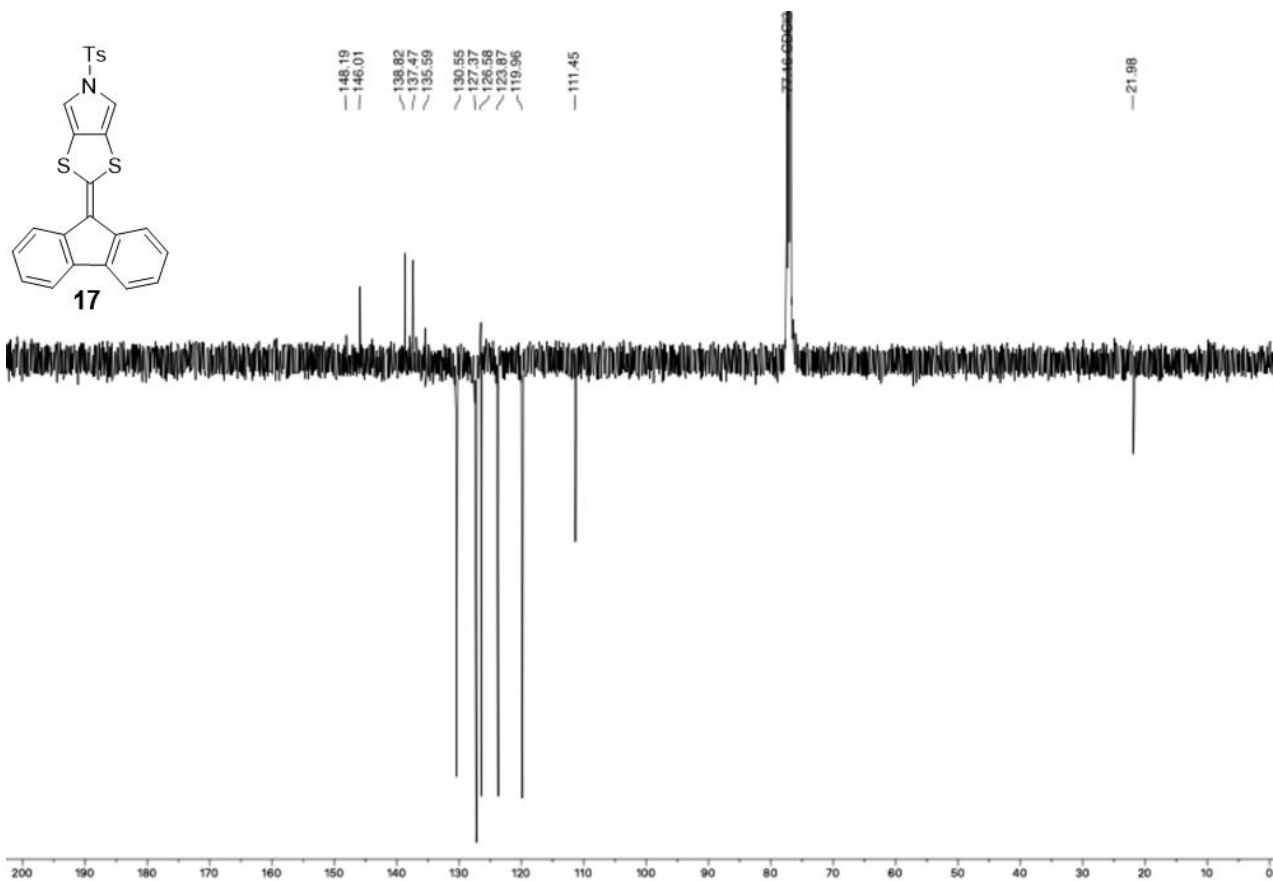

$^{13}\text{C}$  NMR spectrum (126 MHz,  $\text{CDCl}_3$ ) of **17**.

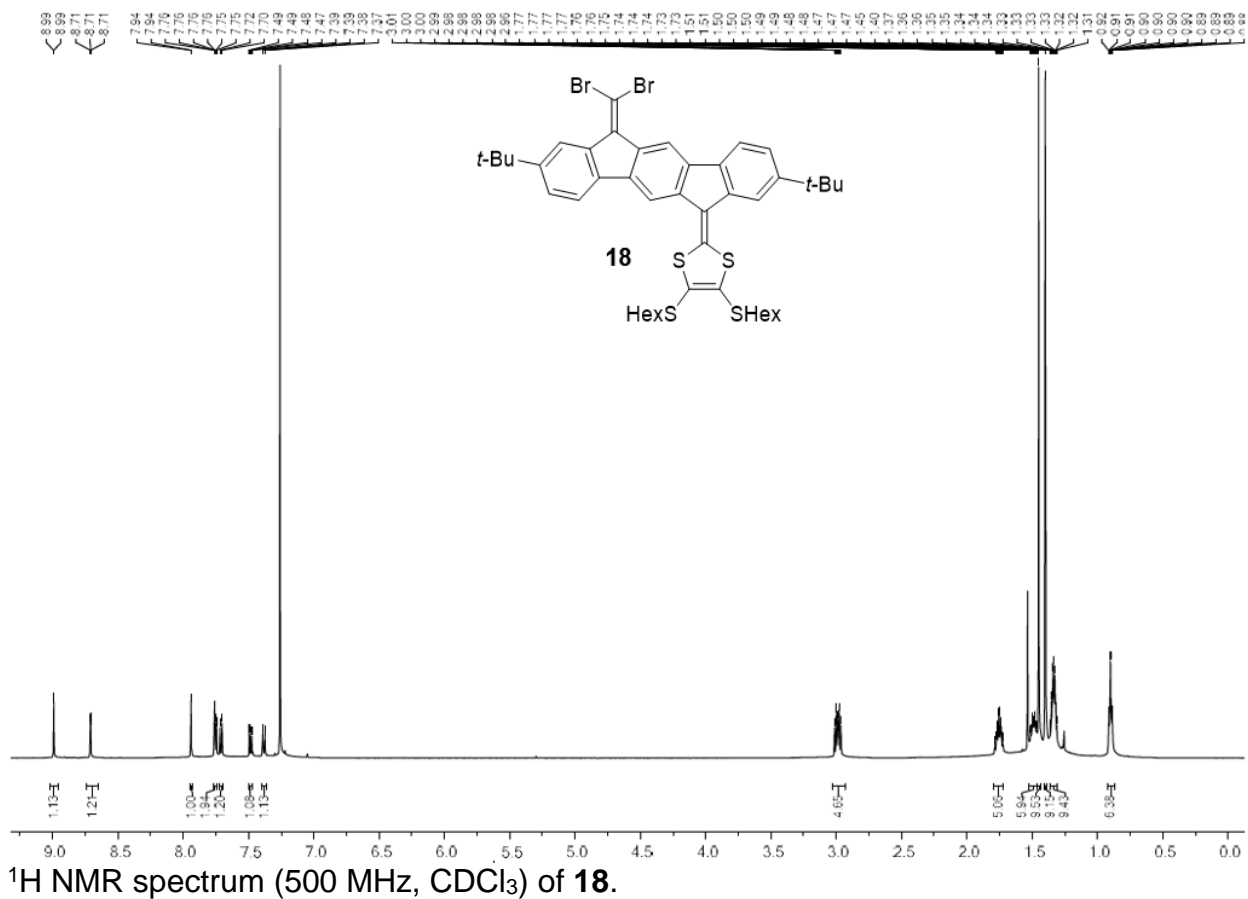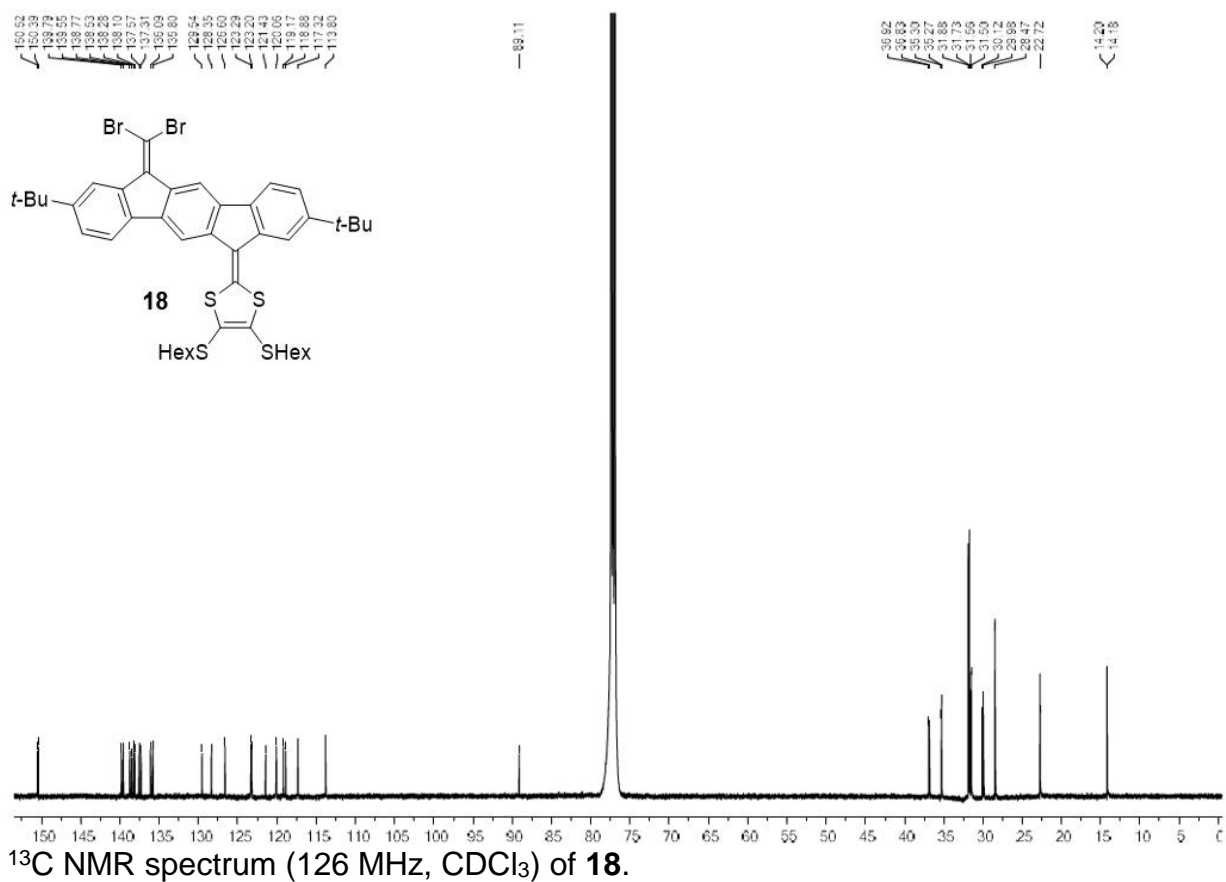



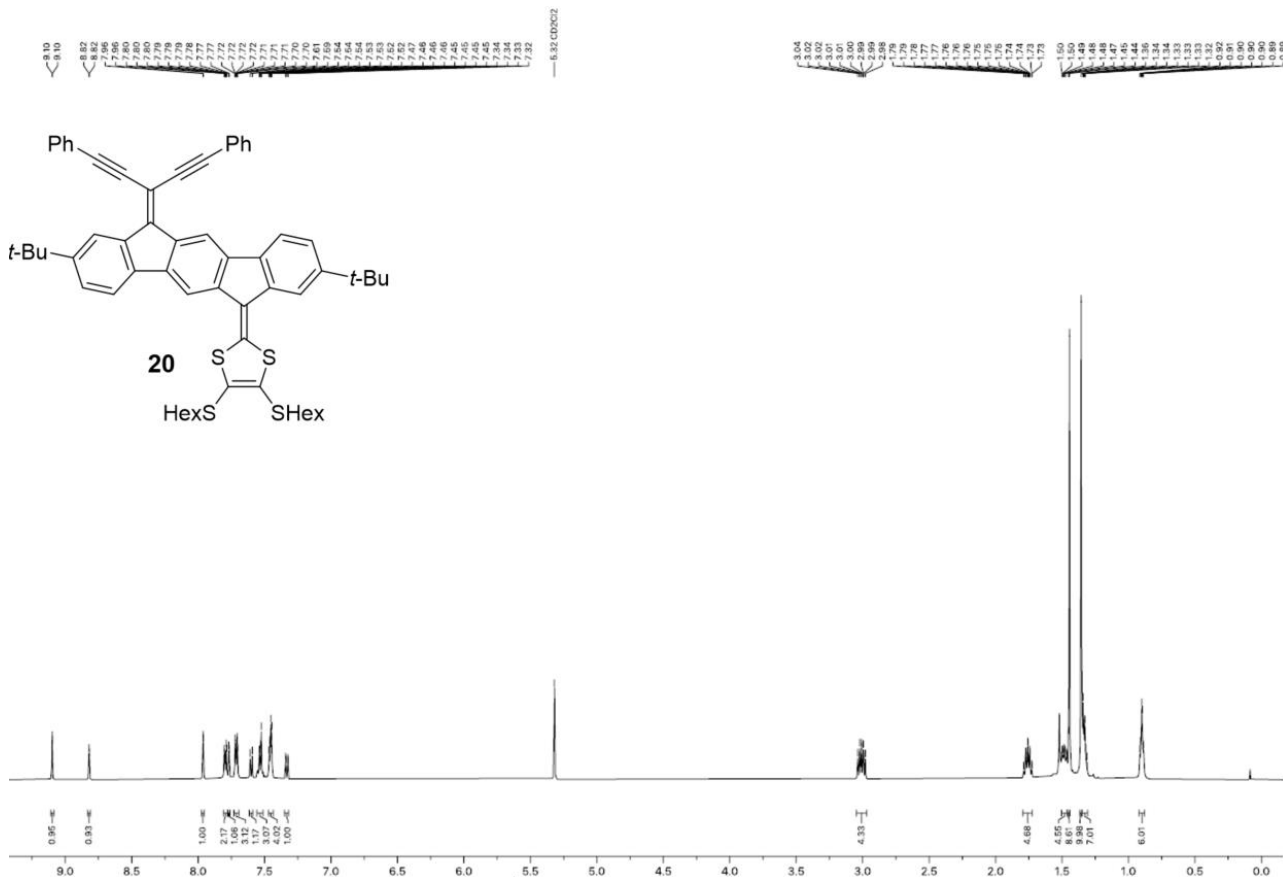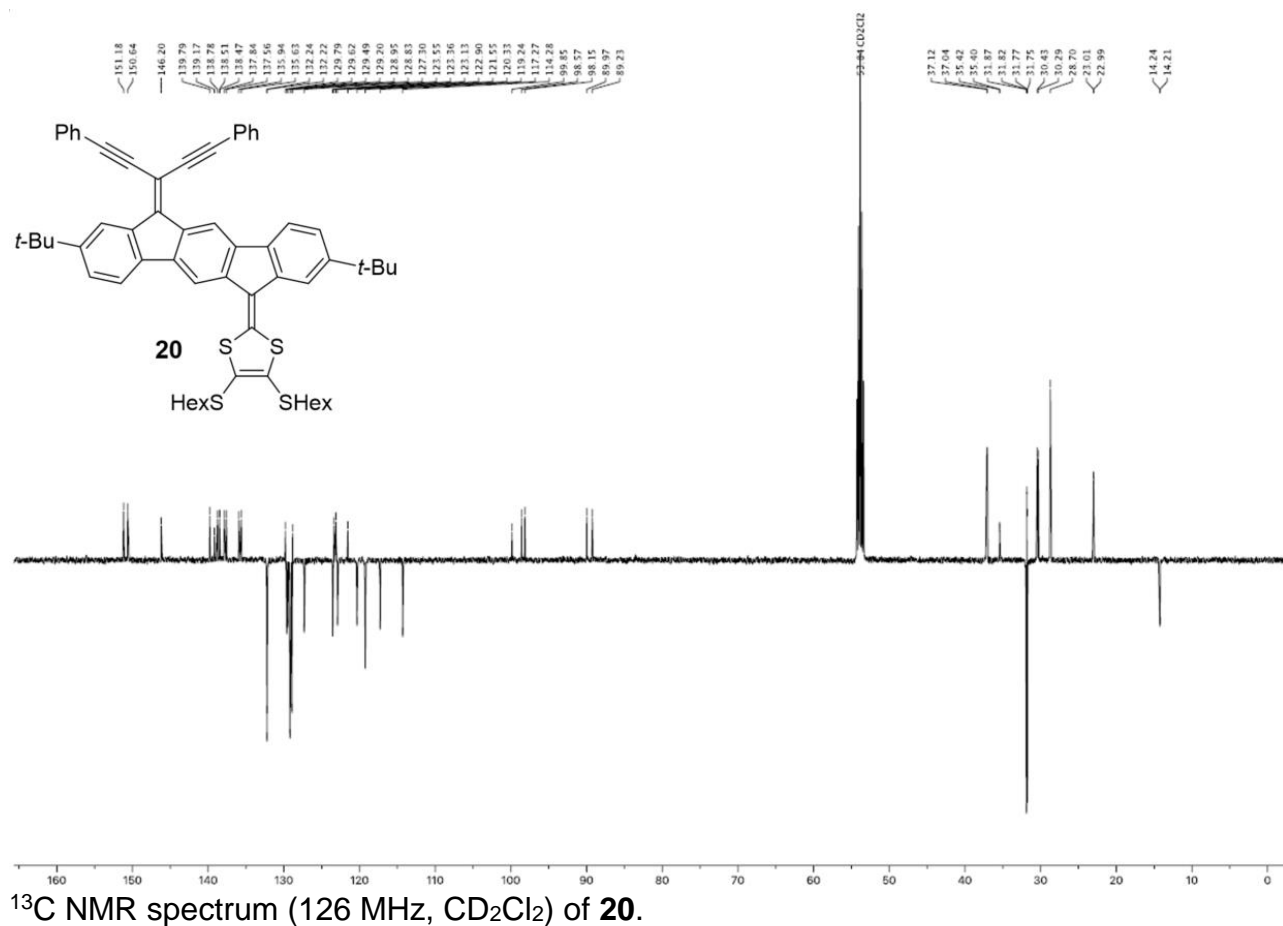



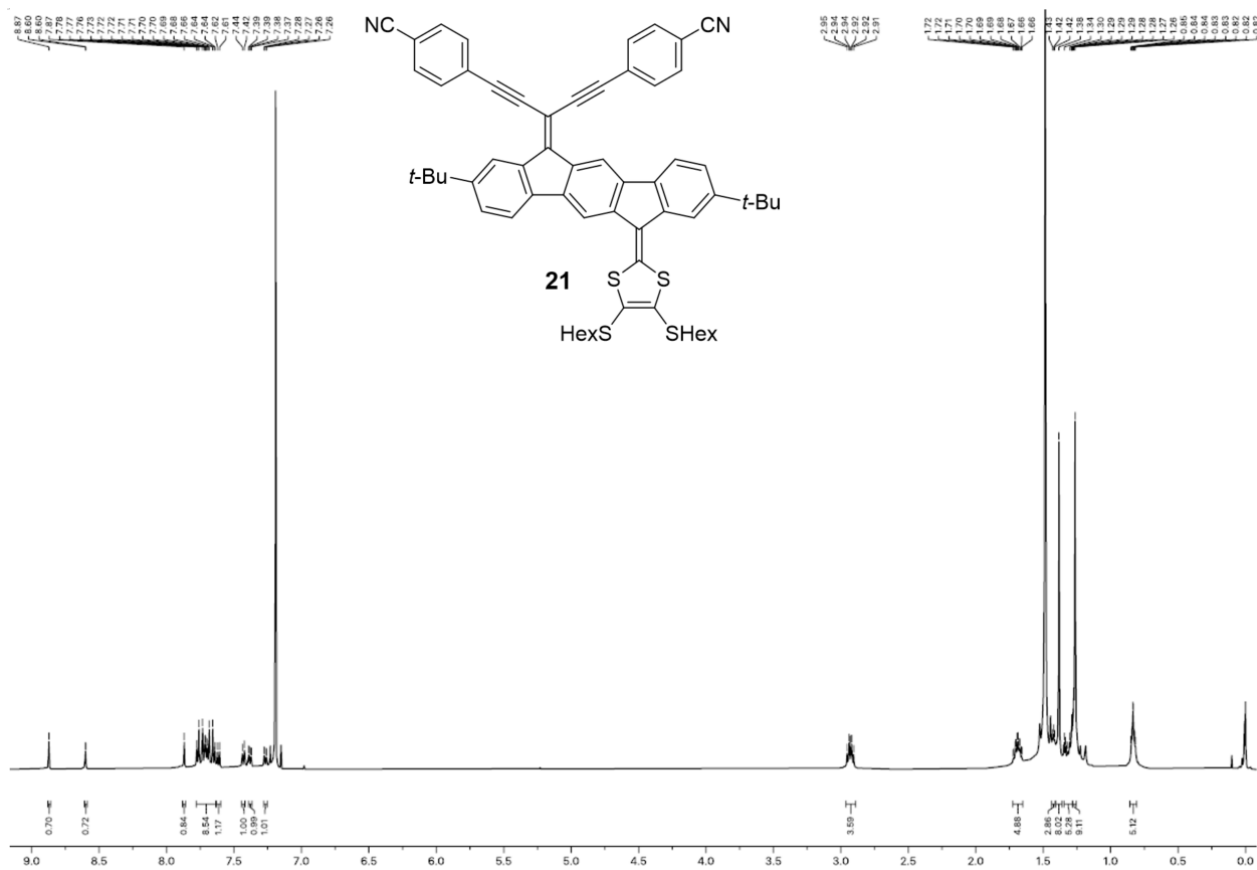

**1H NMR spectrum (500 MHz, CDCl<sub>3</sub>) of 21.**

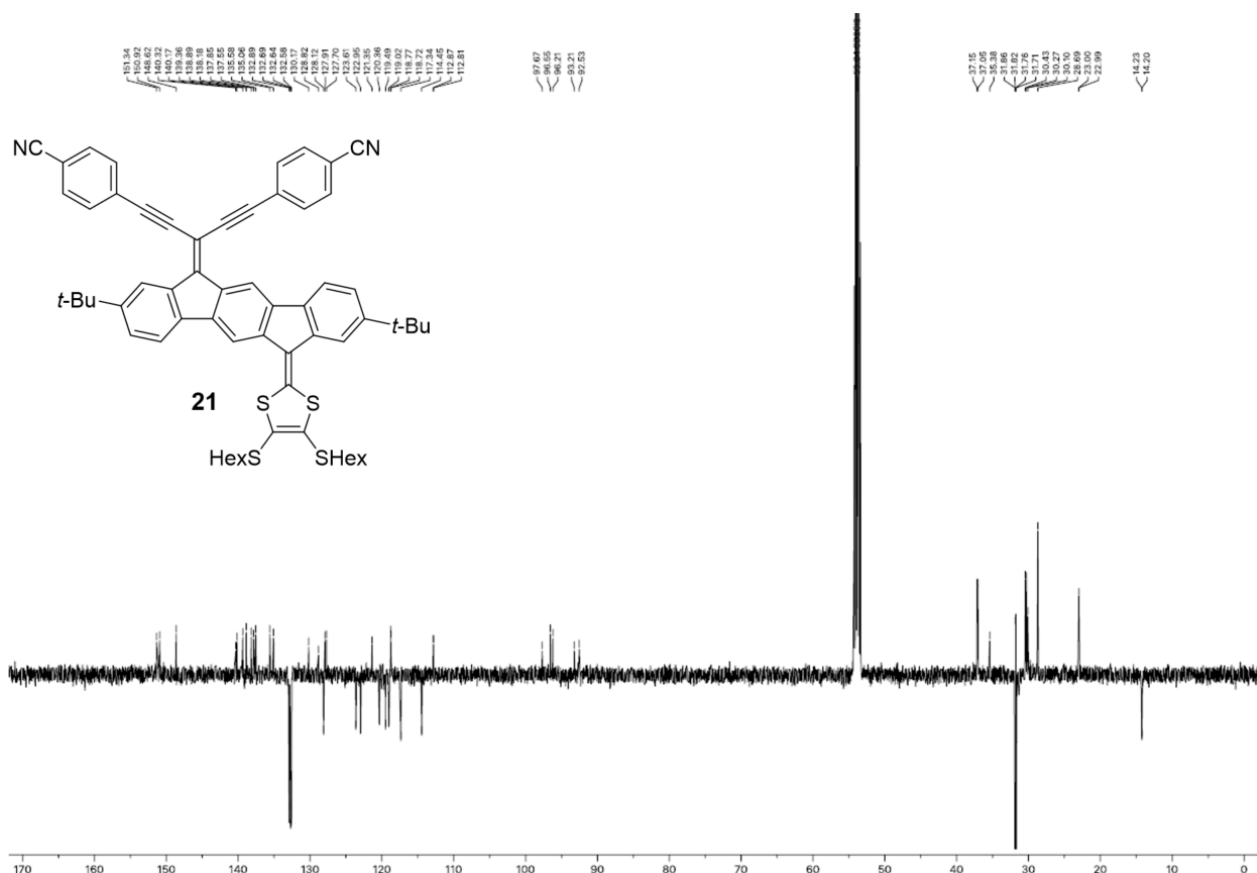

**13C NMR spectrum (126 MHz, CDCl<sub>3</sub>) of 21.**





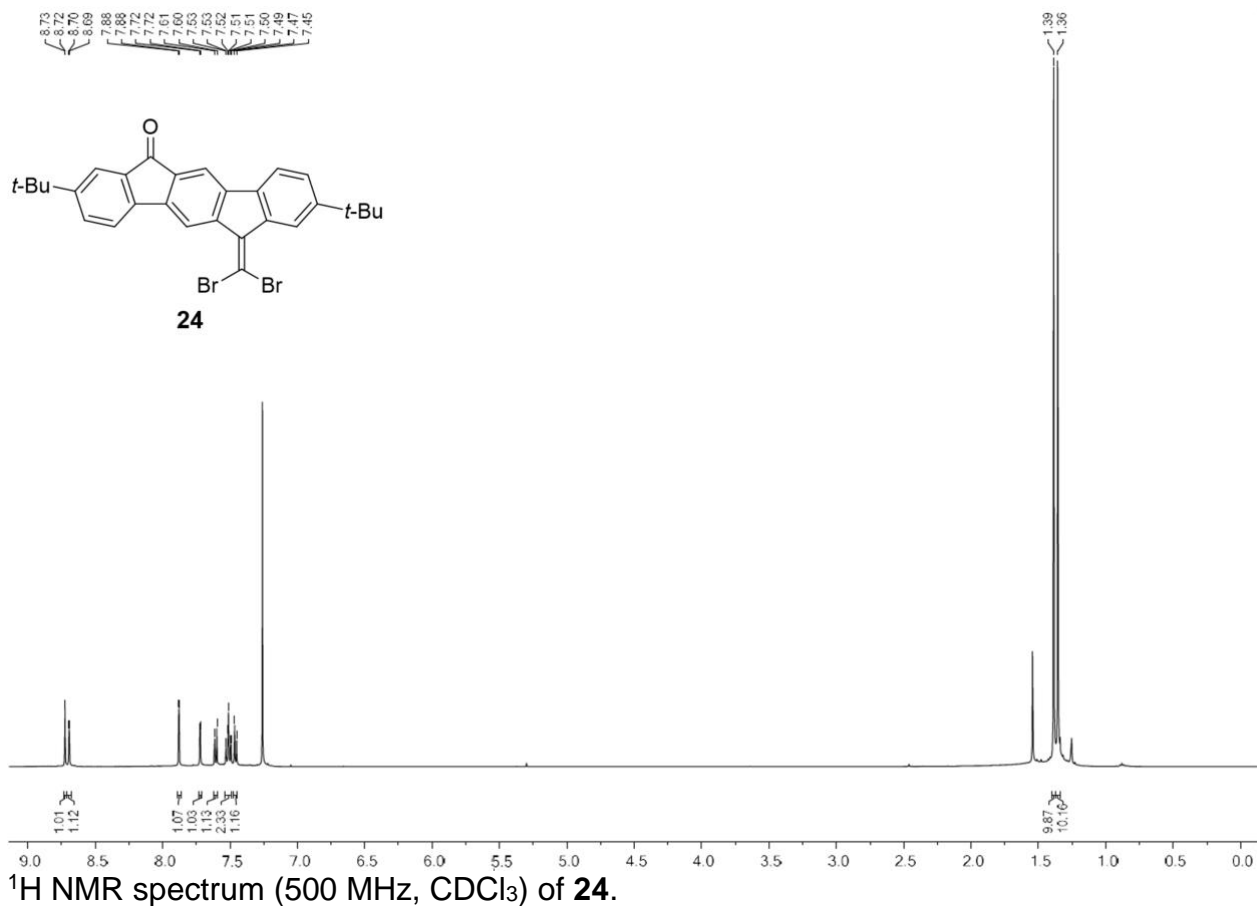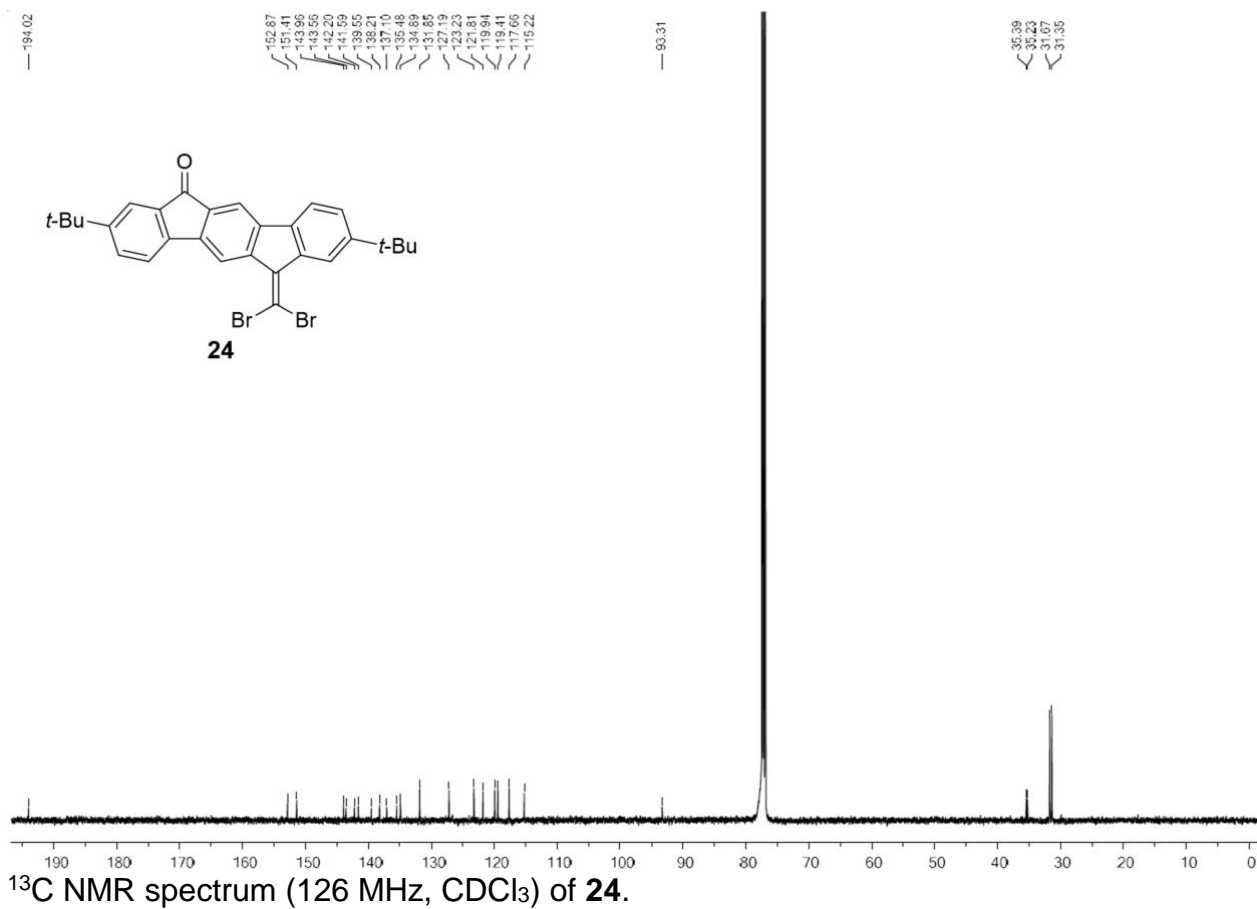

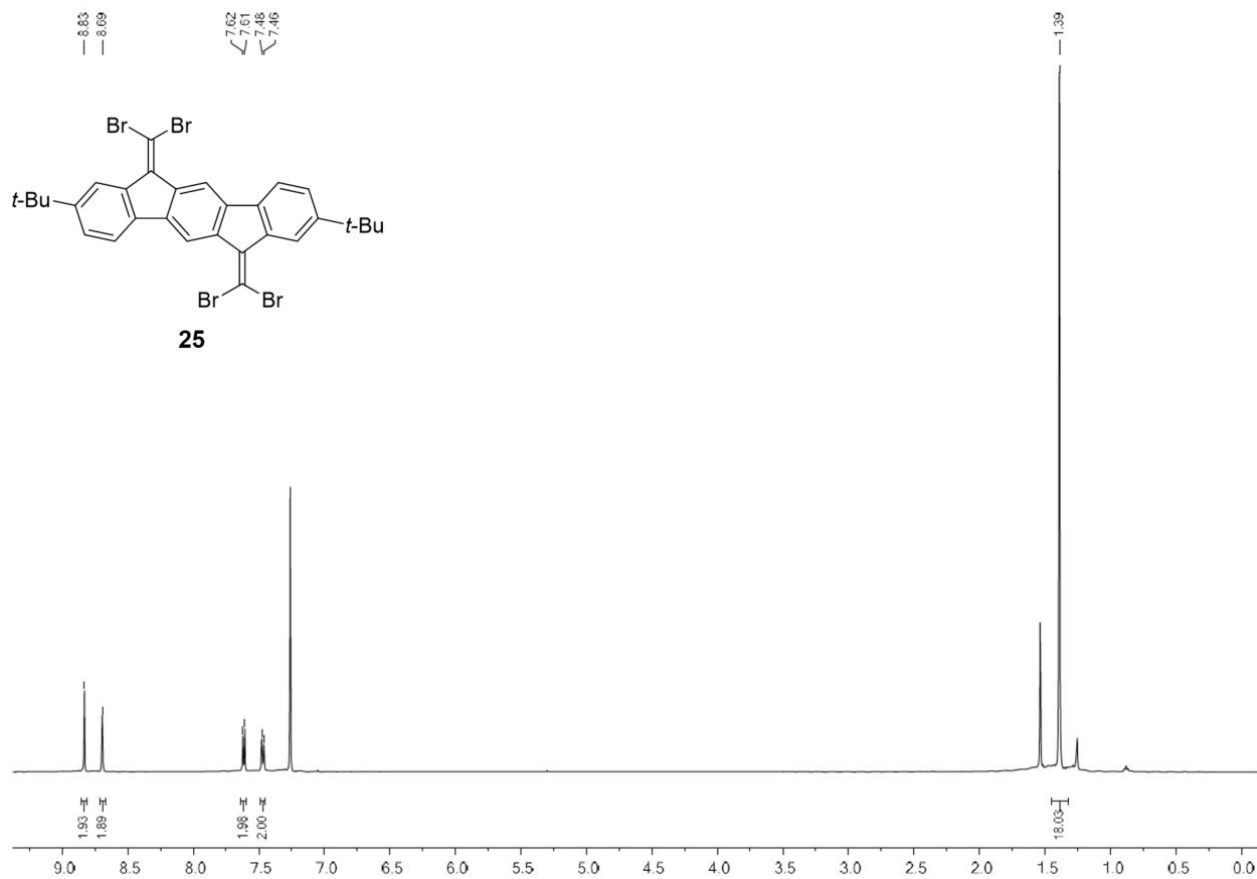

<sup>1</sup>H NMR spectrum (500 MHz, CDCl<sub>3</sub>) of **25**.

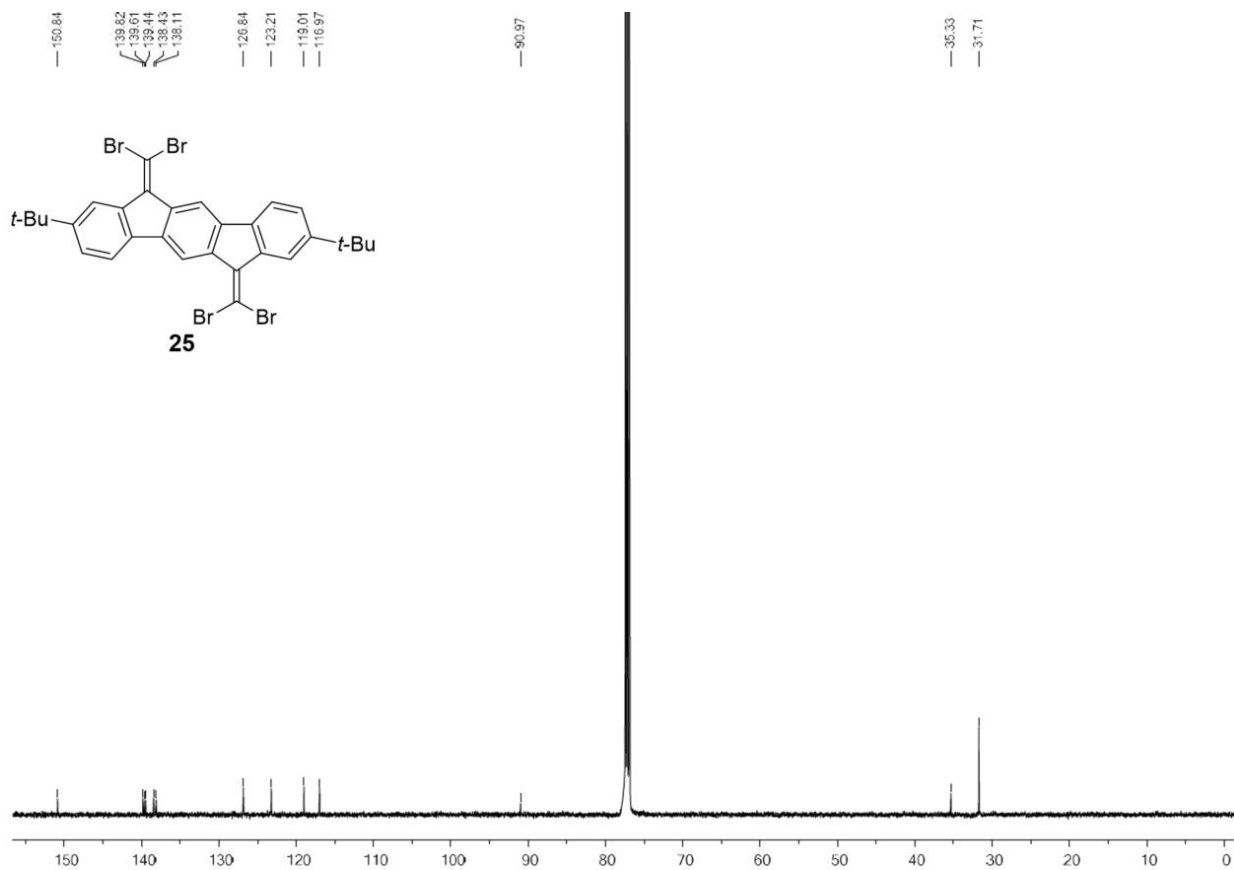

<sup>13</sup>C NMR spectrum (126 MHz, CDCl<sub>3</sub>) of **25**.



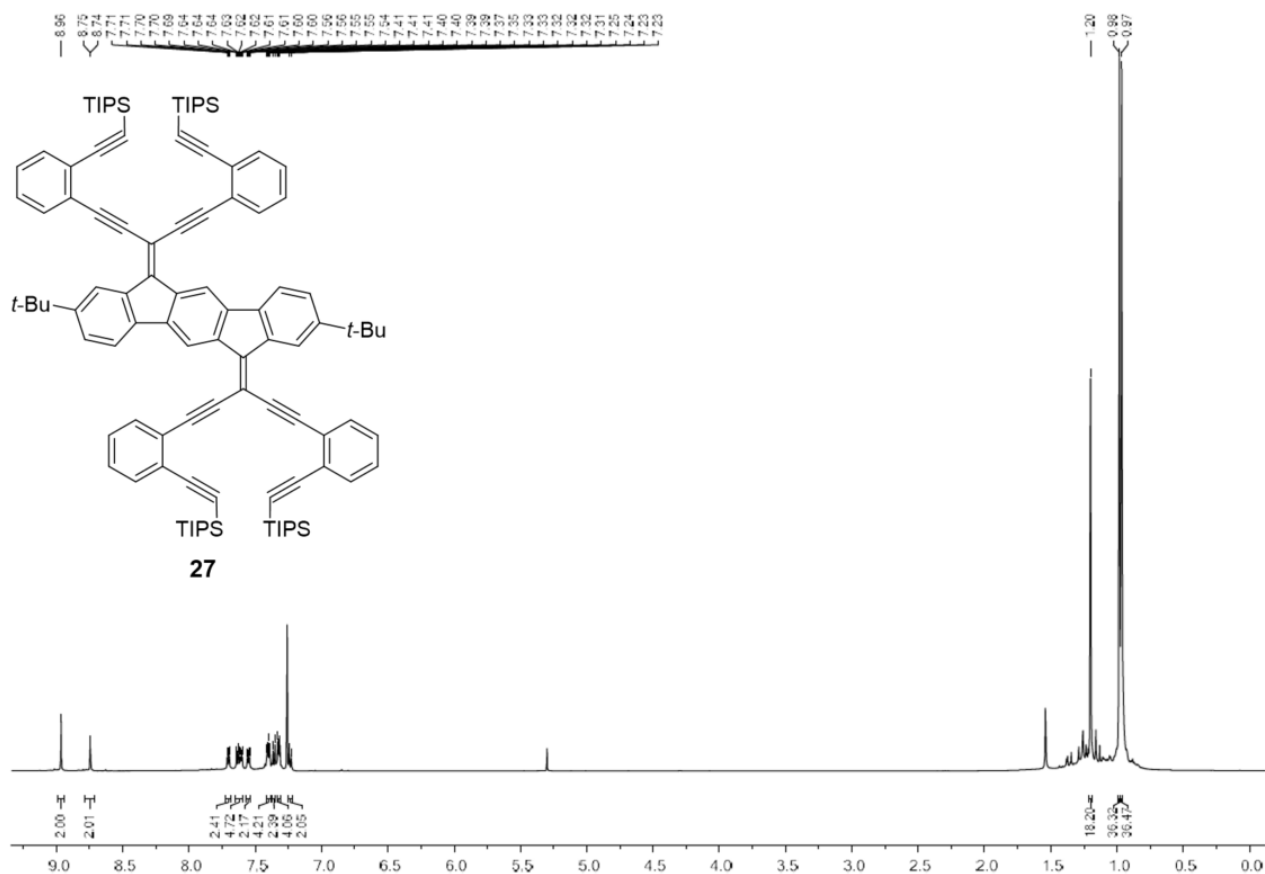

<sup>1</sup>H NMR spectrum (500 MHz, CDCl<sub>3</sub>) of 27.

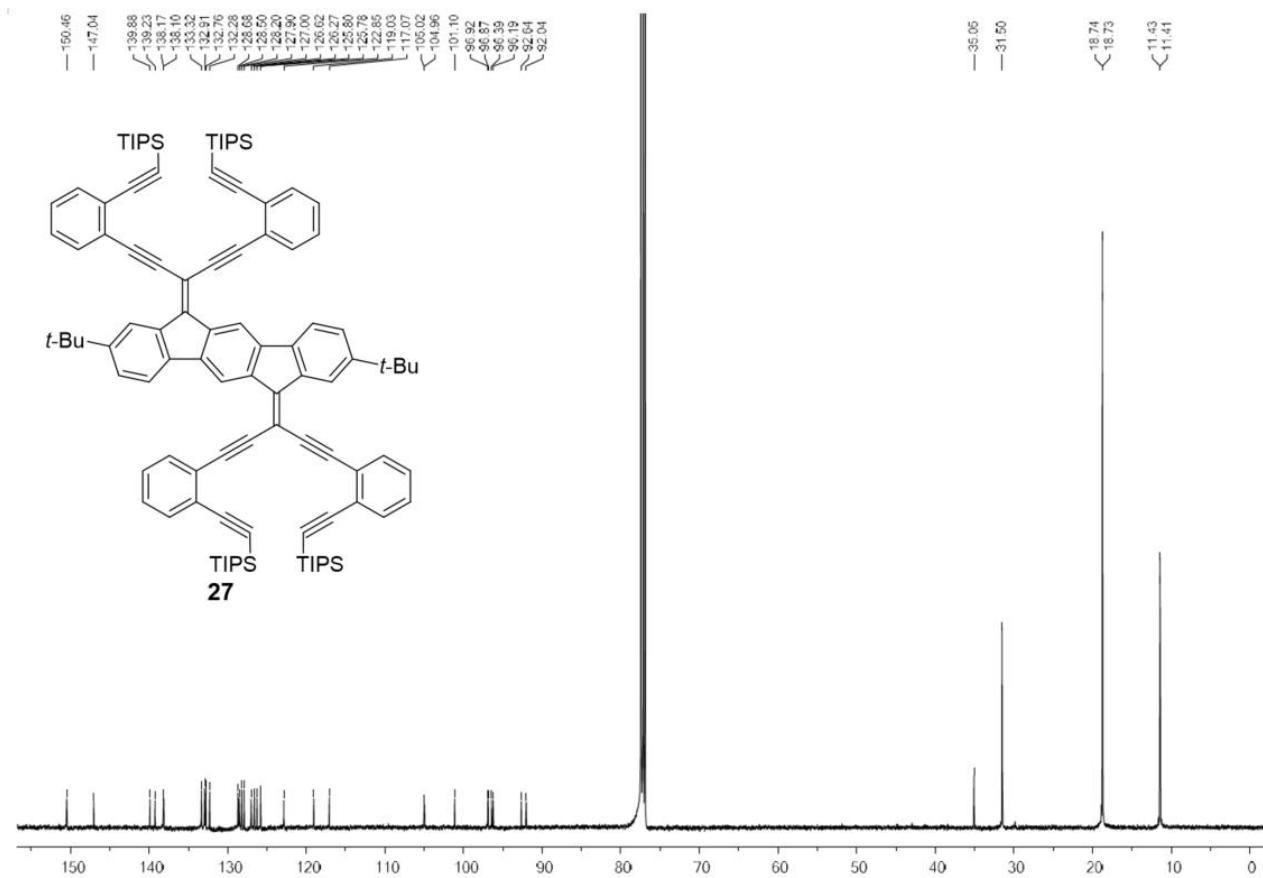

<sup>13</sup>C NMR spectrum (126 MHz, CDCl<sub>3</sub>) of 27.

## Electrochemistry

Compounds **11** and **15** were studied in MeCN and compounds **13**, **16**, **17**, **22**, **23**, **26**, and **27** in CH<sub>2</sub>Cl<sub>2</sub> (all measurements with 0.1 M Bu<sub>4</sub>NPF<sub>6</sub> as supporting electrolyte).

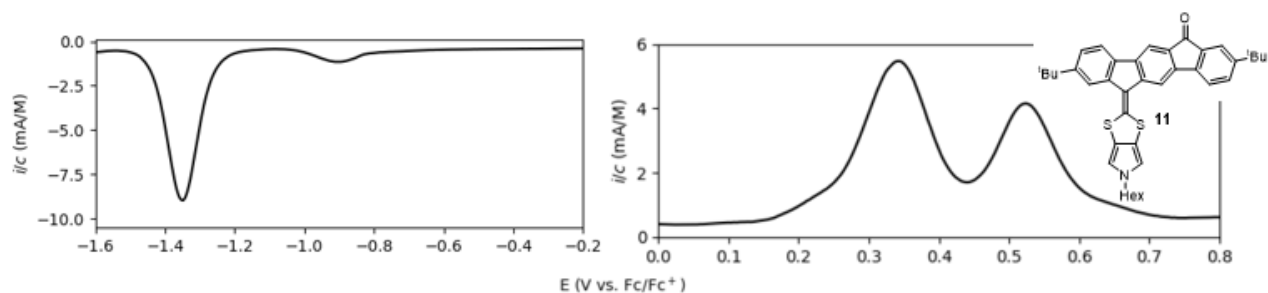

**Figure S5.** Differential pulse voltammograms of **11**.

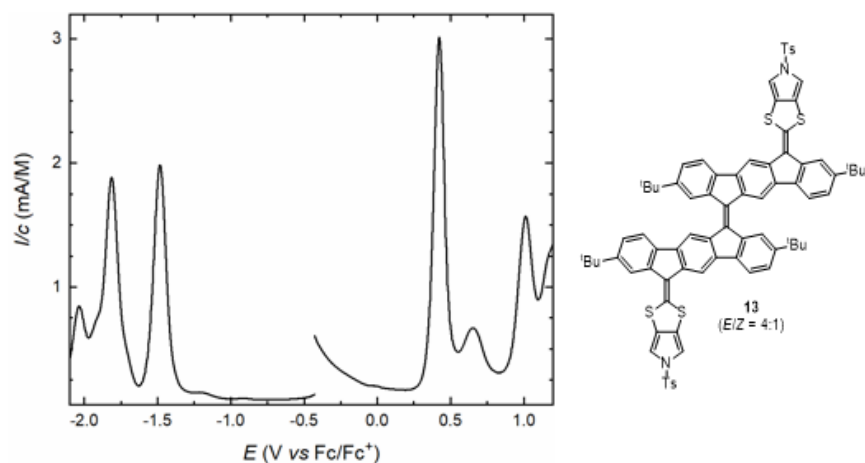

**Figure S6.** Differential pulse voltammograms of **13**.

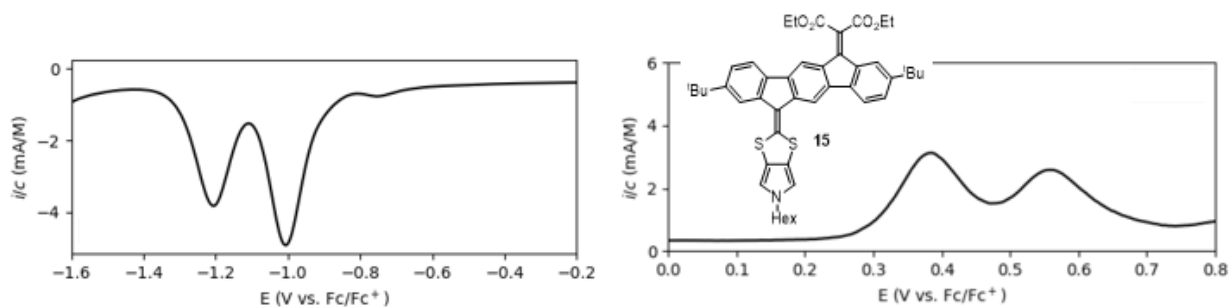

**Figure S7.** Differential pulse voltammograms of **15**.



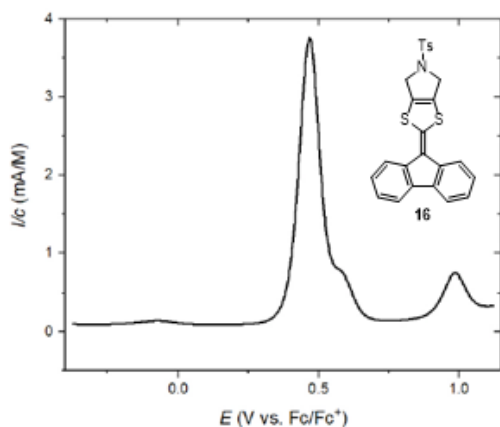

**Figure S8.** Differential pulse voltammogram of **16**.

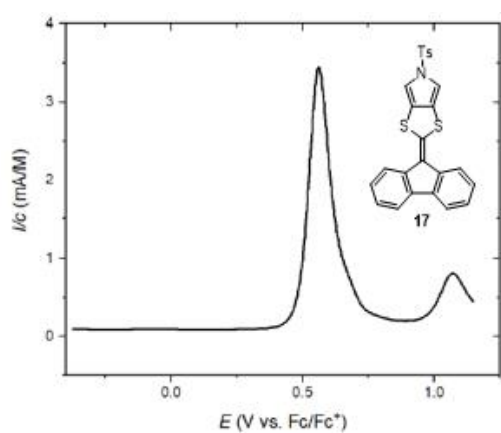

**Figure S9.** Differential pulse voltammogram of **17**.

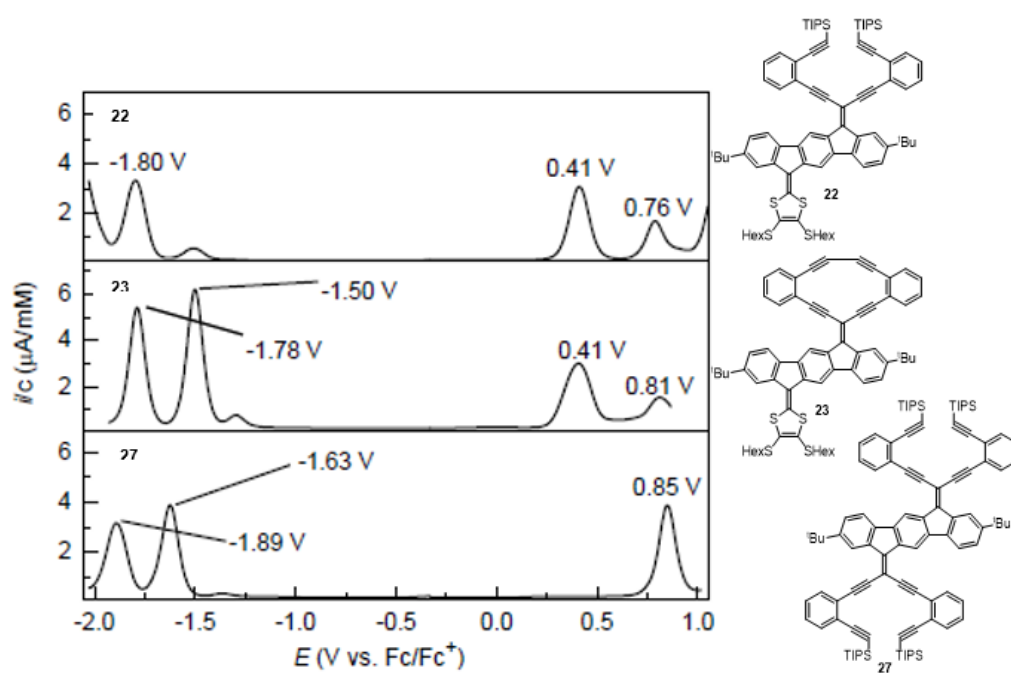

**Figure S10.** Differential pulse voltammograms of **22**, **23**, and **27**.

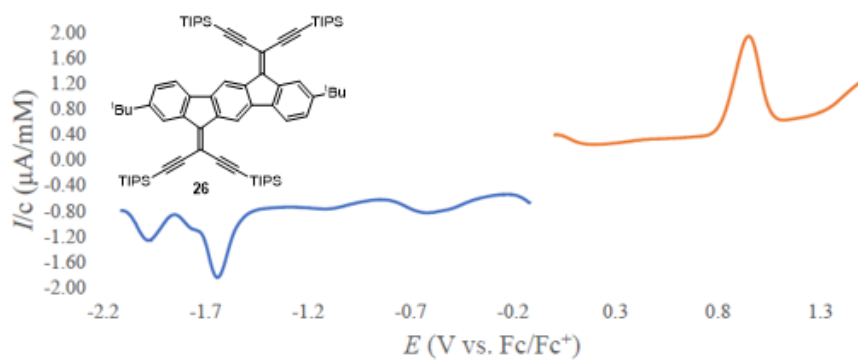

**Figure S11.** Differential pulse voltammograms of **26**.

# X-ray crystallographic data

## X-ray crystallographic data for compound 25

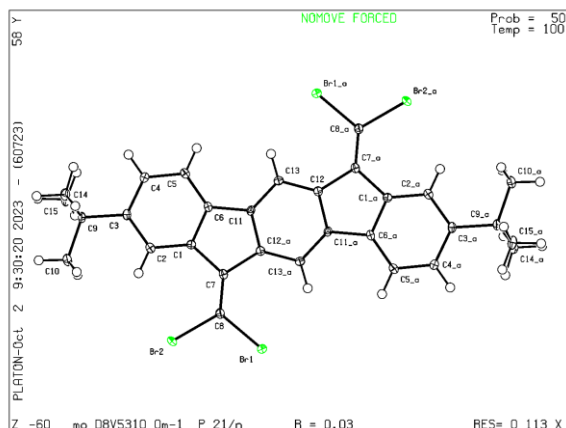

A yellow, Prism-shaped crystal of **25** was mounted on a MiTeGen micromount with perfluoroether oil. Data were collected from a shock-cooled single crystal at 100(2) K on a Bruker D8 VENTURE dual wavelength Mo/Cu three-circle diffractometer with a microfocus sealed X-ray tube using a mirror optics as monochromator and a Bruker PHOTON II detector. The diffractometer was equipped with an Oxford Cryostream 800 low temperature device and used MoK $\alpha$  radiation ( $\lambda = 0.71073 \text{ \AA}$ ). All data were integrated with SAINT and a multi-scan absorption correction using SADABS was applied.<sup>[2,3]</sup> The structure was solved by direct methods using SHELXT and refined by full-matrix least-squares methods against  $F^2$  by SHELXL-2019/2.<sup>[4,5]</sup> All non-hydrogen atoms were refined with anisotropic displacement parameters. All hydrogen atoms were refined isotropic on calculated positions using a riding model with their  $U_{\text{iso}}$  values constrained to 1.5 times the  $U_{\text{eq}}$  of their pivot atoms for terminal  $sp^3$  carbon atoms and 1.2 times for all other carbon atoms. Crystallographic data for the structures reported here have been deposited with the Cambridge Crystallographic Data Centre.<sup>[6]</sup> CCDC 2298562 contains the supplementary

crystallographic data for this paper. These data can be obtained free of charge from The Cambridge Crystallographic Data Centre via [www.ccdc.cam.ac.uk/structures](http://www.ccdc.cam.ac.uk/structures). This report and the CIF file were generated using FinalCif.<sup>[7]</sup>

**Table S1. Crystal data and structure refinement for 25**

|                                           |                                                                    |
|-------------------------------------------|--------------------------------------------------------------------|
| CCDC number                               | 2298652                                                            |
| Empirical formula                         | C <sub>30</sub> H <sub>26</sub> Br <sub>4</sub>                    |
| Formula weight                            | 706.15                                                             |
| Temperature [K]                           | 100(2)                                                             |
| Crystal system                            | monoclinic                                                         |
| Space group (number)                      | $P2_1/n$ (14)                                                      |
| $a$ [Å]                                   | 13.2258(8)                                                         |
| $b$ [Å]                                   | 7.3391(4)                                                          |
| $c$ [Å]                                   | 13.3672(7)                                                         |
| $\alpha$ [°]                              | 90                                                                 |
| $\beta$ [°]                               | 95.467(2)                                                          |
| $\gamma$ [°]                              | 90                                                                 |
| Volume [Å <sup>3</sup> ]                  | 1291.59(13)                                                        |
| $Z$                                       | 2                                                                  |
| $\rho_{\text{calc}}$ [gcm <sup>-3</sup> ] | 1.816                                                              |
| $\mu$ [mm <sup>-1</sup> ]                 | 6.250                                                              |
| $F(000)$                                  | 692                                                                |
| Crystal size [mm <sup>3</sup> ]           | 0.198x0.157x0.057                                                  |
| Crystal colour                            | yellow                                                             |
| Crystal shape                             | Prism                                                              |
| Radiation                                 | MoK $\alpha$<br>( $\lambda=0.71073 \text{ \AA}$ )                  |
| $2\theta$ range [°]                       | 4.55 to 57.40<br>(0.74 Å)                                          |
| Index ranges                              | $-17 \leq h \leq 17$<br>$-9 \leq k \leq 9$<br>$-18 \leq l \leq 14$ |
| Reflections collected                     | 27084                                                              |
| Independent reflections                   | 3334                                                               |
|                                           | $R_{\text{int}} = 0.0635$<br>$R_{\text{sigma}} = 0.0364$           |
| Completeness to $\theta = 25.242^\circ$   | 99.9 %                                                             |

Data / Restraints / 3334/0/157

Parameters

Goodness-of-fit on  $\chi^2$  1.080Final  $R$  indexes  $R_1 = 0.0251$ [ $\geq 2\sigma(I)$ ]  $wR_2 = 0.0579$ Final  $R$  indexes  $R_1 = 0.0321$ 

[all data]

 $wR_2 = 0.0602$ 

Largest peak/hole 0.51/-0.64

[ $e\text{\AA}^{-3}$ ]**Table S2. Atomic coordinates and  $U_{eq}$  [ $\text{\AA}^2$ ] for 25**

| Atom | x           | y          | z           | $U_{eq}$   |
|------|-------------|------------|-------------|------------|
| Br1  | 0.29892(2)  | 0.63650(3) | 0.30213(2)  | 0.01543(7) |
| C1   | 0.42044(14) | 0.6095(2)  | 0.61240(15) | 0.0093(4)  |
| Br2  | 0.27288(2)  | 0.33569(3) | 0.45940(2)  | 0.01515(7) |
| C2   | 0.39622(14) | 0.4607(3)  | 0.67120(15) | 0.0099(4)  |
| H2   | 0.360185    | 0.360102   | 0.640588    | 0.012      |
| C3   | 0.42458(14) | 0.4592(2)  | 0.77425(15) | 0.0098(4)  |
| C4   | 0.48072(15) | 0.6061(3)  | 0.81784(15) | 0.0121(4)  |
| H4   | 0.500465    | 0.605415   | 0.888057    | 0.014      |
| C5   | 0.50796(15) | 0.7526(3)  | 0.76017(15) | 0.0121(4)  |
| H5   | 0.547176    | 0.850073   | 0.790283    | 0.015      |
| C6   | 0.47708(14) | 0.7546(2)  | 0.65808(14) | 0.0093(4)  |
| C7   | 0.39576(15) | 0.6547(2)  | 0.50379(15) | 0.0090(4)  |
| C8   | 0.33639(15) | 0.5603(3)  | 0.43508(15) | 0.0107(4)  |
| C9   | 0.39588(15) | 0.3015(3)  | 0.84160(15) | 0.0114(4)  |
| C10  | 0.33549(17) | 0.1523(3)  | 0.78209(17) | 0.0163(4)  |
| H10A | 0.318839    | 0.054926   | 0.827957    | 0.024      |
| H10B | 0.376382    | 0.102253   | 0.731176    | 0.024      |
| H10C | 0.272658    | 0.204144   | 0.749091    | 0.024      |
| C11  | 0.49324(14) | 0.8929(3)  | 0.58244(14) | 0.0090(4)  |

|      |             |           |             |           |
|------|-------------|-----------|-------------|-----------|
| C12  | 0.55456(15) | 1.1656(2) | 0.51102(15) | 0.0092(4) |
| C13  | 0.54697(14) | 1.0558(3) | 0.59519(14) | 0.0104(4) |
| H13  | 0.577596    | 1.091211  | 0.659426    | 0.012     |
| C14  | 0.49348(16) | 0.2167(3) | 0.89362(16) | 0.0154(4) |
| H14A | 0.475682    | 0.116329  | 0.937021    | 0.023     |
| H14B | 0.531492    | 0.309495  | 0.934294    | 0.023     |
| H14C | 0.535435    | 0.170132  | 0.842669    | 0.023     |
| C15  | 0.32980(17) | 0.3753(3) | 0.92187(16) | 0.0168(4) |
| H15A | 0.317177    | 0.277610  | 0.969085    | 0.025     |
| H15B | 0.264946    | 0.419227  | 0.889055    | 0.025     |
| H15C | 0.365369    | 0.475861  | 0.958382    | 0.025     |

$U_{eq}$  is defined as 1/3 of the trace of the orthogonalized  $U_j$  tensor.

**Table S3. Anisotropic displacement parameters [ $\text{\AA}^2$ ] for 25. The anisotropic displacement factor exponent takes the form:  $-2\pi^2 [h^2(a^*)^2 U_{11} + k^2(b^*)^2 U_{22} + \dots + 2hka^*b^*U_{12}]$**

| Atom | $U_{11}$    | $U_{22}$    | $U_{33}$    | $U_{23}$   | $U_{13}$    | $U_{12}$    |
|------|-------------|-------------|-------------|------------|-------------|-------------|
| Br1  | 0.02016(12) | 0.01511(10) | 0.01020(11) | 0.00171(7) | -0.00281(8) | -0.00646(7) |
| C1   | 0.0103(9)   | 0.0088(8)   | 0.0090(9)   | -0.0009(7) | 0.0018(7)   | 0.0007(7)   |
| Br2  | 0.01921(12) | 0.01176(10) | 0.01395(11) | 0.00077(7) | -0.00127(8) | -0.00786(7) |
| C2   | 0.0086(9)   | 0.0086(8)   | 0.0129(9)   | 0.0002(7)  | 0.0018(7)   | 0.0004(7)   |
| C3   | 0.0095(9)   | 0.0090(8)   | 0.0112(9)   | 0.0022(7)  | 0.0027(7)   | 0.0014(7)   |
| C4   | 0.0143(10)  | 0.0121(9)   | 0.0096(9)   | 0.0018(7)  | 0.0005(8)   | -0.0015(7)  |
| C5   | 0.0139(10)  | 0.0090(9)   | 0.0133(10)  | 0.0002(7)  | 0.0007(8)   | -0.0020(7)  |
| C6   | 0.0091(9)   | 0.0076(8)   | 0.0114(9)   | 0.0013(7)  | 0.0022(7)   | -0.0003(7)  |
| C7   | 0.0092(9)   | 0.0073(8)   | 0.0109(9)   | 0.0002(7)  | 0.0027(7)   | 0.0011(6)   |
| C8   | 0.0122(9)   | 0.0092(8)   | 0.0109(9)   | 0.0008(7)  | 0.0020(7)   | -0.0001(7)  |
| C9   | 0.0127(10)  | 0.0108(8)   | 0.0107(9)   | 0.0035(7)  | 0.0019(7)   | -0.0020(7)  |

|     |            |            |            |            |            |            |
|-----|------------|------------|------------|------------|------------|------------|
| C10 | 0.0187(11) | 0.0131(9)  | 0.0168(11) | 0.0047(8)  | 0.0001(8)  | -0.0047(7) |
| C11 | 0.0107(9)  | 0.0093(8)  | 0.0074(9)  | 0.0004(7)  | 0.0033(7)  | 0.0003(7)  |
| C12 | 0.0100(9)  | 0.0086(8)  | 0.0094(9)  | -0.0006(7) | 0.0024(7)  | 0.0004(7)  |
| C13 | 0.0120(9)  | 0.0105(8)  | 0.0087(9)  | -0.0013(7) | 0.0011(7)  | -0.0006(7) |
| C14 | 0.0179(10) | 0.0117(9)  | 0.0160(10) | 0.0047(8)  | -0.0011(8) | -0.0002(8) |
| C15 | 0.0188(11) | 0.0187(10) | 0.0138(10) | 0.0046(8)  | 0.0061(8)  | -0.0016(8) |

**Table S4. Bond lengths and angles for 25.**

| Atom–Atom            | Length [Å] |                       |          |
|----------------------|------------|-----------------------|----------|
| Br1–C8               | 1.884(2)   | C9–C10                | 1.533(3) |
| C1–C2                | 1.400(3)   | C9–C14                | 1.538(3) |
| C1–C6                | 1.408(3)   | C9–C15                | 1.545(3) |
| C1–C7                | 1.495(3)   | C10–H10A              | 0.9800   |
| Br2–C8               | 1.8923(19) | C10–H10B              | 0.9800   |
| C2–C3                | 1.393(3)   | C10–H10C              | 0.9800   |
| C2–H2                | 0.9500     | C11–C13               | 1.393(3) |
| C3–C4                | 1.404(3)   | C11–C12 <sup>#1</sup> | 1.412(3) |
| C3–C9                | 1.536(3)   | C12–C13               | 1.395(3) |
| C4–C5                | 1.391(3)   | C13–H13               | 0.9500   |
| C4–H4                | 0.9500     | C14–H14A              | 0.9800   |
| C5–C6                | 1.387(3)   | C14–H14B              | 0.9800   |
| C5–H5                | 0.9500     | C14–H14C              | 0.9800   |
| C6–C11               | 1.463(3)   | C15–H15A              | 0.9800   |
| C7–C8                | 1.343(3)   | C15–H15B              | 0.9800   |
| C7–C12 <sup>#1</sup> | 1.495(2)   | C15–H15C              | 0.9800   |
|                      |            |                       |          |

| Atom-Atom-<br>Atom | Angle [°]  |
|--------------------|------------|
| C2-C1-C6           | 119.17(18) |
| C2-C1-C7           | 132.69(18) |
| C6-C1-C7           | 108.13(16) |
| C3-C2-C1           | 120.46(18) |
| C3-C2-H2           | 119.8      |
| C1-C2-H2           | 119.8      |
| C2-C3-C4           | 119.09(17) |
| C2-C3-C9           | 121.84(17) |
| C4-C3-C9           | 119.06(17) |
| C5-C4-C3           | 121.24(19) |
| C5-C4-H4           | 119.4      |
| C3-C4-H4           | 119.4      |
| C6-C5-C4           | 119.07(18) |
| C6-C5-H5           | 120.5      |
| C4-C5-H5           | 120.5      |
| C5-C6-C1           | 120.91(17) |
| C5-C6-C11          | 129.69(17) |
| C1-C6-C11          | 109.39(17) |
| C8-C7-C1           | 127.52(17) |
| C8-C7-C12          | 126.90(18) |
| C1-C7-C12          | 105.46(16) |
| C7-C8-Br1          | 125.19(15) |

|                   |            |
|-------------------|------------|
| C7-C8-Br2         | 124.91(15) |
| Br1-C8-Br2        | 109.84(10) |
| C10-C9-C3         | 112.32(17) |
| C10-C9-C14        | 108.56(16) |
| C3-C9-C14         | 109.05(15) |
| C10-C9-C15        | 108.04(16) |
| C3-C9-C15         | 109.33(16) |
| C14-C9-C15        | 109.50(17) |
| C9-C10-H10A       | 109.5      |
| C9-C10-H10B       | 109.5      |
| H10A-C10-<br>H10B | 109.5      |
| C9-C10-H10C       | 109.5      |
| H10A-C10-<br>H10C | 109.5      |
| H10B-C10-<br>H10C | 109.5      |
| C13-C11-C12       | 123.31(17) |
| C13-C11-C6        | 128.13(18) |
| C12-C11-C6        | 108.55(17) |
| C13-C12-C11       | 118.53(17) |
| C13-C12-C7        | 133.03(18) |
| C11-C12-C7        | 108.44(16) |
| C11-C13-C12       | 118.16(18) |

|                   |       |
|-------------------|-------|
| C11–C13–H13       | 120.9 |
| C12–C13–H13       | 120.9 |
| C9–C14–H14A       | 109.5 |
| C9–C14–H14B       | 109.5 |
| H14A–C14–<br>H14B | 109.5 |
| C9–C14–H14C       | 109.5 |
| H14A–C14–<br>H14C | 109.5 |
| H14B–C14–<br>H14C | 109.5 |

|                   |       |
|-------------------|-------|
| C9–C15–H15A       | 109.5 |
| C9–C15–H15B       | 109.5 |
| H15A–C15–<br>H15B | 109.5 |
| C9–C15–H15C       | 109.5 |
| H15A–C15–<br>H15C | 109.5 |
| H15B–C15–<br>H15C | 109.5 |

Symmetry transformations used to generate equivalent atoms:

#1: 1-X, 2-Y, 1-Z;

**Table S5. Torsion angles for 25.**

| Atom–Atom–<br>Atom–Atom | Torsion<br>Angle [°] |
|-------------------------|----------------------|
| C6–C1–C2–C3             | 2.3(3)               |
| C7–C1–C2–C3             | -175.90(18)          |
| C1–C2–C3–C4             | -2.1(3)              |
| C1–C2–C3–C9             | 177.71(17)           |
| C2–C3–C4–C5             | 0.2(3)               |
| C9–C3–C4–C5             | -179.55(17)          |
| C3–C4–C5–C6             | 1.3(3)               |
| C4–C5–C6–C1             | -1.1(3)              |
| C4–C5–C6–C11            | 178.26(19)           |
| C2–C1–C6–C5             | -0.7(3)              |

|                              |             |
|------------------------------|-------------|
| C7–C1–C6–C5                  | 177.91(17)  |
| C2–C1–C6–C11                 | 179.83(16)  |
| C7–C1–C6–C11                 | -1.6(2)     |
| C2–C1–C7–C8                  | 4.0(3)      |
| C6–C1–C7–C8                  | -174.36(19) |
| C2–C1–C7–C12 <sup>#1</sup>   | -179.75(19) |
| C6–C1–C7–C12 <sup>#1</sup>   | 1.9(2)      |
| C1–C7–C8–Br1                 | 174.07(14)  |
| C12 <sup>#1</sup> –C7–C8–Br1 | -1.4(3)     |
| C1–C7–C8–Br2                 | -2.9(3)     |
| C12 <sup>#1</sup> –C7–C8–Br2 | -178.39(14) |
| C2–C3–C9–C10                 | 0.6(3)      |



|                                    |             |
|------------------------------------|-------------|
| C4–C3–C9–C10                       | -179.60(18) |
| C2–C3–C9–C14                       | 120.99(19)  |
| C4–C3–C9–C14                       | -59.2(2)    |
| C2–C3–C9–C15                       | -119.3(2)   |
| C4–C3–C9–C15                       | 60.5(2)     |
| C5–C6–C11–C13                      | 2.0(3)      |
| C1–C6–C11–C13                      | -178.58(18) |
| C5–C6–C11–C12 <sup>#1</sup>        | -178.83(19) |
| C1–C6–C11–C12 <sup>#1</sup>        | 0.6(2)      |
| C12 <sup>#1</sup> –C11–C13–<br>C12 | -0.6(3)     |
| C6–C11–C13–C12                     | 178.42(18)  |
| C11 <sup>#1</sup> –C12–C13–<br>C11 | 0.6(3)      |
| C7 <sup>#1</sup> –C12–C13–<br>C11  | 179.59(19)  |

Symmetry transformations used to generate equivalent atoms:

#1: 1-X, 2-Y, 1-Z;

## X-ray crystallographic data for compound 26

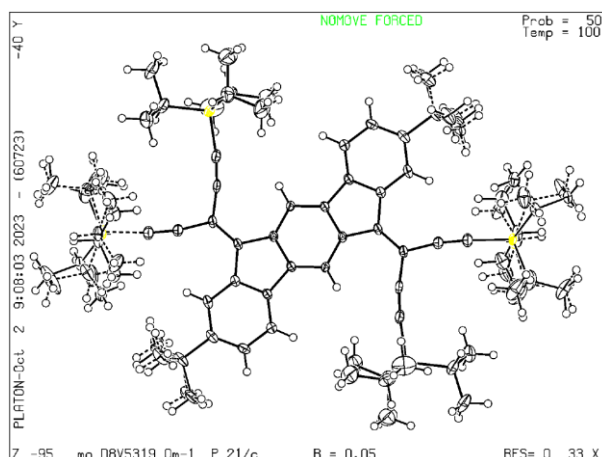

A red, Prism-shaped crystal of **26** was mounted on a MiTeGen micromount with perfluoroether oil. Data were collected from a shock-cooled single crystal at 100(2) K on a Bruker D8 VENTURE dual wavelength Mo/Cu three-circle diffractometer with a microfocus sealed X-ray tube using a mirror optics as monochromator and a Bruker PHOTON II detector. The diffractometer was equipped with an Oxford Cryostream 800 low temperature device and used MoK $\alpha$  radiation ( $\lambda = 0.71073$  Å). All data were integrated with SAINT and a multi-scan absorption correction using SADABS was applied.<sup>[2,3]</sup> The structure was solved by direct methods using SHELXT and refined by full-matrix least-squares methods against  $F^2$  by SHELXL-2019/2.<sup>[4,5]</sup> All non-hydrogen atoms were refined with anisotropic displacement parameters. All hydrogen atoms were refined with isotropic displacement parameters. Some were refined freely and some on calculated positions using a riding model with their  $U_{iso}$  values constrained to 1.5 times the  $U_{eq}$  of their pivot atoms for terminal sp<sup>3</sup> carbon atoms and 1.2 times for all other carbon atoms. The disordered Si-trisopropyl groups were modeled as two parts using SADI, RIGU and SIMU restraints. Two pairs of C-atoms were restrained using EADP due to their high displacement factors. The disordered tert-butyl group

was modelled as two parts using SADI, RIGU and SIMU restraints. Crystallographic data for the structures reported here have been deposited with the Cambridge Crystallographic Data Centre.<sup>[6]</sup> CCDC 2298654 contains the supplementary crystallographic data for this paper. These data can be obtained free of charge from The Cambridge Crystallographic Data Centre via [www.ccdc.cam.ac.uk/structures](http://www.ccdc.cam.ac.uk/structures). This report and the CIF file were generated using FinalCif.<sup>[7]</sup>

**Table S6. Crystal data and structure refinement for 26.**

|                                    |                                                                      |
|------------------------------------|----------------------------------------------------------------------|
| CCDC number                        | 2298654                                                              |
| Empirical formula                  | C <sub>74</sub> H <sub>110</sub> Si <sub>4</sub>                     |
| Formula weight                     | 1111.97                                                              |
| Temperature [K]                    | 100(2)                                                               |
| Crystal system                     | monoclinic                                                           |
| Space group                        | $P2_1/c$ (14)                                                        |
| (number)                           |                                                                      |
| $a$ [Å]                            | 17.1710(13)                                                          |
| $b$ [Å]                            | 12.6070(11)                                                          |
| $c$ [Å]                            | 18.4564(15)                                                          |
| $\alpha$ [°]                       | 90                                                                   |
| $\beta$ [°]                        | 117.037(3)                                                           |
| $\gamma$ [°]                       | 90                                                                   |
| Volume [Å <sup>3</sup> ]           | 3558.7(5)                                                            |
| $Z$                                | 2                                                                    |
| $\rho_{calc}$ [gcm <sup>-3</sup> ] | 1.038                                                                |
| $\mu$ [mm <sup>-1</sup> ]          | 0.121                                                                |
| $F(000)$                           | 1220                                                                 |
| Crystal size [mm <sup>3</sup> ]    | 0.193x0.119x0.102                                                    |
| Crystal colour                     | red                                                                  |
| Crystal shape                      | Prism                                                                |
| Radiation                          | MoK $\alpha$<br>( $\lambda=0.71073$ Å)                               |
| $2\theta$ range [°]                | 4.07 to 53.46<br>(0.79 Å)                                            |
| Index ranges                       | $-21 \leq h \leq 21$<br>$-15 \leq k \leq 15$<br>$-23 \leq l \leq 23$ |
| Reflections collected              | 66001                                                                |

|                                         |                                                                  |                                         |                                             |
|-----------------------------------------|------------------------------------------------------------------|-----------------------------------------|---------------------------------------------|
| Independent reflections                 | 7555<br>$R_{\text{int}} = 0.0889$<br>$R_{\text{sigma}} = 0.0416$ | Goodness-of-fit on $\chi^2$             | 1.056                                       |
| Completeness to $\theta = 25.242^\circ$ | 99.9 %                                                           | Final $R$ indexes [ $\geq 2\sigma(I)$ ] | $R_1 = 0.0505$<br>$wR_2 = 0.1116$           |
| Data / Restraints / Parameters          | 7555/180/495                                                     | Final $R$ indexes [all data]            | $R_1 = 0.0766$<br>$wR_2 = 0.1236$           |
|                                         |                                                                  | Largest peak/hole                       | 0.41/-0.39<br>[ $\text{e}\text{\AA}^{-3}$ ] |

**Table S7. Atomic coordinates and  $U_{\text{eq}}$  [ $\text{\AA}^2$ ] for 26.**

| Atom | x           | y           | z           | $U_{\text{eq}}$ |
|------|-------------|-------------|-------------|-----------------|
| C1   | 0.10143(11) | 0.31813(14) | 0.51153(11) | 0.0185(4)       |
| Si2  | 0.38701(3)  | 0.59837(4)  | 0.77968(3)  | 0.02454(14)     |
| C2   | 0.03976(11) | 0.24713(13) | 0.45658(10) | 0.0164(4)       |
| C3   | 0.06520(13) | 0.14571(14) | 0.44642(11) | 0.0202(4)       |
| H1C  | 0.0229(14)  | 0.0996(17)  | 0.4096(13)  | 0.030           |
| C4   | 0.15256(13) | 0.11411(14) | 0.49002(11) | 0.0234(4)       |
| C5   | 0.21203(14) | 0.18690(17) | 0.54253(13) | 0.0303(5)       |
| H1B  | 0.2710(16)  | 0.1674(19)  | 0.5704(15)  | 0.045           |
| C6   | 0.18773(13) | 0.28850(16) | 0.55375(13) | 0.0284(4)       |
| H1   | 0.2301(16)  | 0.3350(19)  | 0.5923(14)  | 0.043           |
| C7   | 0.05680(11) | 0.41734(13) | 0.51183(10) | 0.0167(4)       |
| C8   | 0.03246(11) | 0.59339(13) | 0.54361(10) | 0.0162(3)       |
| C9   | 0.04599(11) | 0.69892(13) | 0.58181(11) | 0.0164(4)       |
| C10  | 0.12129(11) | 0.73580(14) | 0.64396(11) | 0.0190(4)       |
| C11  | 0.12931(12) | 0.83560(15) | 0.68468(12) | 0.0236(4)       |
| C12  | 0.14696(13) | 0.91324(16) | 0.72614(13) | 0.0304(5)       |
| C15  | 0.17895(15) | 0.00121(15) | 0.47813(13) | 0.0311(5)       |

|      |             |             |             |           |
|------|-------------|-------------|-------------|-----------|
| C17  | 0.09023(11) | 0.50995(14) | 0.55550(11) | 0.0181(4) |
| H1AA | 0.1491(14)  | 0.5164(16)  | 0.5911(13)  | 0.027     |
| C18  | 0.20237(12) | 0.67874(15) | 0.67912(11) | 0.0223(4) |
| C19  | 0.27379(12) | 0.64176(15) | 0.71509(12) | 0.0259(4) |
| C20  | 0.44068(14) | 0.5768(2)   | 0.71240(14) | 0.0387(5) |
| H20  | 0.502545    | 0.555043    | 0.747880    | 0.046     |
| C21  | 0.4430(2)   | 0.6795(3)   | 0.67013(19) | 0.0658(8) |
| H21A | 0.471623    | 0.666899    | 0.635544    | 0.099     |
| H21B | 0.475644    | 0.733347    | 0.711049    | 0.099     |
| H21C | 0.383108    | 0.704486    | 0.636566    | 0.099     |
| C29  | 0.38165(15) | 0.47717(17) | 0.83689(14) | 0.0366(5) |
| H29  | 0.363467    | 0.502743    | 0.878219    | 0.044     |
| C30  | 0.31338(18) | 0.3960(2)   | 0.78506(17) | 0.0537(7) |
| H30A | 0.257123    | 0.431561    | 0.753830    | 0.081     |
| H30B | 0.307234    | 0.342063    | 0.820373    | 0.081     |
| H30C | 0.331825    | 0.362025    | 0.747603    | 0.081     |
| C31  | 0.43939(15) | 0.71311(19) | 0.85077(14) | 0.0425(6) |
| H31  | 0.426723    | 0.777801    | 0.815871    | 0.051     |
| C32  | 0.39801(18) | 0.7320(2)   | 0.90777(16) | 0.0598(8) |
| H32A | 0.334761    | 0.741452    | 0.875504    | 0.090     |
| H32B | 0.423351    | 0.795854    | 0.940319    | 0.090     |
| H32C | 0.409460    | 0.670809    | 0.943948    | 0.090     |
| C33  | 0.39781(18) | 0.4895(3)   | 0.64939(16) | 0.0567(8) |
| H33A | 0.335784    | 0.506079    | 0.616161    | 0.085     |

|      |             |             |             |            |
|------|-------------|-------------|-------------|------------|
| H33B | 0.403333    | 0.421558    | 0.677161    | 0.085      |
| H33C | 0.426764    | 0.484665    | 0.614384    | 0.085      |
| C36  | 0.47032(18) | 0.4244(2)   | 0.88450(19) | 0.0636(8)  |
| H36A | 0.493002    | 0.401814    | 0.846882    | 0.095      |
| H36B | 0.463983    | 0.362435    | 0.913455    | 0.095      |
| H36C | 0.511067    | 0.474929    | 0.923804    | 0.095      |
| C37  | 0.53924(17) | 0.7044(2)   | 0.89770(18) | 0.0639(8)  |
| H37A | 0.563138    | 0.689844    | 0.859554    | 0.096      |
| H37B | 0.554986    | 0.646503    | 0.937325    | 0.096      |
| H37C | 0.563402    | 0.771199    | 0.926226    | 0.096      |
| C16A | 0.1372(5)   | -0.0763(3)  | 0.5091(4)   | 0.0386(14) |
| H16A | 0.073530    | -0.069812   | 0.478490    | 0.058      |
| H16B | 0.155467    | -0.062538   | 0.566839    | 0.058      |
| H16C | 0.154914    | -0.148154   | 0.502589    | 0.058      |
| C27A | 0.1569(6)   | -0.0139(10) | 0.3879(4)   | 0.0274(13) |
| H27A | 0.093966    | -0.004197   | 0.353892    | 0.041      |
| H27B | 0.173725    | -0.085561   | 0.379807    | 0.041      |
| H27C | 0.189060    | 0.038401    | 0.372615    | 0.041      |
| C28A | 0.2817(3)   | -0.0129(4)  | 0.5276(3)   | 0.0409(13) |
| H28A | 0.297756    | -0.084948   | 0.519615    | 0.061      |
| H28B | 0.300043    | -0.000950   | 0.585565    | 0.061      |
| H28C | 0.310711    | 0.038548    | 0.508148    | 0.061      |
| C16B | 0.0994(6)   | -0.0806(6)  | 0.4708(7)   | 0.0294(17) |
| H16D | 0.044362    | -0.059732   | 0.424345    | 0.044      |

|      |            |            |            |            |
|------|------------|------------|------------|------------|
| H16E | 0.092829   | -0.076684  | 0.520810   | 0.044      |
| H16F | 0.114152   | -0.153356  | 0.463020   | 0.044      |
| C27B | 0.1764(13) | -0.009(2)  | 0.3966(8)  | 0.041(3)   |
| H27D | 0.118952   | 0.013759   | 0.354493   | 0.061      |
| H27E | 0.186808   | -0.082687  | 0.387248   | 0.061      |
| H27F | 0.221818   | 0.036421   | 0.394472   | 0.061      |
| C28B | 0.2577(7)  | -0.0419(8) | 0.5450(7)  | 0.048(2)   |
| H28D | 0.268232   | -0.113670  | 0.531054   | 0.072      |
| H28E | 0.249900   | -0.044400  | 0.594356   | 0.072      |
| H28F | 0.307710   | 0.003490   | 0.554358   | 0.072      |
| C13A | 0.1368(8)  | 0.9862(10) | 0.8672(6)  | 0.029(2)   |
| H13A | 0.151448   | 1.043984   | 0.908421   | 0.034      |
| C14A | 0.1747(6)  | 0.8821(10) | 0.9133(6)  | 0.0383(18) |
| H14A | 0.162370   | 0.824107   | 0.874168   | 0.057      |
| H14B | 0.147869   | 0.866357   | 0.948913   | 0.057      |
| H14C | 0.238093   | 0.889415   | 0.946077   | 0.057      |
| C22A | 0.2995(8)  | 1.0302(16) | 0.8492(11) | 0.049(5)   |
| H22A | 0.316393   | 0.958074   | 0.873896   | 0.059      |
| C23A | 0.337(3)   | 1.032(4)   | 0.7842(19) | 0.063(3)   |
| H23A | 0.310954   | 0.973838   | 0.745476   | 0.095      |
| H23B | 0.400473   | 1.024090   | 0.812267   | 0.095      |
| H23C | 0.321742   | 1.099902   | 0.754887   | 0.095      |
| C24A | 0.1479(3)  | 1.1596(4)  | 0.7490(3)  | 0.0230(11) |
| H24A | 0.197592   | 1.187020   | 0.740264   | 0.028      |

|      |           |            |           |            |
|------|-----------|------------|-----------|------------|
| C25A | 0.0668(4) | 1.1584(4)  | 0.6668(3) | 0.0293(12) |
| H25A | 0.053920  | 1.230624   | 0.644973  | 0.044      |
| H25B | 0.017043  | 1.130871   | 0.673443  | 0.044      |
| H25C | 0.077324  | 1.112770   | 0.629150  | 0.044      |
| C26A | 0.0353(4) | 0.9775(5)  | 0.8205(4) | 0.0348(14) |
| H26A | 0.010477  | 1.046735   | 0.797475  | 0.052      |
| H26B | 0.012667  | 0.954854   | 0.858202  | 0.052      |
| H26C | 0.018852  | 0.925338   | 0.776641  | 0.052      |
| C34A | 0.347(3)  | 1.101(4)   | 0.918(3)  | 0.051(3)   |
| H34A | 0.345291  | 1.173546   | 0.898402  | 0.076      |
| H34B | 0.408285  | 1.077669   | 0.947501  | 0.076      |
| H34C | 0.320333  | 1.099063   | 0.954945  | 0.076      |
| C35A | 0.1344(4) | 1.2372(8)  | 0.8076(5) | 0.0285(15) |
| H35A | 0.121213  | 1.308210   | 0.783368  | 0.043      |
| H35B | 0.187814  | 1.239987   | 0.859500  | 0.043      |
| H35C | 0.085664  | 1.212510   | 0.817093  | 0.043      |
| Si1A | 0.1796(4) | 1.0244(6)  | 0.7973(5) | 0.0194(8)  |
| C13B | 0.1462(7) | 0.9670(9)  | 0.8880(6) | 0.0226(18) |
| H13B | 0.156071  | 1.026397   | 0.927090  | 0.027      |
| C14B | 0.2034(6) | 0.8726(10) | 0.9368(6) | 0.040(2)   |
| H14D | 0.197227  | 0.814075   | 0.899603  | 0.060      |
| H14E | 0.184568  | 0.849007   | 0.976948  | 0.060      |
| H14F | 0.264766  | 0.894841   | 0.964805  | 0.060      |
| C22B | 0.3053(7) | 1.0138(15) | 0.8521(9) | 0.0208(18) |

|      |            |            |            |            |
|------|------------|------------|------------|------------|
| H22B | 0.325338   | 0.943951   | 0.880164   | 0.025      |
| C23B | 0.345(3)   | 1.025(4)   | 0.7979(19) | 0.063(3)   |
| H23D | 0.319353   | 0.972764   | 0.753827   | 0.095      |
| H23E | 0.408121   | 1.012631   | 0.828323   | 0.095      |
| H23F | 0.334335   | 1.096536   | 0.774873   | 0.095      |
| C24B | 0.1095(5)  | 1.1320(4)  | 0.7542(3)  | 0.0349(15) |
| H24B | 0.047557   | 1.106640   | 0.729571   | 0.042      |
| C25B | 0.1258(6)  | 1.1746(4)  | 0.6846(3)  | 0.047(2)   |
| H25D | 0.123833   | 1.115794   | 0.649074   | 0.070      |
| H25E | 0.183340   | 1.208537   | 0.707005   | 0.070      |
| H25F | 0.080525   | 1.226595   | 0.653171   | 0.070      |
| C26B | 0.0502(4)  | 0.9392(7)  | 0.8497(4)  | 0.0400(17) |
| H26D | 0.015426   | 1.002671   | 0.824473   | 0.060      |
| H26E | 0.035192   | 0.912587   | 0.891685   | 0.060      |
| H26F | 0.037701   | 0.884474   | 0.808216   | 0.060      |
| C34B | 0.342(4)   | 1.102(4)   | 0.921(3)   | 0.051(3)   |
| H34D | 0.317796   | 1.171357   | 0.897742   | 0.076      |
| H34E | 0.405639   | 1.104153   | 0.945485   | 0.076      |
| H34F | 0.324021   | 1.084801   | 0.963591   | 0.076      |
| C35B | 0.1165(10) | 1.2244(11) | 0.8103(8)  | 0.101(5)   |
| H35D | 0.069749   | 1.275610   | 0.780830   | 0.152      |
| H35E | 0.173405   | 1.259217   | 0.828492   | 0.152      |
| H35F | 0.111008   | 1.197796   | 0.857644   | 0.152      |
| Si1B | 0.1810(5)  | 1.0155(6)  | 0.8089(5)  | 0.0273(14) |

$U_{eq}$  is defined as  $1/3$  of the trace of the orthogonalized  $U_j$  tensor.



**Table S8. Anisotropic displacement parameters [ $\text{\AA}^2$ ] for 26. The anisotropic displacement factor exponent takes the form:  $-2\pi^2 [h^2(a^*)^2 U_{11} + k^2(b^*)^2 U_{22} + \dots + 2hka^*b^*U_{12}]$**

| Atom | $U_{11}$   | $U_{22}$   | $U_{33}$   | $U_{23}$    | $U_{13}$    | $U_{12}$    |
|------|------------|------------|------------|-------------|-------------|-------------|
| C1   | 0.0192(9)  | 0.0152(8)  | 0.0234(9)  | -0.0034(7)  | 0.0116(8)   | 0.0003(7)   |
| Si2  | 0.0173(3)  | 0.0230(3)  | 0.0277(3)  | -0.0062(2)  | 0.0053(2)   | -0.0045(2)  |
| C2   | 0.0183(9)  | 0.0139(8)  | 0.0218(9)  | -0.0024(7)  | 0.0133(7)   | -0.0024(7)  |
| C3   | 0.0280(10) | 0.0127(8)  | 0.0262(10) | -0.0036(7)  | 0.0177(8)   | -0.0026(7)  |
| C4   | 0.0345(11) | 0.0164(9)  | 0.0243(9)  | 0.0027(7)   | 0.0178(8)   | 0.0083(8)   |
| C5   | 0.0261(10) | 0.0297(11) | 0.0297(11) | -0.0047(9)  | 0.0078(9)   | 0.0129(9)   |
| C6   | 0.0215(10) | 0.0263(10) | 0.0310(11) | -0.0108(9)  | 0.0064(9)   | 0.0034(8)   |
| C7   | 0.0161(8)  | 0.0138(8)  | 0.0225(9)  | -0.0035(7)  | 0.0108(7)   | -0.0009(7)  |
| C8   | 0.0155(8)  | 0.0138(8)  | 0.0223(9)  | -0.0050(7)  | 0.0112(7)   | -0.0040(7)  |
| C9   | 0.0183(8)  | 0.0122(8)  | 0.0243(9)  | -0.0047(7)  | 0.0147(7)   | -0.0028(7)  |
| C10  | 0.0194(9)  | 0.0171(9)  | 0.0256(9)  | -0.0091(7)  | 0.0147(8)   | -0.0054(7)  |
| C11  | 0.0169(9)  | 0.0255(10) | 0.0318(10) | -0.0116(8)  | 0.0140(8)   | -0.0049(8)  |
| C12  | 0.0213(10) | 0.0302(11) | 0.0412(12) | -0.0181(9)  | 0.0155(9)   | -0.0059(8)  |
| C15  | 0.0471(12) | 0.0166(9)  | 0.0362(11) | 0.0031(8)   | 0.0248(10)  | 0.0131(8)   |
| C17  | 0.0130(8)  | 0.0166(9)  | 0.0237(9)  | -0.0077(7)  | 0.0073(7)   | -0.0028(7)  |
| C18  | 0.0216(10) | 0.0213(9)  | 0.0262(10) | -0.0147(8)  | 0.0127(8)   | -0.0097(8)  |
| C19  | 0.0223(10) | 0.0251(10) | 0.0298(10) | -0.0133(8)  | 0.0115(9)   | -0.0079(8)  |
| C20  | 0.0215(10) | 0.0560(15) | 0.0376(12) | -0.0003(11) | 0.0124(9)   | -0.0004(10) |
| C21  | 0.0562(17) | 0.084(2)   | 0.070(2)   | 0.0195(17)  | 0.0393(16)  | 0.0017(16)  |
| C29  | 0.0418(13) | 0.0307(11) | 0.0358(12) | -0.0019(9)  | 0.0165(10)  | -0.0033(10) |
| C30  | 0.0531(16) | 0.0376(14) | 0.0643(17) | 0.0014(12)  | 0.0212(14)  | -0.0187(12) |
| C31  | 0.0323(12) | 0.0330(12) | 0.0407(13) | -0.0107(10) | -0.0022(10) | -0.0070(10) |

|      |            |            |            |             |             |             |
|------|------------|------------|------------|-------------|-------------|-------------|
| C32  | 0.0594(17) | 0.0531(16) | 0.0455(15) | -0.0261(13) | 0.0051(13)  | 0.0121(14)  |
| C33  | 0.0467(15) | 0.083(2)   | 0.0463(15) | -0.0214(14) | 0.0263(13)  | 0.0005(14)  |
| C36  | 0.0534(17) | 0.0399(15) | 0.072(2)   | 0.0127(14)  | 0.0058(15)  | 0.0001(13)  |
| C37  | 0.0396(15) | 0.0557(17) | 0.0641(18) | -0.0215(14) | -0.0046(13) | -0.0184(13) |
| C16A | 0.065(4)   | 0.0178(17) | 0.042(3)   | 0.0113(19)  | 0.033(3)    | 0.010(2)    |
| C27A | 0.031(3)   | 0.022(3)   | 0.038(2)   | -0.0040(18) | 0.023(2)    | 0.005(2)    |
| C28A | 0.052(3)   | 0.021(2)   | 0.044(2)   | 0.0024(16)  | 0.0175(19)  | 0.0195(19)  |
| C16B | 0.040(3)   | 0.016(3)   | 0.026(4)   | 0.008(3)    | 0.011(3)    | 0.009(2)    |
| C27B | 0.058(8)   | 0.027(5)   | 0.049(3)   | 0.002(3)    | 0.035(4)    | 0.013(5)    |
| C28B | 0.050(4)   | 0.020(4)   | 0.059(4)   | 0.004(3)    | 0.013(3)    | 0.012(3)    |
| C13A | 0.039(3)   | 0.022(4)   | 0.030(5)   | -0.010(3)   | 0.021(3)    | -0.007(2)   |
| C14A | 0.052(5)   | 0.032(3)   | 0.044(4)   | -0.001(3)   | 0.034(4)    | 0.000(3)    |
| C22A | 0.053(7)   | 0.050(10)  | 0.051(6)   | -0.013(5)   | 0.031(5)    | -0.018(5)   |
| C23A | 0.042(6)   | 0.103(6)   | 0.051(7)   | -0.021(7)   | 0.027(7)    | -0.030(5)   |
| C24A | 0.029(2)   | 0.018(2)   | 0.028(2)   | -0.0059(15) | 0.0183(18)  | -0.0052(17) |
| C25A | 0.036(3)   | 0.024(2)   | 0.028(2)   | -0.0026(15) | 0.0153(19)  | -0.0069(19) |
| C26A | 0.038(3)   | 0.039(3)   | 0.037(4)   | -0.008(2)   | 0.025(3)    | -0.008(2)   |
| C34A | 0.043(5)   | 0.064(2)   | 0.036(3)   | -0.0132(19) | 0.010(3)    | -0.028(2)   |
| C35A | 0.026(2)   | 0.023(3)   | 0.031(3)   | -0.013(2)   | 0.008(2)    | 0.001(2)    |
| Si1A | 0.0184(13) | 0.0191(14) | 0.0194(16) | -0.0101(11) | 0.0073(10)  | -0.0029(9)  |
| C13B | 0.031(3)   | 0.024(4)   | 0.022(4)   | -0.009(3)   | 0.019(3)    | -0.008(3)   |
| C14B | 0.055(5)   | 0.025(3)   | 0.046(5)   | -0.001(3)   | 0.028(4)    | -0.001(4)   |
| C22B | 0.011(3)   | 0.017(3)   | 0.026(3)   | -0.002(2)   | 0.000(3)    | -0.006(2)   |
| C23B | 0.042(6)   | 0.103(6)   | 0.051(7)   | -0.021(7)   | 0.027(7)    | -0.030(5)   |

|      |            |            |          |             |            |            |
|------|------------|------------|----------|-------------|------------|------------|
| C24B | 0.056(4)   | 0.023(2)   | 0.035(3) | 0.0012(19)  | 0.029(3)   | 0.007(2)   |
| C25B | 0.082(6)   | 0.027(3)   | 0.038(3) | -0.003(2)   | 0.033(3)   | -0.012(3)  |
| C26B | 0.034(3)   | 0.063(5)   | 0.028(3) | -0.014(3)   | 0.018(3)   | -0.018(3)  |
| C34B | 0.043(5)   | 0.064(2)   | 0.036(3) | -0.0132(19) | 0.010(3)   | -0.028(2)  |
| C35B | 0.214(14)  | 0.042(5)   | 0.054(5) | 0.008(4)    | 0.065(7)   | 0.057(7)   |
| Si1B | 0.0369(17) | 0.0155(13) | 0.025(2) | -0.0109(13) | 0.0102(12) | -0.0004(9) |

**Table S9. Bond lengths and angles for 26.**

| Atom–Atom           | Length [Å] |
|---------------------|------------|
| C1–C6               | 1.376(3)   |
| C1–C2               | 1.405(2)   |
| C1–C7               | 1.468(2)   |
| Si2–C19             | 1.842(2)   |
| Si2–C20             | 1.872(2)   |
| Si2–C29             | 1.883(2)   |
| Si2–C31             | 1.884(2)   |
| C2–C3               | 1.391(2)   |
| C2–C9 <sup>#1</sup> | 1.478(2)   |
| C3–C4               | 1.400(3)   |
| C3–H1C              | 0.94(2)    |
| C4–C5               | 1.387(3)   |
| C4–C15              | 1.539(2)   |
| C5–C6               | 1.392(3)   |
| C5–H1B              | 0.94(2)    |
| C6–H1               | 0.95(2)    |

|                     |           |
|---------------------|-----------|
| C7–C17              | 1.386(2)  |
| C7–C8 <sup>#1</sup> | 1.410(2)  |
| C8–C17              | 1.393(2)  |
| C8–C9               | 1.474(2)  |
| C9–C10              | 1.362(2)  |
| C10–C18             | 1.434(3)  |
| C10–C11             | 1.440(2)  |
| C11–C12             | 1.194(3)  |
| C12–Si1A            | 1.826(7)  |
| C12–Si1B            | 1.877(8)  |
| C15–C28B            | 1.459(8)  |
| C15–C16A            | 1.472(4)  |
| C15–C27B            | 1.491(11) |
| C15–C27A            | 1.543(6)  |
| C15–C28A            | 1.585(5)  |
| C15–C16B            | 1.668(7)  |
| C17–H1AA            | 0.93(2)   |

|          |          |
|----------|----------|
| C18–C19  | 1.192(3) |
| C20–C21  | 1.521(4) |
| C20–C33  | 1.526(3) |
| C20–H20  | 1.0000   |
| C21–H21A | 0.9800   |
| C21–H21B | 0.9800   |
| C21–H21C | 0.9800   |
| C29–C36  | 1.522(3) |
| C29–C30  | 1.522(3) |
| C29–H29  | 1.0000   |
| C30–H30A | 0.9800   |
| C30–H30B | 0.9800   |
| C30–H30C | 0.9800   |
| C31–C32  | 1.532(4) |
| C31–C37  | 1.534(3) |
| C31–H31  | 1.0000   |
| C32–H32A | 0.9800   |
| C32–H32B | 0.9800   |
| C32–H32C | 0.9800   |
| C33–H33A | 0.9800   |
| C33–H33B | 0.9800   |
| C33–H33C | 0.9800   |
| C36–H36A | 0.9800   |
| C36–H36B | 0.9800   |

|           |           |
|-----------|-----------|
| C36–H36C  | 0.9800    |
| C37–H37A  | 0.9800    |
| C37–H37B  | 0.9800    |
| C37–H37C  | 0.9800    |
| C16A–H16A | 0.9800    |
| C16A–H16B | 0.9800    |
| C16A–H16C | 0.9800    |
| C27A–H27A | 0.9800    |
| C27A–H27B | 0.9800    |
| C27A–H27C | 0.9800    |
| C28A–H28A | 0.9800    |
| C28A–H28B | 0.9800    |
| C28A–H28C | 0.9800    |
| C16B–H16D | 0.9800    |
| C16B–H16E | 0.9800    |
| C16B–H16F | 0.9800    |
| C27B–H27D | 0.9800    |
| C27B–H27E | 0.9800    |
| C27B–H27F | 0.9800    |
| C28B–H28D | 0.9800    |
| C28B–H28E | 0.9800    |
| C28B–H28F | 0.9800    |
| C13A–C14A | 1.539(10) |
| C13A–C26A | 1.557(12) |

|           |           |
|-----------|-----------|
| C13A–Si1A | 1.816(10) |
| C13A–H13A | 1.0000    |
| C14A–H14A | 0.9800    |
| C14A–H14B | 0.9800    |
| C14A–H14C | 0.9800    |
| C22A–C34A | 1.46(6)   |
| C22A–C23A | 1.60(3)   |
| C22A–Si1A | 1.835(11) |
| C22A–H22A | 1.0000    |
| C23A–H23A | 0.9800    |
| C23A–H23B | 0.9800    |
| C23A–H23C | 0.9800    |
| C24A–C25A | 1.523(7)  |
| C24A–C35A | 1.552(9)  |
| C24A–Si1A | 1.885(8)  |
| C24A–H24A | 1.0000    |
| C25A–H25A | 0.9800    |
| C25A–H25B | 0.9800    |
| C25A–H25C | 0.9800    |
| C26A–H26A | 0.9800    |
| C26A–H26B | 0.9800    |
| C26A–H26C | 0.9800    |
| C34A–H34A | 0.9800    |
| C34A–H34B | 0.9800    |

|           |           |
|-----------|-----------|
| C34A–H34C | 0.9800    |
| C35A–H35A | 0.9800    |
| C35A–H35B | 0.9800    |
| C35A–H35C | 0.9800    |
| C13B–C26B | 1.510(11) |
| C13B–C14B | 1.545(9)  |
| C13B–Si1B | 1.912(10) |
| C13B–H13B | 1.0000    |
| C14B–H14D | 0.9800    |
| C14B–H14E | 0.9800    |
| C14B–H14F | 0.9800    |
| C22B–C23B | 1.45(3)   |
| C22B–C34B | 1.59(6)   |
| C22B–Si1B | 1.909(9)  |
| C22B–H22B | 1.0000    |
| C23B–H23D | 0.9800    |
| C23B–H23E | 0.9800    |
| C23B–H23F | 0.9800    |
| C24B–C35B | 1.526(13) |
| C24B–C25B | 1.530(9)  |
| C24B–Si1B | 1.887(8)  |
| C24B–H24B | 1.0000    |
| C25B–H25D | 0.9800    |
| C25B–H25E | 0.9800    |

|                            |                  |
|----------------------------|------------------|
| C25B–H25F                  | 0.9800           |
| C26B–H26D                  | 0.9800           |
| C26B–H26E                  | 0.9800           |
| C26B–H26F                  | 0.9800           |
| C34B–H34D                  | 0.9800           |
| C34B–H34E                  | 0.9800           |
| C34B–H34F                  | 0.9800           |
| C35B–H35D                  | 0.9800           |
| C35B–H35E                  | 0.9800           |
| C35B–H35F                  | 0.9800           |
|                            |                  |
| <b>Atom–Atom–<br/>Atom</b> | <b>Angle [°]</b> |
| C6–C1–C2                   | 120.00(16)       |
| C6–C1–C7                   | 131.22(17)       |
| C2–C1–C7                   | 108.78(15)       |
| C19–Si2–C20                | 107.87(10)       |
| C19–Si2–C29                | 107.31(10)       |
| C20–Si2–C29                | 114.72(11)       |
| C19–Si2–C31                | 104.60(9)        |
| C20–Si2–C31                | 110.51(11)       |
| C29–Si2–C31                | 111.22(11)       |
| C3–C2–C1                   | 120.19(16)       |
| C3–C2–C9                   | 131.60(16)       |

|            |            |
|------------|------------|
| C1–C2–C9   | 108.21(14) |
| C2–C3–C4   | 120.28(17) |
| C2–C3–H1C  | 118.7(13)  |
| C4–C3–H1C  | 121.0(13)  |
| C5–C4–C3   | 118.01(17) |
| C5–C4–C15  | 122.70(18) |
| C3–C4–C15  | 119.29(17) |
| C4–C5–C6   | 122.52(19) |
| C4–C5–H1B  | 118.6(15)  |
| C6–C5–H1B  | 118.9(15)  |
| C1–C6–C5   | 118.97(18) |
| C1–C6–H1   | 121.1(14)  |
| C5–C6–H1   | 119.9(14)  |
| C17–C7–C8  | 121.93(15) |
| C17–C7–C1  | 129.85(16) |
| C8–C7–C1   | 108.22(14) |
| C17–C8–C7  | 120.21(15) |
| C17–C8–C9  | 131.31(16) |
| C7–C8–C9   | 108.46(15) |
| C10–C9–C8  | 126.43(16) |
| C10–C9–C2  | 127.16(15) |
| C8–C9–C2   | 106.26(14) |
| C9–C10–C18 | 124.38(16) |
| C9–C10–C11 | 124.54(17) |

|                   |            |
|-------------------|------------|
| C18-C10-C11       | 111.06(15) |
| C12-C11-C10       | 170.9(2)   |
| C11-C12-Si1A      | 174.9(3)   |
| C11-C12-Si1B      | 168.3(3)   |
| C28B-C15-<br>C27B | 114.4(10)  |
| C28B-C15-C4       | 116.3(4)   |
| C16A-C15-C4       | 109.4(2)   |
| C27B-C15-C4       | 110.2(10)  |
| C16A-C15-<br>C27A | 114.4(5)   |
| C4-C15-C27A       | 108.9(5)   |
| C16A-C15-<br>C28A | 108.2(3)   |
| C4-C15-C28A       | 110.1(2)   |
| C27A-C15-<br>C28A | 105.7(4)   |
| C28B-C15-<br>C16B | 104.4(5)   |
| C27B-C15-<br>C16B | 102.7(9)   |
| C4-C15-C16B       | 107.4(3)   |
| C7-C17-C8         | 117.86(16) |
| C7-C17-H1AA       | 121.1(13)  |
| C8-C17-H1AA       | 121.0(13)  |

|                   |            |
|-------------------|------------|
| C19-C18-C10       | 171.70(19) |
| C18-C19-Si2       | 172.85(17) |
| C21-C20-C33       | 109.8(2)   |
| C21-C20-Si2       | 110.59(18) |
| C33-C20-Si2       | 113.44(16) |
| C21-C20-H20       | 107.6      |
| C33-C20-H20       | 107.6      |
| Si2-C20-H20       | 107.6      |
| C20-C21-H21A      | 109.5      |
| C20-C21-H21B      | 109.5      |
| H21A-C21-<br>H21B | 109.5      |
| C20-C21-H21C      | 109.5      |
| H21A-C21-<br>H21C | 109.5      |
| H21B-C21-<br>H21C | 109.5      |
| C36-C29-C30       | 110.6(2)   |
| C36-C29-Si2       | 112.79(17) |
| C30-C29-Si2       | 114.41(16) |
| C36-C29-H29       | 106.1      |
| C30-C29-H29       | 106.1      |
| Si2-C29-H29       | 106.1      |
| C29-C30-H30A      | 109.5      |

|                   |            |
|-------------------|------------|
| C29-C30-H30B      | 109.5      |
| H30A-C30-<br>H30B | 109.5      |
| C29-C30-H30C      | 109.5      |
| H30A-C30-<br>H30C | 109.5      |
| H30B-C30-<br>H30C | 109.5      |
| C32-C31-C37       | 111.8(2)   |
| C32-C31-Si2       | 111.96(17) |
| C37-C31-Si2       | 113.29(17) |
| C32-C31-H31       | 106.4      |
| C37-C31-H31       | 106.4      |
| Si2-C31-H31       | 106.4      |
| C31-C32-H32A      | 109.5      |
| C31-C32-H32B      | 109.5      |
| H32A-C32-<br>H32B | 109.5      |
| C31-C32-H32C      | 109.5      |
| H32A-C32-<br>H32C | 109.5      |
| H32B-C32-<br>H32C | 109.5      |
| C20-C33-H33A      | 109.5      |
| C20-C33-H33B      | 109.5      |

|                   |       |
|-------------------|-------|
| H33A-C33-<br>H33B | 109.5 |
| C20-C33-H33C      | 109.5 |
| H33A-C33-<br>H33C | 109.5 |
| H33B-C33-<br>H33C | 109.5 |
| C29-C36-H36A      | 109.5 |
| C29-C36-H36B      | 109.5 |
| H36A-C36-<br>H36B | 109.5 |
| C29-C36-H36C      | 109.5 |
| H36A-C36-<br>H36C | 109.5 |
| H36B-C36-<br>H36C | 109.5 |
| C31-C37-H37A      | 109.5 |
| C31-C37-H37B      | 109.5 |
| H37A-C37-<br>H37B | 109.5 |
| C31-C37-H37C      | 109.5 |
| H37A-C37-<br>H37C | 109.5 |
| H37B-C37-<br>H37C | 109.5 |



|                    |       |
|--------------------|-------|
| C15-C16A-<br>H16A  | 109.5 |
| C15-C16A-<br>H16B  | 109.5 |
| H16A-C16A-<br>H16B | 109.5 |
| C15-C16A-<br>H16C  | 109.5 |
| H16A-C16A-<br>H16C | 109.5 |
| H16B-C16A-<br>H16C | 109.5 |
| C15-C27A-<br>H27A  | 109.5 |
| C15-C27A-<br>H27B  | 109.5 |
| H27A-C27A-<br>H27B | 109.5 |
| C15-C27A-<br>H27C  | 109.5 |
| H27A-C27A-<br>H27C | 109.5 |
| H27B-C27A-<br>H27C | 109.5 |

|                    |       |
|--------------------|-------|
| C15-C28A-<br>H28A  | 109.5 |
| C15-C28A-<br>H28B  | 109.5 |
| H28A-C28A-<br>H28B | 109.5 |
| C15-C28A-<br>H28C  | 109.5 |
| H28A-C28A-<br>H28C | 109.5 |
| H28B-C28A-<br>H28C | 109.5 |
| C15-C16B-<br>H16D  | 109.5 |
| C15-C16B-<br>H16E  | 109.5 |
| H16D-C16B-<br>H16E | 109.5 |
| C15-C16B-<br>H16F  | 109.5 |
| H16D-C16B-<br>H16F | 109.5 |
| H16E-C16B-<br>H16F | 109.5 |

|                    |       |
|--------------------|-------|
| C15–C27B–<br>H27D  | 109.5 |
| C15–C27B–<br>H27E  | 109.5 |
| H27D–C27B–<br>H27E | 109.5 |
| C15–C27B–<br>H27F  | 109.5 |
| H27D–C27B–<br>H27F | 109.5 |
| H27E–C27B–<br>H27F | 109.5 |
| C15–C28B–<br>H28D  | 109.5 |
| C15–C28B–<br>H28E  | 109.5 |
| H28D–C28B–<br>H28E | 109.5 |
| C15–C28B–<br>H28F  | 109.5 |
| H28D–C28B–<br>H28F | 109.5 |
| H28E–C28B–<br>H28F | 109.5 |

|                    |          |
|--------------------|----------|
| C14A–C13A–<br>C26A | 109.4(7) |
| C14A–C13A–<br>Si1A | 114.4(9) |
| C26A–C13A–<br>Si1A | 109.8(6) |
| C14A–C13A–<br>H13A | 107.7    |
| C26A–C13A–<br>H13A | 107.7    |
| Si1A–C13A–<br>H13A | 107.7    |
| C13A–C14A–<br>H14A | 109.5    |
| C13A–C14A–<br>H14B | 109.5    |
| H14A–C14A–<br>H14B | 109.5    |
| C13A–C14A–<br>H14C | 109.5    |
| H14A–C14A–<br>H14C | 109.5    |
| H14B–C14A–<br>H14C | 109.5    |

|                    |           |
|--------------------|-----------|
| C34A-C22A-<br>C23A | 113(3)    |
| C34A-C22A-<br>Si1A | 122(2)    |
| C23A-C22A-<br>Si1A | 110.3(18) |
| C34A-C22A-<br>H22A | 103.0     |
| C23A-C22A-<br>H22A | 103.0     |
| Si1A-C22A-<br>H22A | 103.0     |
| C22A-C23A-<br>H23A | 109.5     |
| C22A-C23A-<br>H23B | 109.5     |
| H23A-C23A-<br>H23B | 109.5     |
| C22A-C23A-<br>H23C | 109.5     |
| H23A-C23A-<br>H23C | 109.5     |
| H23B-C23A-<br>H23C | 109.5     |

|                    |          |
|--------------------|----------|
| C25A-C24A-<br>C35A | 110.1(4) |
| C25A-C24A-<br>Si1A | 113.5(4) |
| C35A-C24A-<br>Si1A | 110.0(5) |
| C25A-C24A-<br>H24A | 107.7    |
| C35A-C24A-<br>H24A | 107.7    |
| Si1A-C24A-<br>H24A | 107.7    |
| C24A-C25A-<br>H25A | 109.5    |
| C24A-C25A-<br>H25B | 109.5    |
| H25A-C25A-<br>H25B | 109.5    |
| C24A-C25A-<br>H25C | 109.5    |
| H25A-C25A-<br>H25C | 109.5    |
| H25B-C25A-<br>H25C | 109.5    |

|                    |       |
|--------------------|-------|
| C13A–C26A–<br>H26A | 109.5 |
| C13A–C26A–<br>H26B | 109.5 |
| H26A–C26A–<br>H26B | 109.5 |
| C13A–C26A–<br>H26C | 109.5 |
| H26A–C26A–<br>H26C | 109.5 |
| H26B–C26A–<br>H26C | 109.5 |
| C22A–C34A–<br>H34A | 109.5 |
| C22A–C34A–<br>H34B | 109.5 |
| H34A–C34A–<br>H34B | 109.5 |
| C22A–C34A–<br>H34C | 109.5 |
| H34A–C34A–<br>H34C | 109.5 |
| H34B–C34A–<br>H34C | 109.5 |

|                    |          |
|--------------------|----------|
| C24A–C35A–<br>H35A | 109.5    |
| C24A–C35A–<br>H35B | 109.5    |
| H35A–C35A–<br>H35B | 109.5    |
| C24A–C35A–<br>H35C | 109.5    |
| H35A–C35A–<br>H35C | 109.5    |
| H35B–C35A–<br>H35C | 109.5    |
| C13A–Si1A–C12      | 102.4(6) |
| C13A–Si1A–<br>C22A | 111.2(9) |
| C12–Si1A–C22A      | 108.1(7) |
| C13A–Si1A–<br>C24A | 116.9(5) |
| C12–Si1A–C24A      | 115.2(4) |
| C22A–Si1A–<br>C24A | 103.0(7) |
| C26B–C13B–<br>C14B | 111.4(7) |
| C26B–C13B–<br>Si1B | 111.8(6) |

|                    |           |
|--------------------|-----------|
| C14B-C13B-<br>Si1B | 110.8(8)  |
| C26B-C13B-<br>H13B | 107.6     |
| C14B-C13B-<br>H13B | 107.6     |
| Si1B-C13B-<br>H13B | 107.6     |
| C13B-C14B-<br>H14D | 109.5     |
| C13B-C14B-<br>H14E | 109.5     |
| H14D-C14B-<br>H14E | 109.5     |
| C13B-C14B-<br>H14F | 109.5     |
| H14D-C14B-<br>H14F | 109.5     |
| H14E-C14B-<br>H14F | 109.5     |
| C23B-C22B-<br>C34B | 111(3)    |
| C23B-C22B-<br>Si1B | 119.8(19) |

|                    |          |
|--------------------|----------|
| C34B-C22B-<br>Si1B | 106(2)   |
| C23B-C22B-<br>H22B | 106.4    |
| C34B-C22B-<br>H22B | 106.4    |
| Si1B-C22B-<br>H22B | 106.4    |
| C22B-C23B-<br>H23D | 109.5    |
| C22B-C23B-<br>H23E | 109.5    |
| H23D-C23B-<br>H23E | 109.5    |
| C22B-C23B-<br>H23F | 109.5    |
| H23D-C23B-<br>H23F | 109.5    |
| H23E-C23B-<br>H23F | 109.5    |
| C35B-C24B-<br>C25B | 108.3(7) |
| C35B-C24B-<br>Si1B | 113.5(7) |

|                    |          |
|--------------------|----------|
| C25B-C24B-<br>Si1B | 113.5(5) |
| C35B-C24B-<br>H24B | 107.0    |
| C25B-C24B-<br>H24B | 107.0    |
| Si1B-C24B-<br>H24B | 107.0    |
| C24B-C25B-<br>H25D | 109.5    |
| C24B-C25B-<br>H25E | 109.5    |
| H25D-C25B-<br>H25E | 109.5    |
| C24B-C25B-<br>H25F | 109.5    |
| H25D-C25B-<br>H25F | 109.5    |
| H25E-C25B-<br>H25F | 109.5    |
| C13B-C26B-<br>H26D | 109.5    |
| C13B-C26B-<br>H26E | 109.5    |

|                    |       |
|--------------------|-------|
| H26D-C26B-<br>H26E | 109.5 |
| C13B-C26B-<br>H26F | 109.5 |
| H26D-C26B-<br>H26F | 109.5 |
| H26E-C26B-<br>H26F | 109.5 |
| C22B-C34B-<br>H34D | 109.5 |
| C22B-C34B-<br>H34E | 109.5 |
| H34D-C34B-<br>H34E | 109.5 |
| C22B-C34B-<br>H34F | 109.5 |
| H34D-C34B-<br>H34F | 109.5 |
| H34E-C34B-<br>H34F | 109.5 |
| C24B-C35B-<br>H35D | 109.5 |
| C24B-C35B-<br>H35E | 109.5 |

|                    |          |
|--------------------|----------|
| H35D–C35B–<br>H35E | 109.5    |
| C24B–C35B–<br>H35F | 109.5    |
| H35D–C35B–<br>H35F | 109.5    |
| H35E–C35B–<br>H35F | 109.5    |
| C12–Si1B–C24B      | 102.3(4) |
| C12–Si1B–C22B      | 102.0(7) |
| C24B–Si1B–<br>C22B | 124.4(7) |
| C12–Si1B–C13B      | 108.1(6) |
| C24B–Si1B–<br>C13B | 107.7(5) |
| C22B–Si1B–<br>C13B | 110.8(8) |

Symmetry transformations used to generate equivalent atoms:

#1: -X, 1-Y, 1-Z;

**Table S10. Torsion angles for 26.**

| <b>Atom–Atom–<br/>Atom–Atom</b>          | <b>Torsion<br/>Angle [°]</b> |
|------------------------------------------|------------------------------|
| C6–C1–C2–C3                              | 1.9(3)                       |
| C7–C1–C2–C3                              | -178.43(16)                  |
| C6–C1–C2–C9 <sup>#1</sup>                | -177.91(17)                  |
| C7–C1–C2–C9 <sup>#1</sup>                | 1.79(19)                     |
| C1–C2–C3–C4                              | -0.8(3)                      |
| C9 <sup>#1</sup> –C2–C3–C4               | 178.87(17)                   |
| C2–C3–C4–C5                              | -0.4(3)                      |
| C2–C3–C4–C15                             | 179.59(17)                   |
| C3–C4–C5–C6                              | 0.7(3)                       |
| C15–C4–C5–C6                             | -179.3(2)                    |
| C2–C1–C6–C5                              | -1.6(3)                      |
| C7–C1–C6–C5                              | 178.8(2)                     |
| C4–C5–C6–C1                              | 0.3(3)                       |
| C6–C1–C7–C17                             | 0.1(3)                       |
| C2–C1–C7–C17                             | -179.52(18)                  |
| C6–C1–C7–C8 <sup>#1</sup>                | 179.4(2)                     |
| C2–C1–C7–C8 <sup>#1</sup>                | -0.3(2)                      |
| C17–C8–C9–C10                            | -4.7(3)                      |
| C7 <sup>#1</sup> –C8–C9–C10              | 173.49(17)                   |
| C17–C8–C9–C2 <sup>#1</sup>               | 179.36(18)                   |
| C7 <sup>#1</sup> –C8–C9–C2 <sup>#1</sup> | -2.40(19)                    |



|                              |             |
|------------------------------|-------------|
| C8-C9-C10-C18                | 4.2(3)      |
| C2 <sup>#1</sup> -C9-C10-C18 | 179.29(17)  |
| C8-C9-C10-C11                | -173.72(17) |
| C2 <sup>#1</sup> -C9-C10-C11 | 1.3(3)      |
| C5-C4-C15-C28B               | 24.0(7)     |
| C3-C4-C15-C28B               | -156.0(7)   |
| C5-C4-C15-C16A               | 113.9(4)    |
| C3-C4-C15-C16A               | -66.1(4)    |
| C5-C4-C15-C27B               | -108.3(8)   |
| C3-C4-C15-C27B               | 71.7(8)     |
| C5-C4-C15-C27A               | -120.3(4)   |
| C3-C4-C15-C27A               | 59.6(4)     |
| C5-C4-C15-C28A               | -4.9(4)     |
| C3-C4-C15-C28A               | 175.1(3)    |
| C5-C4-C15-C16B               | 140.5(4)    |
| C3-C4-C15-C16B               | -39.5(4)    |
| C8 <sup>#1</sup> -C7-C17-C8  | 0.5(3)      |
| C1-C7-C17-C8                 | 179.65(17)  |
| C7 <sup>#1</sup> -C8-C17-C7  | -0.5(3)     |
| C9-C8-C17-C7                 | 177.58(17)  |
| C19-Si2-C20-C21              | 61.4(2)     |
| C29-Si2-C20-C21              | -179.11(17) |
| C31-Si2-C20-C21              | -52.4(2)    |
| C19-Si2-C20-C33              | -62.5(2)    |

|                         |             |
|-------------------------|-------------|
| C29–Si2–C20–C33         | 57.0(2)     |
| C31–Si2–C20–C33         | -176.32(18) |
| C19–Si2–C29–C36         | 172.53(18)  |
| C20–Si2–C29–C36         | 52.7(2)     |
| C31–Si2–C29–C36         | -73.6(2)    |
| C19–Si2–C29–C30         | 45.0(2)     |
| C20–Si2–C29–C30         | -74.8(2)    |
| C31–Si2–C29–C30         | 158.84(18)  |
| C19–Si2–C31–C32         | 65.06(19)   |
| C20–Si2–C31–C32         | -179.10(17) |
| C29–Si2–C31–C32         | -50.5(2)    |
| C19–Si2–C31–C37         | -167.4(2)   |
| C20–Si2–C31–C37         | -51.5(2)    |
| C29–Si2–C31–C37         | 77.1(2)     |
| C14A–C13A–Si1A–<br>C12  | 61.0(8)     |
| C26A–C13A–Si1A–<br>C12  | -62.4(8)    |
| C14A–C13A–Si1A–<br>C22A | -54.3(11)   |
| C26A–C13A–Si1A–<br>C22A | -177.7(9)   |
| C14A–C13A–Si1A–<br>C24A | -172.1(6)   |

|                         |          |
|-------------------------|----------|
| C26A-C13A-Si1A-<br>C24A | 64.5(9)  |
| C34A-C22A-Si1A-<br>C13A | -60(3)   |
| C23A-C22A-Si1A-<br>C13A | 164(2)   |
| C34A-C22A-Si1A-<br>C12  | -171(2)  |
| C23A-C22A-Si1A-<br>C12  | 53(2)    |
| C34A-C22A-Si1A-<br>C24A | 66(3)    |
| C23A-C22A-Si1A-<br>C24A | -70(2)   |
| C25A-C24A-Si1A-<br>C13A | -93.0(7) |
| C35A-C24A-Si1A-<br>C13A | 30.8(7)  |
| C25A-C24A-Si1A-<br>C12  | 27.4(6)  |
| C35A-C24A-Si1A-<br>C12  | 151.2(4) |
| C25A-C24A-Si1A-<br>C22A | 144.8(8) |

|                         |            |
|-------------------------|------------|
| C35A–C24A–Si1A–<br>C22A | -91.3(8)   |
| C11–C12–Si1B–<br>C24B   | -150.6(13) |
| C11–C12–Si1B–<br>C22B   | 79.8(16)   |
| C11–C12–Si1B–<br>C13B   | -37.1(17)  |
| C35B–C24B–Si1B–<br>C12  | 173.6(7)   |
| C25B–C24B–Si1B–<br>C12  | -62.1(7)   |
| C35B–C24B–Si1B–<br>C22B | -72.3(11)  |
| C25B–C24B–Si1B–<br>C22B | 51.9(10)   |
| C35B–C24B–Si1B–<br>C13B | 59.8(9)    |
| C25B–C24B–Si1B–<br>C13B | -176.0(6)  |

Symmetry transformations used to generate equivalent atoms:

#1: -X, 1-Y, 1-Z;

## X-ray crystallographic data for compound 29

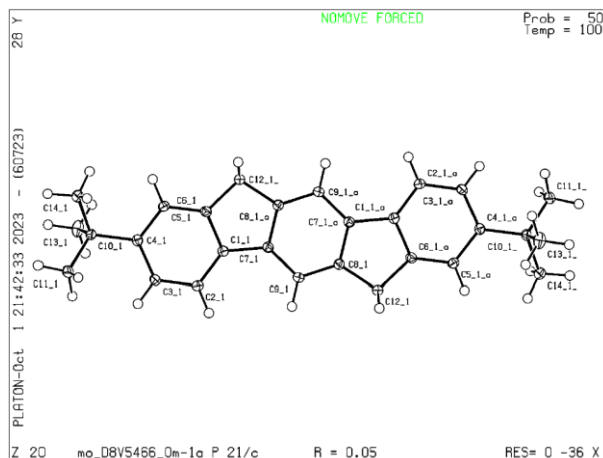

A yellow, Prism-shaped crystal of **29** was mounted on a MiTeGen micromount with perfluoroether oil. Data were collected from a shock-cooled single crystal at 100(2) K on a Bruker D8 VENTURE dual wavelength Mo/Cu three-circle diffractometer with a microfocus sealed X-ray tube using a mirror optics as monochromator and a Bruker PHOTON II detector. The diffractometer was equipped with an Oxford Cryostream 800 low temperature device and used MoK $\alpha$  radiation ( $\lambda = 0.71073 \text{ \AA}$ ). All data were integrated with SAINT and a multi-scan absorption correction using SADABS was applied.<sup>[2,3]</sup> The structure was solved by direct methods using SHELXT and refined by full-matrix least-squares methods against  $F^2$  by SHELXL-2019/2.<sup>[4,5]</sup> All non-hydrogen atoms were refined with anisotropic displacement parameters. All hydrogen atoms were refined isotropic on calculated positions using a riding model with their  $U_{\text{iso}}$  values constrained to 1.5 times the  $U_{\text{eq}}$  of their pivot atoms for terminal sp<sup>3</sup> carbon atoms and 1.2 times for all other carbon atoms. Crystallographic data for the structures reported here have been deposited with the Cambridge Crystallographic Data Centre.<sup>[6]</sup> CCDC 2298651 contains the supplementary crystallographic data for this paper. These data can be obtained free of charge from

The Cambridge Crystallographic Data Centre via [www.ccdc.cam.ac.uk/structures](http://www.ccdc.cam.ac.uk/structures). This report and the CIF file were generated using FinalCif.<sup>[7]</sup>

**Table S10. Crystal data and structure refinement for 29.**

|                                           |                                                                    |
|-------------------------------------------|--------------------------------------------------------------------|
| CCDC number                               | 2298651                                                            |
| Empirical formula                         | C <sub>28</sub> H <sub>30</sub>                                    |
| Formula weight                            | 366.52                                                             |
| Temperature [K]                           | 100(2)                                                             |
| Crystal system                            | monoclinic                                                         |
| Space group                               | $P2_1/c$ (14)                                                      |
| (number)                                  |                                                                    |
| $a$ [Å]                                   | 16.0713(8)                                                         |
| $b$ [Å]                                   | 5.9999(3)                                                          |
| $c$ [Å]                                   | 10.4377(5)                                                         |
| $\alpha$ [°]                              | 90                                                                 |
| $\beta$ [°]                               | 92.484(2)                                                          |
| $\gamma$ [°]                              | 90                                                                 |
| Volume [Å <sup>3</sup> ]                  | 1005.52(9)                                                         |
| $Z$                                       | 2                                                                  |
| $\rho_{\text{calc}}$ [gcm <sup>-3</sup> ] | 1.211                                                              |
| $\mu$ [mm <sup>-1</sup> ]                 | 0.068                                                              |
| $F(000)$                                  | 396                                                                |
| Crystal size [mm <sup>3</sup> ]           | 0.219×0.177×0.173                                                  |
| Crystal colour                            | yellow                                                             |
| Crystal shape                             | Prism                                                              |
| Radiation                                 | MoK $\alpha$<br>( $\lambda=0.71073 \text{ \AA}$ )                  |
| $2\theta$ range [°]                       | 5.07 to 60.02<br>(0.71 Å)                                          |
| Index ranges                              | $-22 \leq h \leq 22$<br>$-8 \leq k \leq 8$<br>$-14 \leq l \leq 14$ |
| Reflections collected                     | 26009                                                              |
| Independent reflections                   | 2946<br>$R_{\text{int}} = 0.0642$<br>$R_{\text{sigma}} = 0.0365$   |
| Completeness to $\theta = 25.242^\circ$   | 99.7 %                                                             |
| Data / Restraints / Parameters            | 2946/0/130                                                         |
| Goodness-of-fit on $F^2$                  | 1.038                                                              |
| Final $R$ indexes [ $\geq 2\sigma(I)$ ]   | $R_1 = 0.0477$<br>$wR_2 = 0.1152$                                  |

Final  $R$  indexes  $R_1 = 0.0670$  Largest peak/hole 0.40/-0.24  
 [all data]  $wR_2 = 0.1250$  [ $e\text{\AA}^{-3}$ ]

**Table S12. Atomic coordinates and  $U_{eq}$  [ $\text{\AA}^2$ ] for 29.**

| Atom   | x          | y           | z           | $U_{eq}$  |
|--------|------------|-------------|-------------|-----------|
| C1_1   | 0.37323(7) | 0.42327(18) | 0.67566(10) | 0.0123(2) |
| C2_1   | 0.35447(7) | 0.26514(19) | 0.76761(11) | 0.0145(2) |
| H2_1   | 0.390867   | 0.142983    | 0.784831    | 0.017     |
| C3_1   | 0.28160(7) | 0.28830(19) | 0.83411(10) | 0.0143(2) |
| H3_1   | 0.268773   | 0.179677    | 0.896469    | 0.017     |
| C4_1   | 0.22656(7) | 0.46733(18) | 0.81174(10) | 0.0120(2) |
| C5_1   | 0.24746(7) | 0.62659(19) | 0.72008(10) | 0.0135(2) |
| H5_1   | 0.211718   | 0.750362    | 0.703608    | 0.016     |
| C6_1   | 0.31967(7) | 0.60515(18) | 0.65340(10) | 0.0129(2) |
| C7_1   | 0.44327(7) | 0.44208(18) | 0.59044(10) | 0.0123(2) |
| C8_1   | 0.56725(7) | 0.36132(19) | 0.48252(10) | 0.0125(2) |
| C9_1   | 0.51099(7) | 0.30090(19) | 0.57375(10) | 0.0136(2) |
| H9_1   | 0.518328   | 0.168547    | 0.622910    | 0.016     |
| C10_1  | 0.14528(7) | 0.48775(19) | 0.88233(10) | 0.0129(2) |
| C11_1  | 0.15002(8) | 0.3645(2)   | 1.01127(11) | 0.0184(3) |
| H11A_1 | 0.099596   | 0.395180    | 1.057781    | 0.028     |
| H11B_1 | 0.198958   | 0.415824    | 1.062280    | 0.028     |
| H11C_1 | 0.154544   | 0.203879    | 0.996096    | 0.028     |
| C12_1  | 0.64618(7) | 0.24406(19) | 0.44759(11) | 0.0153(2) |
| H12A_1 | 0.634131   | 0.093489    | 0.412712    | 0.018     |
| H12B_1 | 0.685600   | 0.230986    | 0.522764    | 0.018     |

|        |            |           |             |           |
|--------|------------|-----------|-------------|-----------|
| C13_1  | 0.07415(7) | 0.3858(2) | 0.79820(12) | 0.0201(3) |
| H13A_1 | 0.021736   | 0.398780  | 0.842224    | 0.030     |
| H13B_1 | 0.086071   | 0.228181  | 0.782513    | 0.030     |
| H13C_1 | 0.069317   | 0.465424  | 0.716238    | 0.030     |
| C14_1  | 0.12359(7) | 0.7330(2) | 0.90859(11) | 0.0168(2) |
| H14A_1 | 0.073207   | 0.739939  | 0.958079    | 0.025     |
| H14B_1 | 0.113853   | 0.811444  | 0.826968    | 0.025     |
| H14C_1 | 0.169885   | 0.803625  | 0.957429    | 0.025     |

$U_{eq}$  is defined as 1/3 of the trace of the orthogonalized  $U_{ij}$  tensor.

**Table S13. Anisotropic displacement parameters [ $\text{\AA}^2$ ] for 29. The anisotropic displacement factor exponent takes the form:  $-2\pi^2 [h^2(a^*)^2U_{11} + k^2(b^*)^2U_{22} + \dots + 2hka^*b^*U_{12}]$**

| Atom  | $U_{11}$  | $U_{22}$  | $U_{33}$  | $U_{23}$   | $U_{13}$  | $U_{12}$   |
|-------|-----------|-----------|-----------|------------|-----------|------------|
| C1_1  | 0.0133(5) | 0.0127(5) | 0.0108(5) | -0.0005(4) | 0.0000(4) | 0.0005(4)  |
| C2_1  | 0.0160(5) | 0.0125(5) | 0.0152(5) | 0.0025(4)  | 0.0017(4) | 0.0034(4)  |
| C3_1  | 0.0172(5) | 0.0129(5) | 0.0130(5) | 0.0019(4)  | 0.0035(4) | 0.0008(4)  |
| C4_1  | 0.0130(5) | 0.0124(5) | 0.0106(5) | -0.0015(4) | 0.0011(4) | -0.0009(4) |
| C5_1  | 0.0143(5) | 0.0126(5) | 0.0137(5) | 0.0006(4)  | 0.0013(4) | 0.0028(4)  |
| C6_1  | 0.0144(5) | 0.0127(5) | 0.0117(5) | 0.0007(4)  | 0.0010(4) | 0.0003(4)  |
| C7_1  | 0.0129(5) | 0.0127(5) | 0.0113(5) | 0.0005(4)  | 0.0006(4) | 0.0000(4)  |
| C8_1  | 0.0127(5) | 0.0122(5) | 0.0125(5) | -0.0002(4) | 0.0013(4) | 0.0003(4)  |
| C9_1  | 0.0152(5) | 0.0121(5) | 0.0136(5) | 0.0023(4)  | 0.0013(4) | 0.0010(4)  |
| C10_1 | 0.0132(5) | 0.0122(5) | 0.0136(5) | -0.0004(4) | 0.0031(4) | 0.0001(4)  |
| C11_1 | 0.0234(6) | 0.0172(6) | 0.0152(5) | 0.0021(4)  | 0.0081(4) | 0.0038(5)  |
| C12_1 | 0.0152(5) | 0.0146(5) | 0.0165(5) | 0.0044(4)  | 0.0041(4) | 0.0037(4)  |
| C13_1 | 0.0157(5) | 0.0248(6) | 0.0199(6) | -0.0069(5) | 0.0026(4) | -0.0029(5) |

|       |           |           |           |            |           |           |
|-------|-----------|-----------|-----------|------------|-----------|-----------|
| C14_1 | 0.0182(5) | 0.0142(5) | 0.0184(5) | -0.0003(4) | 0.0054(4) | 0.0024(4) |
|-------|-----------|-----------|-----------|------------|-----------|-----------|

**Table S14. Bond lengths and angles for 29.**

| Atom–Atom                | Length [Å] |
|--------------------------|------------|
| C1_1–C2_1                | 1.3919(15) |
| C1_1–C6_1                | 1.4030(15) |
| C1_1–C7_1                | 1.4690(15) |
| C2_1–C3_1                | 1.3940(15) |
| C2_1–H2_1                | 0.9500     |
| C3_1–C4_1                | 1.4046(15) |
| C3_1–H3_1                | 0.9500     |
| C4_1–C5_1                | 1.4032(15) |
| C4_1–C10_1               | 1.5322(15) |
| C5_1–C6_1                | 1.3849(15) |
| C5_1–H5_1                | 0.9500     |
| C6_1–C12_1 <sup>#1</sup> | 1.5102(15) |
| C7_1–C9_1                | 1.3960(15) |
| C7_1–C8_1 <sup>#1</sup>  | 1.4103(15) |
| C8_1–C9_1                | 1.3894(15) |
| C8_1–C12_1               | 1.5090(15) |
| C9_1–H9_1                | 0.9500     |
| C10_1–C11_1              | 1.5345(15) |
| C10_1–C13_1              | 1.5380(16) |
| C10_1–C14_1              | 1.5393(16) |
| C11_1–H11A_1             | 0.9800     |

| C11_1–H11B_1       | 0.9800     |
|--------------------|------------|
| C11_1–H11C_1       | 0.9800     |
| C12_1–H12A_1       | 0.9900     |
| C12_1–H12B_1       | 0.9900     |
| C13_1–H13A_1       | 0.9800     |
| C13_1–H13B_1       | 0.9800     |
| C13_1–H13C_1       | 0.9800     |
| C14_1–H14A_1       | 0.9800     |
| C14_1–H14B_1       | 0.9800     |
| C14_1–H14C_1       | 0.9800     |
|                    |            |
| Atom–Atom–<br>Atom | Angle [°]  |
| C2_1–C1_1–<br>C6_1 | 119.65(10) |
| C2_1–C1_1–<br>C7_1 | 131.64(10) |
| C6_1–C1_1–<br>C7_1 | 108.70(9)  |
| C1_1–C2_1–<br>C3_1 | 119.15(10) |



|                     |            |
|---------------------|------------|
| C1_1–C2_1–<br>H2_1  | 120.4      |
| C3_1–C2_1–<br>H2_1  | 120.4      |
| C2_1–C3_1–<br>C4_1  | 122.01(10) |
| C2_1–C3_1–<br>H3_1  | 119.0      |
| C4_1–C3_1–<br>H3_1  | 119.0      |
| C5_1–C4_1–<br>C3_1  | 117.81(10) |
| C5_1–C4_1–<br>C10_1 | 120.51(10) |
| C3_1–C4_1–<br>C10_1 | 121.67(10) |
| C6_1–C5_1–<br>C4_1  | 120.66(10) |
| C6_1–C5_1–<br>H5_1  | 119.7      |
| C4_1–C5_1–<br>H5_1  | 119.7      |
| C5_1–C6_1–<br>C1_1  | 120.70(10) |

|                      |            |
|----------------------|------------|
| C5_1–C6_1–<br>C12_1  | 129.26(10) |
| C1_1–C6_1–<br>C12_1  | 110.04(9)  |
| C9_1–C7_1–<br>C8_1   | 121.07(10) |
| C9_1–C7_1–<br>C1_1   | 130.61(10) |
| C8_1–C7_1–<br>C1_1   | 108.31(9)  |
| C9_1–C8_1–<br>C7_1   | 121.47(10) |
| C9_1–C8_1–<br>C12_1  | 128.52(10) |
| C7_1–C8_1–<br>C12_1  | 109.99(9)  |
| C8_1–C9_1–<br>C7_1   | 117.47(10) |
| C8_1–C9_1–<br>H9_1   | 121.3      |
| C7_1–C9_1–<br>H9_1   | 121.3      |
| C4_1–C10_1–<br>C11_1 | 111.86(9)  |

|                         |            |
|-------------------------|------------|
| C4_1-C10_1-<br>C13_1    | 108.77(9)  |
| C11_1-C10_1-<br>C13_1   | 108.46(10) |
| C4_1-C10_1-<br>C14_1    | 111.50(9)  |
| C11_1-C10_1-<br>C14_1   | 107.90(9)  |
| C13_1-C10_1-<br>C14_1   | 108.26(10) |
| C10_1-C11_1-<br>H11A_1  | 109.5      |
| C10_1-C11_1-<br>H11B_1  | 109.5      |
| H11A_1-C11_1-<br>H11B_1 | 109.5      |
| C10_1-C11_1-<br>H11C_1  | 109.5      |
| H11A_1-C11_1-<br>H11C_1 | 109.5      |
| H11B_1-C11_1-<br>H11C_1 | 109.5      |
| C8_1-C12_1-<br>C6_1     | 102.95(9)  |

|                         |       |
|-------------------------|-------|
| C8_1-C12_1-<br>H12A_1   | 111.2 |
| C6_1-C12_1-<br>H12A_1   | 111.2 |
| C8_1-C12_1-<br>H12B_1   | 111.2 |
| C6_1-C12_1-<br>H12B_1   | 111.2 |
| H12A_1-C12_1-<br>H12B_1 | 109.1 |
| C10_1-C13_1-<br>H13A_1  | 109.5 |
| C10_1-C13_1-<br>H13B_1  | 109.5 |
| H13A_1-C13_1-<br>H13B_1 | 109.5 |
| C10_1-C13_1-<br>H13C_1  | 109.5 |
| H13A_1-C13_1-<br>H13C_1 | 109.5 |
| H13B_1-C13_1-<br>H13C_1 | 109.5 |
| C10_1-C14_1-<br>H14A_1  | 109.5 |

|                         |       |
|-------------------------|-------|
| C10_1–C14_1–<br>H14B_1  | 109.5 |
| H14A_1–C14_1–<br>H14B_1 | 109.5 |
| C10_1–C14_1–<br>H14C_1  | 109.5 |

|                         |       |
|-------------------------|-------|
| H14A_1–C14_1–<br>H14C_1 | 109.5 |
| H14B_1–C14_1–<br>H14C_1 | 109.5 |

Symmetry transformations used to generate equivalent atoms:

#1: 1-X, 1-Y, 1-Z;

**Table S15. Torsion angles for 29.**

| Atom–Atom–<br>Atom–Atom  | Torsion<br>Angle [°] |
|--------------------------|----------------------|
| C6_1–C1_1–C2_1–<br>C3_1  | 1.35(16)             |
| C7_1–C1_1–C2_1–<br>C3_1  | -179.04(11)          |
| C1_1–C2_1–C3_1–<br>C4_1  | -0.36(17)            |
| C2_1–C3_1–C4_1–<br>C5_1  | -0.65(16)            |
| C2_1–C3_1–C4_1–<br>C10_1 | 178.11(10)           |
| C3_1–C4_1–C5_1–<br>C6_1  | 0.68(16)             |
| C10_1–C4_1–<br>C5_1–C6_1 | -178.10(10)          |

|                            |             |
|----------------------------|-------------|
| C4_1–C5_1–C6_1–<br>C1_1    | 0.29(16)    |
| C4_1–C5_1–C6_1–<br>C12_1#1 | -179.68(11) |
| C2_1–C1_1–C6_1–<br>C5_1    | -1.33(16)   |
| C7_1–C1_1–C6_1–<br>C5_1    | 178.98(10)  |
| C2_1–C1_1–C6_1–<br>C12_1#1 | 178.65(10)  |
| C7_1–C1_1–C6_1–<br>C12_1#1 | -1.04(12)   |
| C2_1–C1_1–C7_1–<br>C9_1    | 2.4(2)      |
| C6_1–C1_1–C7_1–<br>C9_1    | -177.98(11) |

|                                        |             |
|----------------------------------------|-------------|
| C2_1–C1_1–C7_1–<br>C8_1 <sup>#1</sup>  | -178.71(11) |
| C6_1–C1_1–C7_1–<br>C8_1 <sup>#1</sup>  | 0.93(12)    |
| C7_1 <sup>#1</sup> –C8_1–<br>C9_1–C7_1 | 0.17(18)    |
| C12_1–C8_1–<br>C9_1–C7_1               | 178.26(11)  |
| C8_1 <sup>#1</sup> –C7_1–<br>C9_1–C8_1 | -0.17(18)   |
| C1_1–C7_1–C9_1–<br>C8_1                | 178.63(11)  |
| C5_1–C4_1–<br>C10_1–C11_1              | -156.41(10) |
| C3_1–C4_1–<br>C10_1–C11_1              | 24.86(14)   |
| C5_1–C4_1–<br>C10_1–C13_1              | 83.82(13)   |
| C3_1–C4_1–<br>C10_1–C13_1              | -94.91(12)  |
| C5_1–C4_1–<br>C10_1–C14_1              | -35.48(14)  |
| C3_1–C4_1–<br>C10_1–C14_1              | 145.78(11)  |

|                                                       |             |
|-------------------------------------------------------|-------------|
| C9_1–C8_1–<br>C12_1–C6_1 <sup>#1</sup>                | -178.11(11) |
| C7_1 <sup>#1</sup> –C8_1–<br>C12_1–C6_1 <sup>#1</sup> | 0.15(12)    |

Symmetry transformations used to generate equivalent atoms:

#1: 1-X, 1-Y, 1-Z;

## References

- [1] Brøløs, L.; Kilde, M. D.; Brock-Nannestad, T.; Nielsen, M. B. *Eur. J. Org. Chem.* **2021**, *25*, 3537-3544.
- [2] Bruker, *SAINT, V8.40A*, Bruker AXS Inc., Madison, Wisconsin, USA.
- [3] Krause, L.; Herbst-Irmer, R.; Sheldrick, G. M.; Stalke, D. *J. Appl. Cryst.* **2015**, *48*, 3–10, doi:10.1107/S1600576714022985.
- [4] Sheldrick, G. M. *Acta Cryst.* **2015**, *A71*, 3–8, doi:10.1107/S2053273314026370.
- [5] Sheldrick, G. M. *Acta Cryst.* **2015**, *C71*, 3–8, doi:10.1107/S2053229614024218.
- [6] Groom, C. R.; Bruno, I. J.; Lightfoot, M. P.; Ward, S. C. *Acta Cryst.* **2016**, *B72*, 171–179, doi:10.1107/S2052520616003954.
- [7] Kratzert, D. *FinalCif, V125*, <https://dkratzert.de/finalcif.html>
